1 **Main Manuscript for**

2 Artificial light at night shifts the circadian system but still leads to physiological  
3 disruption in a wild bird

4

5 Davide M. Dominoni<sup>1,2,\*</sup>, Maaïke de Jong<sup>2,3</sup>, Kees van Oers<sup>2</sup>, Peter O'Shaughnessy<sup>1</sup>, Gavin Blackburn<sup>4</sup>,  
6 Els Atema<sup>2</sup>, Christa A. Mateman<sup>2</sup>, Pietro B. D'Amelio<sup>5,6,7</sup>, Lisa Trost<sup>5</sup>, Michelle Bellingham<sup>1</sup>, Jessica  
7 Clark<sup>1</sup>, Marcel E. Visser<sup>2,8</sup>, Barbara Helm<sup>1,8</sup>

8

9 <sup>1</sup> Institute of Biodiversity, Animal Health and Comparative Medicine, University of Glasgow,  
10 University Avenue, Glasgow, G12 8QQ UK

11 <sup>2</sup> Department of Animal Ecology, Netherlands Institute of Ecology (NIOO-KNAW), Wageningen, The  
12 Netherlands

13 <sup>3</sup> Plant Ecology and Nature Conservation Group, Wageningen University & Research, Wageningen,  
14 The Netherlands

15 <sup>4</sup> Glasgow Polyomics, Wolfson Wohl Cancer Research Centre, College of Medical, Veterinary and Life  
16 Sciences, University of Glasgow, Glasgow G61 1BD, UK

17 <sup>5</sup> Department of Behavioural Neurobiology, Max Planck Institute for Ornithology, Seewiesen,  
18 Germany

19 <sup>6</sup> FitzPatrick Institute of African Ornithology, University of Cape Town, Rondebosch 7701, South Africa

20 <sup>7</sup> Centre d'Ecologie Fonctionnelle et Evolutive, University of Montpellier, CNRS, EPHE, IRD, Univ Paul-  
21 Valéry Montpellier 3, Montpellier, France

22 <sup>8</sup> Groningen Institute of Evolutionary Life Sciences (GELIFES), University of Groningen, Nijenborgh 7,  
23 9747 AG Groningen, The Netherlands

24

25 \* Davide M. Dominoni

26 **Email:** [davide.dominoni@glasgow.ac.uk](mailto:davide.dominoni@glasgow.ac.uk)

27

28 **Author Contributions:** DMD, MdJ, MEV and BH designed the study. DMD, MdJ, PBD, LT and BH

29 collected the data and samples. DMD, KvO, POS, EA, CAM, MB, JC performed the gene expression

30 assays. GB performed the metabolomics analyses. DMD conducted the statistical analyses. DMD and

31 BH wrote the paper.

32

33 **Competing Interest Statement:** We declare no competing interests.

34 **Classification:** MAJOR: Biological sciences. MINOR: Applied Biological Sciences

35 **Keywords:** light pollution; *Parus major*; circadian disruption; metabolomics; BMAL1.

36 **This PDF file includes:**

37 Main Text

38 Figures 1 to 7

39

40

41

42

43

44

45

46

47

48

49

50

51

## 52 **Abstract**

53 Globally increasing levels of artificial light at night (ALAN) have been associated with shifts in  
54 behavioral rhythms of many wild organisms. It is however unknown to what extent this change in  
55 behavior is due to shifts in the circadian clock, and, importantly, whether the physiological pathways  
56 orchestrated by the circadian clock are desynchronized by ALAN. Such circadian disruption could  
57 have severe consequences for wildlife health, as shown for humans. Here, we analyze the effects of  
58 experimental ALAN on rhythmic behavior, gene expression and metabolomic profiles in a wild  
59 songbird, the great tit (*Parus major*). We exposed 34 captive males to three ALAN intensities or to  
60 dark nights and recorded their activity rhythms. After three weeks, we collected mid-day and  
61 midnight samples of hypothalamus, hippocampus, liver, spleen and plasma. ALAN advanced wake-up  
62 time, and this shift was paralleled by an advance in hypothalamic expression of the clock gene  
63 *BMAL1*, which is key to integrating physiological pathways. *BMAL1* advances were remarkably  
64 consistent across tissues, suggesting close links of brain and peripheral clock gene expression with  
65 activity rhythms. However, only a minority of other candidate genes (4 out of 12) paralleled the  
66 shifted *BMAL1* expression. Moreover, metabolomic profiling showed that only 9.7% of the 755  
67 analyzed metabolites followed the circadian shift. Thus, despite the shifted timing of key clock  
68 functions under ALAN, birds suffered internal desynchronization. We thus suggest circadian  
69 disruption to be a key link between ALAN and health impacts, in birds and humans alike.

70

## 71 **Significance Statement**

72 Shifts in daily activity are a common consequence of artificial light at night (ALAN). In humans, shifted  
73 activity cycles often become desynchronized from internal physiological rhythms, with serious health  
74 implications. To what extent a similar desynchronization occurs in wild animals experiencing ALAN is  
75 currently unknown. We exposed captive great tits to increasing levels of LAN, and found that activity  
76 patterns and a core clock gene, *BMAL1*, shifted in concert. However, only a minority of additional  
77 candidate genes and less than 10% of the metabolites followed this circadian shift, suggesting

78 internal desynchronization of physiological rhythms. Our study emphasizes the massive potential for  
79 ALAN to impact the health of wild animals through circadian disruption.

80

## 81 **Main Text**

### 82 **Introduction**

83 On our rhythmic planet, organisms have adapted to the change of day and night by evolving  
84 circadian rhythms that are highly sensitive to light (1). The near-ubiquity of circadian rhythms across  
85 kingdoms of life suggests major fitness benefits on two grounds. Internally, the circadian system  
86 regulates temporal coordination within the body to reduce conflict and overlap between different  
87 processes. Externally, the circadian system anticipates environmental fluctuations, enabling  
88 organisms to align their behavior and physiology with nature's cycles (1, 2), such as the daily  
89 alternation of light and darkness. However, globally most humans and wild organisms in their vicinity  
90 are now exposed to artificial light at night (ALAN), and thus to a rapidly altered light environment (3,  
91 4) that threatens the refined functioning of the circadian system.

92 In animals, rhythmicity is primarily generated on a molecular level by a transcription-  
93 translation feed-back loop (TTFL). This rhythmicity is modulated by multiple interacting systems,  
94 including neuronal, endocrine, metabolic and immune pathways (5, 6)(7). The orchestration of these  
95 processes involves complex interactions between sensory input, central and peripheral clocks, and  
96 effector systems (2). There is increasing evidence that ALAN disrupts these processes, with possible  
97 consequences ranging from compromised human health to loss of ecosystem functions (8–10). In  
98 free-living and captive organisms, altered daily and annual activity has been widely reported, and  
99 experimental illumination has confirmed causal effects of ALAN (11, 12). Still, it is largely unclear  
100 whether the circadian system, its multiple components, and the physiological pathways it  
101 coordinates, remain synchronized with activity patterns (13–18). ALAN has also been shown to  
102 induce physiological changes, including in endocrine, immune and metabolic pathways (15, 19, 20).  
103 These changes could be due to circadian disruption, with possible negative consequences for fitness

104 (9, 21). Addressing these issues requires multi-level analyses that simultaneously examine effects of  
105 ALAN on rhythmic behavior and different physiological pathways (9), but these are currently lacking.  
106 Here we aim to fill this gap by an integrated study of a bird, the great tit (*Parus major*),  
107 whose behavioral response to ALAN is well-characterized (11, 22–26). We measured day-night  
108 differences in gene transcripts in multiple tissues and in blood metabolites under a realistic range  
109 (27, 28) of experimental ALAN and in dark controls, and investigated links to behavioral rhythms. The  
110 selected genes represented the circadian TTFL (Brain and Muscle ARNT-Like 1, *BMAL1*, alias *ARNTL*;  
111 cryptochrome 1, *CRY1*), a clock modulator (*casein kinase 1ε*, *CK1ε*) (29), and endocrine, immune and  
112 metabolic pathways putatively affected by circadian disruption (Table S1). Tissues included central  
113 pacemaker and memory sites (hypothalamus, where important avian circadian pacemaker  
114 components are located (29), and hippocampus; Fig. S1), and metabolic (liver) and immune tissues  
115 (spleen). Testes of the same birds were analyzed in a separate study (30). In contrast to the  
116 candidate gene approach, our untargeted metabolomics approach captured both expected and novel  
117 effects of ALAN (31). We aimed to identify whether i) hypothalamic clock gene expression was  
118 affected by ALAN, ii) potential temporal shifts in clock gene expression were consistent across  
119 tissues, iii) behavioral and clock gene rhythms were aligned, and iv) transcript and metabolite  
120 temporal shifts were consistent across physiological pathways. Any inconsistencies in temporal shifts  
121 indicate the potential for internal desynchronization, and hence, circadian disruption (9, 21).

122 Great tits are a rewarding study system because their urbanized distribution allows to study  
123 ALAN responses also in free-living individuals, because detailed molecular and circadian information  
124 is available (32–34), and because like humans, they are diurnal (9, 11, 22). We studied 34 male great  
125 tits under simulated winter daylength (LD 8.25:15.75 h) in four treatment groups, ranging from dark  
126 night controls to 5 lx (Table S2, S3), and sampled metabolites and transcripts at mid-day (3 h 30 min  
127 after lights on; i.e. 3.5 h Zeitgeber time) and midnight (7 h 15 min after lights off; i.e. 15.5 h Zeitgeber  
128 time). We chose a study design that enabled detection of rhythmicity and ALAN effects from  
129 sampling two time-points 12 h apart (35, 36). The design was enhanced firstly by tracking possible

130 shifts in circadian rhythms by a focal clock gene, *BMAL1*, whose transcription under dark nights in  
131 songbirds peaks in the late evening (29). Secondly, we applied ALAN levels that advance activity of  
132 captive great tits by 6 h (22) and thus, if molecular rhythms track behavior, day-night differences at  
133 all phase positions are captured.

134 Our specific predictions are illustrated in Figure 1, which shows expected patterns for  
135 *BMAL1*. Under dark nights (Fig. 1A, green curve), during midnight sampling (blue dots) *BMAL1*  
136 transcripts will have just passed the peak (maximum), and during mid-day (yellow dots) they will  
137 have just passed the trough (minimum). Under our hypothesis, the TTFL matches behavior, and thus,  
138 with increasing ALAN (red curves), the *BMAL1* rhythm will also advance. Hence, at midnight *BMAL1*  
139 levels will be measured progressively later than the peak, and drop, whereas mid-day levels will be  
140 measured closer to the next peak, and hence rise. When combining midnight and mid-day data (Fig.  
141 1B), we thus expected a cross-over of detected *BMAL1* levels. Other rhythmic compounds should  
142 show similar patterns, although the point of intersection and precise change of level depends on  
143 their phase. In contrast, if the TTFL does not match the behavioral shift by ALAN, compound levels  
144 will show as two horizontal lines across ALAN, representing day and night, respectively. Levels of  
145 non-rhythmic compounds will fall on a horizontal line, representing both day and night.

146

## 147 **Results**

### 148 ***ALAN advances circadian timing of activity and *BMAL1* expression***

149 Daily cycles of activity were strongly affected by the ALAN treatment (GAMM,  $p=0.001$ , Fig. 2A and  
150 Fig. S2; Table S4). In the 5 lx group birds were generally active 6-7 h before lights-on, whereas birds in  
151 the other two light treatments (0.5 and 1.5 lx) advanced morning activity to a much lesser extent.  
152 This advancement in the onset of morning activity led to 40% of the overall diel activity in the 5 lx  
153 group to occur during the night, compared to 11 and 14% in the 0.5 and 1.5 lx groups, and less than  
154 1% in the control dark group. Thus, with increasing ALAN, nocturnal activity also increased (LMM,  
155 treatment  $p < 0.001$ , Fig. 2A and Table S5).

156 Breaking down this average diel profile (Fig. 2A) by time since first exposure to ALAN (i.e.,  
157 days from start of the experiment to first sampling, days 0 to 18) yields insights into how differences  
158 in activity developed, and into circadian mechanisms involved (Fig. 2B-C). Upon exposure to ALAN,  
159 the birds' activity onset (Fig. 2C) advanced in all treatment groups. In the groups with intermediate  
160 light exposure (0.5 lx, 1.5 lx) the phase-advance occurred instantaneously and to a similar extent (155  
161 and 142 min for the 0.5 and 1.5 lx groups respectively,  $P > 0.1$  for this pairwise comparison), but  
162 thereafter timing remained stable. The group exposed to 5 lx showed an even larger instantaneous  
163 phase advance of an average of almost five hours (mean  $\pm$  SEM =  $289 \pm 21$  min), but thereafter  
164 continued to gradually phase-advance until reaching a stable phase after 10 days (interaction  
165 treatment\*day,  $p < 0.001$ , Fig. 2C, Table S2). The advance until stabilization could equally represent  
166 gradual entrainment to an early phase, or temporary free-run of activity, as suggested by  
167 periodogram analysis. Indeed, we found that in the 5 lx group, prior to stabilization, period length  
168 deviated from that of all other groups and from 24 h, reaching levels similar to those of free-running  
169 conspecifics in an earlier study (37) (mean period length 5 lx group: 23.6 h; LM; Table S6). The  
170 individual actograms (Fig. S3) further suggest that the activity rhythm in the 5 lx group may have split  
171 into an advancing morning component and a more stably entrained evening component, suggesting  
172 internal desynchronization.

173 Changes in the activity offset were much less pronounced (Fig. 2B). The 5 lx group showed an  
174 instantaneous phase-shift, which in contrast to morning activity delayed, rather than advanced,  
175 activity compared to the lights-off time. This initial delay was followed by a gradual advance of  
176 evening offset, similar to but smaller than that of morning onset. At the end of the experiment birds  
177 in the 5 lx group ceased their activity before lights-off, and earlier than other groups (treatment\*day,  
178  $p < 0.001$ , Fig. 2B, Table S5). This advance did not compensate for the earlier onset, as birds in the 5 lx  
179 group were more active over the whole 24h than the remaining birds (treatment\*day,  $p = 0.01$ , Table  
180 S5).

181

182 ***Hypothalamic BMAL1 expression at night parallels advanced activity onset***

183 We next sought to identify whether the profound shifts in activity patterns were paralleled by  
184 corresponding shifts in the pacemaker, measured by expression of *BMAL1* in the hypothalamus. Day-  
185 night differences in transcripts of *BMAL1* inverted with increasing ALAN (Fig. S4A), as predicted  
186 above (Fig. 1). While *BMAL1* expression was higher at midnight than at mid-day for the control birds,  
187 increasing ALAN induced a reversal of this pattern, so that birds in the 5 lx group had much higher  
188 expression at mid-day than at midnight (treatment\*time,  $p < 0.01$ , Table S7).

189 To assess whether changes in day-night *BMAL1* gene expression correlated with temporal  
190 behavioral shifts, we related *BMAL1* levels to onset of activity of an individual once it had stably  
191 shifted in response to the ALAN treatment (Fig. 2B, 2C, after 10 days). Onset was closely predicted by  
192 hypothalamic *BMAL1* expression at midnight (Gaussian LM,  $p < 0.001$ ,  $R^2 = 0.71$ , Fig. 3A). Across ALAN  
193 levels, the earliest rising birds had the lowest midnight expression of *BMAL1*. However, the steep  
194 linear regression was largely based on differences between ALAN groups in both activity timing (Figs.  
195 2, 3) and *BMAL1* expression (Fig. S4A). Indeed, this relationship was even stronger when we only  
196 considered the 0.5, 1.5 and 5 lx group in the analysis (Gaussian LM  $p < 0.001$ ,  $R^2 = 0.85$ ), but the  
197 association was not present for the dark control birds (Gaussian LM,  $P = 0.87$ ). Individual midnight  
198 *BMAL1* levels were also predictive of mean offset of activity, albeit less strongly so than for onset  
199 (Gaussian LM,  $p = 0.006$ ,  $R^2 = 0.28$ , Fig. 3B). Conversely, mid-day *BMAL1* levels did not significantly  
200 predict variation in any of the activity traits (Gaussian LMs,  $p > 0.1$  and  $R^2 < 0.16$  for all measures, Fig.  
201 3C-D).

202

203 ***ALAN reverses day-night BMAL1 expression patterns in multiple tissues***

204 ALAN-induced shifts in *BMAL1*, as detected in the hypothalamus, were remarkably consistent across  
205 tissues. Hippocampal *BMAL1* expression profiles resembled those in the hypothalamus (Fig. S5A) and  
206 were strongly affected by the interaction of treatment and sampling time ( $p < 0.001$ , Table S8). Within  
207 individuals, mid-day and midnight transcripts in both brain tissues were closely related (LM,  $p < 0.001$ ,



208 Fig. 4A, Table S9). Also liver *BMAL1* showed similar effects of ALAN on day-night expression profiles  
209 (Fig. S6A; time\*treatment,  $p < 0.001$ , Table S10), so that within individuals, hepatic and hypothalamic  
210 transcripts also correlated closely (LM,  $p < 0.001$ , Fig. 4B, Table S9). These findings were consolidated  
211 by parallel ALAN effects on *BMAL1* expression in the spleen (Fig. S7A; time\*treatment,  $p = 0.003$ ,  
212 Table S11), and close individual-level correlation of spleen transcripts with those in hypothalamus  
213 (LM,  $p = 0.011$ , Fig. 4C) and liver (LM,  $p = 0.001$ , Fig. 4D, Table S9).

214

### 215 ***Partial disruption of expression patterns by ALAN in other genes***

216 We next sought to assess whether the same reversal of day-night expression patterns found  
217 for *BMAL1* was paralleled in other genes analyzed in the different tissues. We found mixed evidence  
218 for this, as in most of the pathways we examined some genes shifted in concert with *BMAL1*, while  
219 others did not. This suggests that different pathways were differentially affected by ALAN.

220 Among clock-related genes, hypothalamic expression levels of *CK1ε*, a clock modulator, was  
221 not affected by the light treatment ( $p = 0.71$ ). Expression was consistently, although not significantly,  
222 higher at mid-day ( $p = 0.09$ , Fig. 5H, Table S7). Similarly, the same gene was not significantly affected by  
223 sampling time or treatment in the liver. Expression of hepatic *CK1ε* increased with light intensity, albeit  
224 not significantly so ( $p = 0.078$ , Fig. 5P, Table S10), and was not affected by sampling time ( $p = 0.13$ , Table  
225 S10). In the liver another circadian gene, *CRY1*, showed no expression trend that aligned with that of  
226 *BMAL1* (Fig. 5O). Moreover, *CRY1* was not affected by treatment or sampling time ( $P > 0.6$  for both  
227 variables, Fig. 5O, Table S10).

228 Among metabolic genes, patterns similar to those in *BMAL1* were evident in *SIRT1*, a gene  
229 which is also involved in the modulation of the circadian cycle (38)(39) (Table S1). Hypothalamic  
230 *SIRT1* showed a clear change of day-night expression with increasing ALAN (Fig. 5E; treatment\*time,  
231  $p = 0.029$ , Table S7), and *SIRT1* mRNA levels were closely related to those of hypothalamic *BMAL1*  
232 (LM,  $p < 0.001$ , Table S9). In the liver, the metabolic gene *NRF1* showed a similar response to ALAN as  
233 *BMAL1*, with reversed day-night expression in the 5 lx group compared to other groups

234 (treatment\*time,  $p < 0.001$ , Fig. 5F, Table S10), and close correlation with *BMAL1* (LM,  $p < 0.001$ ). In  
235 contrast, another hepatic metabolic gene, *IGF1*, was not significantly affected by light treatment or  
236 sampling time (for both,  $p > 0.11$ , Fig. 5Q, Table S10). In the hippocampus (Table S8), mid-day and  
237 midnight levels of the mineralocorticoid receptor, *MR*, decreased significantly with increasing ALAN  
238 ( $p = 0.044$ , Fig. 5M). Levels were higher at night than during the day, albeit not significantly so ( $p = 0.1$ ).  
239 Last, the levels of the glucocorticoid receptor, *GR*, showed no significant relationship with either light  
240 treatment or sampling time ( $p > 0.33$  in both cases, Fig. 5N).

241 Among immune genes, ALAN affected the hypothalamic mRNA levels of *LY86*, which showed  
242 reduced levels with increasing ALAN ( $p = 0.04$ , Fig. 5K, Table S7). Expression of this gene tended to be  
243 lower at midnight than mid-day, albeit not significantly so ( $p = 0.08$ ). However, the same gene  
244 analyzed in the spleen was not affected by either treatment or sampling time ( $p > 0.7$ , Fig. 5L, Table  
245 S11). Conversely, another immune gene in the spleen, *TLR4*, showed the same pattern as *BMAL1* (Fig.  
246 5G, time\*treatment,  $p = 0.006$ , Table S11).

247 Last, we also analyzed genes involved in photoperiod seasonal response in the avian brain.  
248 *FOXP2*, a gene that in birds is involved in learning, song development and photoperiod-dependent  
249 seasonal brain growth, showed no significant trends related to ALAN or sampling time ( $p > 0.32$  in both  
250 cases, Fig. 5J). *DIO2*, a thyroid-axis gene involved in photoperiodic reproductive activation, was also  
251 not affected by either ALAN or sampling time ( $p > 0.45$  for both variables, Fig. 5I).

252

### 253 ***Metabolomic profiles support only a limited reversal of day-night physiology under ALAN***

254 To explore the different impacts of ALAN on whole-body physiology, we carried out  
255 untargeted LC-MS metabolomic analysis and obtained abundance values for 5483 compounds. Out of  
256 these, 682 were annotated as known metabolites based on accurate mass and predicted retention  
257 time (40) and 73 were identified based on accurate mass measurement and matching retention time  
258 to a known standard (within 5%), for a total of 755 metabolites. We ran individual linear mixed  
259 models for all these 755 metabolites (correcting for false discovery rate at 5%), and found that 44.1%

260 (333) differed significantly by sampling time, with higher levels at mid-day in 197, and higher levels at  
261 midnight in 136 (to see all metabolite tables: <https://doi.org/10.6084/m9.figshare.12927539.v1>). For  
262 29 metabolites we found significant effects of treatment (Table S12). The direction of the treatment  
263 effect depended on the metabolite considered. In 11 metabolites, levels decreased with ALAN, while  
264 in the remaining 18 metabolites an increase was observed when compared to the dark night control  
265 group. Finally, 73 (9.7%) of the 755 metabolites showed significant interaction between treatment  
266 and sampling time (Fig. 6 and Table S13; 34 of those also differed by sampling time). As this pattern  
267 supported reversal of day-night physiology similar to that shown for activity and *BMAL1* expression,  
268 these metabolites were selected for subsequent focal analyses (hereafter named “interactive  
269 dataset”).

270 We dissected variation in the interactive dataset by using two principal component analyses  
271 (PCA) on the samples collected at mid-day and midnight (Fig. 6C, D). For mid-day samples, ALAN  
272 treatments overlapped considerably (Fig. 6C), although low values of PC1 (26 % of variance  
273 explained) aligned with some of the birds in the 1.5 lx and 5 lx treatments. PC1 in the mid-day  
274 dataset was heavily loaded with metabolites of Arginine biosynthesis pathway, including L-Arginine,  
275 Homoarginine and L-Glutamate, as well as other important amino acids such as L-Threonine, L-Lysine  
276 and L-Tyrosine. Conversely, the midnight samples (Fig. 6D) separated clearly between the 5 lx  
277 treatment and the remaining groups. In this midnight PCA, PC1 explained 27% of the variance and  
278 was heavily loaded with metabolites of the Glutamate and Arginine pathways, as well as with N-  
279 acetyl-L-aspartate. PC2, which explained 21% of variation, was heavily loaded with fatty acids,  
280 including Linoleate (to see all factor loading tables:  
281 <https://doi.org/10.6084/m9.figshare.12927536.v1>). The contribution of the Arginine pathway was  
282 further confirmed by pathway analysis, conducted with Metaboanalyst (41), which indicated  
283 “Arginine biosynthesis” as a highly significant pathway in this interactive dataset ( $p < 0.001$ ).  
284 “Aminoacyl-tRNA metabolism” ( $p < 0.001$ ), “Histidine metabolism” ( $p = 0.005$ ), and “Alanine, Aspartate  
285 and glutamate metabolism” ( $p = 0.026$ ) were also indicated as significant pathways.

286 We finally investigated whether, just like midnight levels of *BMAL1* expression (Fig. 4),  
287 midnight principal components of metabolites correlated with individual activity timing. PC1 strongly  
288 predicted the onset of activity via a linear and quadratic relationship ( $n = 19$ ,  $p_{\text{linear}} = 0.007$ ,  
289  $p_{\text{quadratic}}=0.014$ ,  $R^2 = 0.92$ , Fig. 6E), but did not explain offset of activity ( $p=0.63$ ,  $R^2 = 0.04$ , Fig. 6F). PC2  
290 was related to neither timing trait ( $p > 0.2$ ).

291

## 292 Discussion

293 Birds advanced the circadian timing of their activity as expected with increasing levels of ALAN, and  
294 in parallel the gene expression of our focal clock gene, *BMAL1*, was also advanced in the  
295 hypothalamus. Advances in *BMAL1* were consistent across tissues, indicating a shift of the circadian  
296 system in tissues implicated in timing, memory, metabolism and immune function. Furthermore,  
297 advances in nocturnal *BMAL1* potentially correlated with activity onset at the individual level,  
298 consolidating close links between core clock gene expression and behavior. Responses of *BMAL1*  
299 expression were paralleled by a minority of other genes. Similarly, only 9.7% of the metabolome  
300 followed the same shift observed in *BMAL1*, indicating that most physiological pathways were  
301 desynchronized from the circadian system. The emerging picture is that birds shifted their internal  
302 clock time under ALAN, but suffered a high degree of internal desynchronization.

303 On a behavioral level, our findings closely match those of earlier demonstrations of advanced  
304 daily activity under ALAN in captivity for several avian species, including the great tit (15, 22, 24, 42).  
305 In the wild, birds also advanced daily activity under ALAN, although to a lesser extent (e.g. (14, 26,  
306 43)), and often in onset but not offset (25, 26, 28, 44, 45). Previously, behavioral shifts were  
307 interpreted as not involving the circadian clock (24). In an experiment also on the great tit, Spoelstra  
308 and colleagues (24) exposed birds to dark nights and then to ALAN as in our study. Subsequently,  
309 birds were released to constant low-levels of dim light (0.5 lx), where they free-ran. The study found  
310 that the birds free-ran from the timing they had shown under initial dark nights, rather than from  
311 their advanced timing under ALAN. Thus, the authors concluded that the behavioral response to

312 ALAN was due to masking, while the internal clock remained unchanged (24). Our molecular data  
313 suggest a different conclusion, namely that within three weeks of ALAN exposure, internal time had  
314 phase-advanced in concert with behavior. These discrepancies are difficult to interpret because  
315 inferences of the studies are based on different criteria (molecular vs. behavioral) and different  
316 experimental phases (during ALAN vs. during ensuing free-run), but it is clear that additional  
317 experimental data are needed.

318 Our transcriptional findings of ALAN-altered rhythmicity gain support from a comparison of  
319 clock gene expression in Tree sparrows (*Passer montanus*) from an illuminated urban and dark non-  
320 urban habitat (46). Sampled within a day after being brought into captivity, urban birds showed clear  
321 advances in the circadian system, including, as in our birds, in hypothalamic *BMAL1*. Other  
322 experimental studies have also confirmed effects of ALAN on avian rhythms in brain and other tissues  
323 (16, 17). In our study, only some of the investigated regulatory genes aligned with the ALAN-  
324 dependent advances of rhythms in behavior and *BMAL1*. The genes from metabolic pathways that  
325 have close molecular links to the TTFL, *SIRT1* and *NRF1*, mirrored ALAN-dependent changes in  
326 *BMAL1*. However, regulatory genes of immune pathways responded inconsistently, whereby *TLR4*  
327 aligned with *BMAL1* whereas *LY86* did not. The learning gene, *FOXP2* and the thyroid-activating gene  
328 *DIO2* did not mirror the changes in *BMAL1*, nor did the endocrine genes (*MR*, *GR*, *IGF1*). Conversely,  
329 in a complementary study on these same birds, we observed that ALAN exposure, which also  
330 activated the reproductive system, shifted the day-night expression patterns of corticoid receptors  
331 (30).

332 Other experimental studies have confirmed that effects of ALAN on avian rhythms in brain  
333 and other tissues differed between genes and pathways. For example, a study on Zebra finches  
334 (*Taeniopygia guttata*) reported ALAN-induced changes in rhythmic expression of hypothalamic *CRY1*  
335 but not *BMAL1* (16). This differs from our findings, where advances in *BMAL1* were not paralleled by  
336 *CRY1* (17), and from findings that *BMAL1* and *CRY1*, but not another TTFL gene, *CLOCK*, advanced in  
337 an urban bird (47). Divergent responses between clock genes might participate in circadian

338 disruption, and could underlie discrepant behavioral responses, such as differences between activity  
339 onset and offset observed in our study, and in wild great tits (25, 26, 44) and other avian species (28,  
340 45). In our study in the 5 lx group, we also observed splitting of rhythms, which has previously been  
341 linked to reproductive activation (48), a known side-effect of ALAN (13).

342 Our metabolomic data corroborated our main findings on gene expression. Of the 755  
343 identified metabolites, nearly 50% (333) differed between mid-day and mid-night levels. However,  
344 less than 10 % showed changes in rhythm under ALAN (Fig. 7). These findings confirm that some, but  
345 not all featured pathways aligned with shifts in behavior and *BMAL1*. Our findings from captive wild  
346 birds under ALAN match those from human studies. To identify the mechanisms by which circadian  
347 disruption drives metabolic disorders and other pathologies, these studies severely disrupted the  
348 circadian system by sleep deprivation and shift-work protocols (31, 49, 50). The reported changes in  
349 gene expression and metabolite levels were similar to those of our birds under ALAN, including highly  
350 responsive pathways and compounds, in particular Arginine (50), an amino acid strongly linked to  
351 circadian rhythms and innate immune responses (51). Glutamate production from arginine is well  
352 known (52), and changes in these two metabolites may be due to changes in energy requirements at  
353 the different light intensities. N-acetyl-aspartate, a metabolite involved in energy production from  
354 glutamate (53), was also observed to follow changes in behavior and *BMAL1*. Both glutamate and  
355 arginine have a variety of biochemical roles (54, 55), so further work would be required to determine  
356 which of these functions, if any, are associated to the behavioral and gene expression changes we  
357 observed. While preliminary, this data shows the potential of metabolomic techniques for furthering  
358 this area of research.

359 Despite our sampling design of only two time-points and low sample sizes, we derived  
360 descriptors of internal time (*BMAL1* expression; metabolomics PC1 of interactive dataset) whose  
361 midnight levels had high predictive power of activity timing. Thereby, we have shown that internal  
362 time can be captured in birds by a single sample of blood or tissue, a frontline ambition of biomedical  
363 research (35, 36). Our predictive power was limited to treatment groups and within-ALAN

364 individuals, whereas birds kept under dark nights were highly synchronized to the sudden switch of  
365 lights-on.

366 For wild animals, our study adds to emerging evidence of detrimental effects of ALAN on  
367 physiological pathways (9, 10, 21). For example, under ALAN molecular markers for sleep deprivation  
368 were elevated, hypothalamic expression of genes such as *TLR4* was altered (16), neuronal features in  
369 the brain were changed, and cognitive processes and mental health-like states were impaired (16,  
370 20, 56, 57). Altered hepatic expression of several metabolic genes further suggested negative effects  
371 on gluconeogenesis and cholesterol biosynthesis (15). Consequences of ALAN-induced changes in  
372 immune function include increased host competence for infectious disease (58), indicating how  
373 effects on individuals may cascade to ecological or epidemiological scales.

374 Addressing effects of ALAN is therefore urgent (10, 59). Our data contribute to the rising  
375 evidence for dose-dependent responses of behavior and physiology (22, 30, 60), which might allow  
376 mitigating against ALAN impacts on wildlife by reducing light intensity (61). Importantly, we detected  
377 substantial effects even at light intensities (0.5 lx) that are typically far exceeded by street  
378 illumination, and to which animals are exposed to in the wild (27, 28). These findings transfer to  
379 other organisms including plants, insects, and mammals including humans (12, 62–65) and call for  
380 limits to the ever faster global increase in light pollution (3).

381

382

## 383 **Materials and Methods**

### 384 *Data availability*

385 The full details of our methods are presented in the *Supporting Information* document. Raw data,  
386 created datasets and R scripts are available via Figshare:

387 [https://figshare.com/projects/Artificial\\_light\\_at\\_night\\_shifts\\_the\\_circadian\\_system\\_but\\_still\\_leads](https://figshare.com/projects/Artificial_light_at_night_shifts_the_circadian_system_but_still_leads_to_physiological_disruption_in_a_wild_bird/88841)  
388 [to\\_physiological\\_disruption\\_in\\_a\\_wild\\_bird/88841](https://figshare.com/projects/Artificial_light_at_night_shifts_the_circadian_system_but_still_leads_to_physiological_disruption_in_a_wild_bird/88841)).

389

390 *Animals and experimental design*

391 We studied 34 hand-raised, adult male great tits that were kept in individual cages (90 × 50 × 40 cm)  
392 under simulated natural daylength and ambient temperature of 10 to 14 °C with *ad libitum* access to  
393 food and water, as described in (30).

394 The experiment started on February 1<sup>st</sup>, 2014, when daylength was fixed at 8 h 15 min light  
395 and 15 h 45 min darkness. During the day, all birds were exposed to full spectrum daylight by high  
396 frequency fluorescent lights emitting ~1000 lx at perch level (Activa 172, Philips, Eindhoven, the  
397 Netherlands). During the night, birds were assigned to four treatment groups exposed to nocturnal  
398 light intensity of 0 lx (n = 13), 0.5 lx (n = 7), 1.5 lx (n = 7), or 5 lx (n = 7). In composing these groups, we  
399 prioritized assigning birds to the dark night group to obtain reliable benchmark data on day-night  
400 differences in gene expression. Lights were provided by warm white LED light (Philips, Eindhoven,  
401 The Netherlands; for details on the spectral composition of lights, see (22)).

402 On Feb 20<sup>th</sup> an initial blood sample (~200 µl) was collected from all birds at mid-day for  
403 metabolomic profiling. On Feb 22<sup>nd</sup> birds were randomly assigned to mid-day or midnight groups for  
404 culling to collect tissues for morphological and molecular analyses. The mid-day group was culled on  
405 Feb 22<sup>nd</sup>, whereas culling of the midnight group was divided over two subsequent nights (Feb 22<sup>nd</sup>:  
406 12 birds; Feb 23<sup>rd</sup>: 10 birds). Blood was again collected for metabolomic profiling.

407 All experimental procedures were carried out under license NIOO 13.11 of the Animal  
408 Experimentation Committee (DEC) of the Royal Netherlands Academy of Arts and Sciences.

409

410 *Locomotor activity*

411 Daily activity patterns of each individual bird were measured continuously using micro-switches  
412 recorded by a computer, as described in de Jong et al (22). See Supporting Information for more  
413 details.

414

415



416 *Gene expression analyses*

417 After culling, organs were extracted, snap-frozen on dry ice, and stored at  $-80^{\circ}\text{C}$  within 10 min of  
418 capture.

419 Brain tissue was cut on a cryostat at  $-20^{\circ}\text{C}$ . We cut sagittal sections throughout the brain  
420 (Fig. S1). The hypothalamus and hippocampus were located by the use of the Zebrafish atlas ZEBRA  
421 (Oregon Health & Science University, Portland, OR, USA; <http://www.zebrafinchatlas.org>) and  
422 isolated from the frozen brain sections either by surgical punches for the hypothalamus (Harris Uni-  
423 Core, 3.0 mm), or by scraping the relevant tissue with forceps, for the hippocampus. For the  
424 hypothalamus, the edge of the circular punch was positioned adjacent to the midline and ventral  
425 edge of the section, just above the optic chiasm, following the procedure of (66). Hypothalamic and  
426 hippocampal tissue was then immediately added to separate 1.5ml buffer tubes provided by the  
427 Qiagen RNeasy micro extraction kit (see below), homogenized and stored at  $-80^{\circ}\text{C}$  until extraction.

428 Whole spleens were homogenized with a ryboliser and added to 1.5 ml RNeasy micro buffer  
429 and stored at  $-80^{\circ}\text{C}$ . For livers, we cut 0.5 g of tissue from each individual liver, homogenized it and  
430 added it to 1.5 ml RNeasy micro buffer and stored it at  $-80^{\circ}\text{C}$ . RNA was extracted using the RNeasy  
431 micro extraction kit and reverse transcribed it to generate cDNA using a standard kit following the  
432 manufacturer's instructions (Superscript III, Invitrogen).

433 We selected exemplary genes known to be involved in circadian timing, seasonal timing, and  
434 in metabolic, immune and endocrine function (Table S1). We analyzed the core clock gene *BMAL1* in  
435 all tissues as our primary clock indicator because of the timing of its expression and because of its  
436 role as central hub for inter-linking molecular pathways (7). We also studied a second core clock  
437 gene, *CRY1*, in a single tissue, and a clock modulator, *CK1 $\epsilon$* , in two tissues. In the hypothalamus, we  
438 also studied two genes involved in seasonal changes (*DIO2*, *FOXP2*), and one metabolic and ageing  
439 gene (*SIRT1*). The second metabolic gene, *NRF1*, was studied in the liver. Two immune genes  
440 represented different pathways (*LY86*, *TLR4*). Finally, we studied endocrine genes involved in stress  
441 signaling in the Hippocampus (*NR3C1* (*alias GR*), *NR3C2* (*alias MR*)) and in tissue homeostasis (*IGF1*),

442 as well as reference genes (for full details see Table S1). Primers were built based on the great tit  
443 reference genome build 1.1 ([https://www.ncbi.nlm.nih.gov/assembly/GCF\\_001522545.2](https://www.ncbi.nlm.nih.gov/assembly/GCF_001522545.2)) (33) and  
444 annotation release 101 ([https://www.ncbi.nlm.nih.gov/genome/annotation\\_euk/Parus\\_major/101/](https://www.ncbi.nlm.nih.gov/genome/annotation_euk/Parus_major/101/)).  
445 Primer design was conducted with Geneious version 10.0.2 (67).

446 Amplification efficiency of each primer pair was determined through quantitative real-time  
447 polymerase chain reaction (RT-qPCR). RT-qPCR was performed on duplicate samples by a 5-point  
448 standard curve. We used reference gene levels to correct for variation in PCR efficiency between  
449 samples. Reference gene expression stability was calculated using the application geNorm (68), from  
450 which we identified the best pair of reference genes for each tissue. Absolute amounts of cDNA were  
451 calculated by conversion of the Ct values ( $C \times E^{-Ct}$ , with  $C=10^{10}$  and  $E=2$ ) (69). The absolute amounts of  
452 the candidate genes were then normalized by division by the geometric mean of the absolute  
453 amounts of the reference genes. This step yielded relative mRNA expression levels of the candidate  
454 genes. For more details, see the Supporting Information document.

455

#### 456 *Metabolomics analysis*

457 See Supporting information for initial sample preparation and for additional details. All samples were  
458 analyzed on a Thermo Scientific QExactive Orbitrap mass spectrometer running in positive/negative  
459 switching mode. Mass spectrometry data were processed using a combination of XCMS 3.2.0 and  
460 MZMatch.R 1.0–4 (70). Unique signals were extracted using the centwave algorithm (71) and  
461 matched across biological replicates based on mass to charge ratio and retention time. The final peak  
462 set was converted to text for use with IDEOM v18 (72), and filtered on the basis of signal to noise  
463 score, minimum intensity and minimum detections, resulting in a final dataset of 755 metabolites.

464

465

466

467

468 *Statistical analysis*

469 All statistical analyses were conducted in R, version 3.63 (73). In all models we included treatment as  
470 log-transformed light intensity (adding a constant to avoid zero). Details of all statistical analyses can  
471 be seen in the Supporting Information document.

472 To analyze locomotor activity data (i.e. perch-hopping), we first divided the time series of  
473 activity into an unstable phase and stable phase (see Supporting information). We used the data in  
474 the unstable phase to quantify circadian period length ( $\tau$ ) for each bird, then tested treatment  
475 effects using a gaussian linear model (LM). The data in the stable phase were used to test for  
476 variation in the proportion of time spent active every hour depending on treatment, using a  
477 generalized additive mixed model (GAMM). Finally, we tested for variation in onset time, offset time,  
478 nocturnal activity and total daily activity using separate linear mixed models (LMMs).

479 To examine variation in relative transcript levels, we ran LMs including ALAN treatment,  
480 sampling time (two-level factor, day and night), and their interaction as explanatory variables, and  
481 mRNA expression levels of the different genes in the different tissues as response variables. Similar  
482 models were used to test for relationships in mRNA levels between the same gene in different  
483 tissues, or different genes in the same tissue.

484 To test for variation in the levels of the individual metabolites identified by the LC-MS, we  
485 used all data, including the replicated mid-day samples (total  $n = 64$ ). We ran independent LMMs for  
486 each metabolite, with metabolite levels as response variable (log transformed and normalized), and  
487 treatment, time of day and their interaction as explanatory variables. Moreover, we ran two principal  
488 component analyses using only the 73 metabolites found to be significantly affected by the  
489 treatment\*time interaction in the LMMs described above. The two PCAs were run separately for the  
490 individual samples collected at mid-day or midnight. We then used the first two principal  
491 components (PC1 and PC2) of the midnight based PCA as explanatory variables in two LMs with onset  
492 and offset of activity as response variables, respectively.

493

## 494 **Acknowledgments**

495 This work was supported by a Wellcome Trust grant to B.H and D.M.D [097821/Z/11/Z], a Marie-  
496 Curie Career Integration Grant to B.H. (ECCIG (618578) Wildclocks) and the Dutch Technology  
497 Foundation (STW). We thank Kamiel Spoelstra, Takashi Yoshimura and Bill Schwartz for fruitful  
498 discussions on the results of this study.

499

## 500 **References**

- 501 1. R. G. Foster, L. Kreitzmann, *Rhythms of life: The biological clocks that control the daily lives of every*  
502 *living thing* (Yale University Press, 2004).
- 503 2. B. Helm, *et al.*, Two sides of a coin: Ecological and chronobiological perspectives of timing in the wild.  
504 *Philos. Trans. R. Soc. B Biol. Sci.* **372** (2017).
- 505 3. F. Falchi, *et al.*, The new world atlas of artificial night sky brightness. *Sci. Adv.* **2**, e1600377–e1600377  
506 (2016).
- 507 4. T. W. Davies, T. Smyth, Why artificial light at night should be a focus for global change research in the  
508 21st century. *Glob. Chang. Biol.*, early view (2017).
- 509 5. J. C. Borniger, Y. M. Cisse, Surbhi, R. J. Nelson, Reciprocal Regulation of Circadian Rhythms and Immune  
510 Function. *Curr. Sleep Med. Reports* **3**, 93–103 (2017).
- 511 6. G. Caratti, *et al.*, REVERBa couples the circadian clock to hepatic glucocorticoid action. *J. Clin. Invest.*  
512 **128**, 4454–4471 (2018).
- 513 7. A. Ribas-Latre, K. Eckel-Mahan, Interdependence of nutrient metabolism and the circadian clock  
514 system: Importance for metabolic health. *Mol. Metab.* **5**, 133–152 (2016).
- 515 8. D. M. Dominoni, R. J. Nelson, Artificial light at night as an environmental pollutant: An integrative  
516 approach across taxa, biological functions, and scientific disciplines. *J. Exp. Zool. Part A Ecol. Integr.*  
517 *Physiol.* **329** (2018).
- 518 9. C. Vetter, Circadian disruption: What do we actually mean? *Eur. J. Neurosci.* **51**, 531–550 (2020).
- 519 10. J. Falcón, *et al.*, Exposure to Artificial Light at Night and the Consequences for Flora, Fauna, and  
520 Ecosystems. *Front. Neurosci.* **14**, 1183 (2020).
- 521 11. J. Q. Ouyang, *et al.*, Restless roosts – light pollution affects behavior, sleep and physiology in a free-

- 522 living songbird. *Glob. Chang. Biol.*, 1–8 (2017).
- 523 12. E. Knop, *et al.*, Artificial light at night as a new threat to pollination. *Nature* (2017)
- 524 <https://doi.org/10.1038/nature23288>.
- 525 13. D. Dominoni, M. Quetting, J. Partecke, Artificial light at night advances avian reproductive physiology.
- 526 *Proc. R. Soc. B Biol. Sci.* **280**, 20123017 (2013).
- 527 14. D. M. M. Dominoni, B. Helm, M. Lehmann, H. B. B. Dowse, J. Partecke, Clocks for the city: circadian
- 528 differences between forest and city songbirds. *Proc. R. Soc. London B Biol. Sci.* **280**, 20130593 (2013).
- 529 15. T. Batra, I. Malik, V. Kumar, Illuminated night alters behaviour and negatively affects physiology and
- 530 metabolism in diurnal zebra finches. *Environ. Pollut.* **254**, 112916 (2019).
- 531 16. T. Batra, I. Malik, A. Prabhat, S. K. Bhardwaj, V. Kumar, Sleep in unnatural times: illuminated night
- 532 negatively affects sleep and associated hypothalamic gene expressions in diurnal zebra finches. *Proc. R.*
- 533 *Soc. B Biol. Sci.* **287**, 20192952 (2020).
- 534 17. Y. Yang, Q. Liu, T. Wang, J. Pan, Light pollution disrupts molecular clock in avian species: A power-
- 535 calibrated meta-analysis. *Environ. Pollut.*, 114206 (2020).
- 536 18. V. Van Der Vinne, *et al.*, Cold and hunger induce diurnality in a nocturnal mammal. *Proc. Natl. Acad. Sci.*
- 537 *U. S. A.* **111**, 15256–15260 (2014).
- 538 19. J. Q. Ouyang, S. Davies, D. Dominoni, Hormonally mediated effects of artificial light at night on behavior
- 539 and fitness: linking endocrine mechanisms with function. *J. Exp. Biol.* **221**, jeb156893 (2018).
- 540 20. S. Moaraf, *et al.*, Artificial light at night affects brain plasticity and melatonin in birds. *Neurosci. Lett.*
- 541 **716**, 134639 (2020).
- 542 21. C. R. C. Moreno, K. Wright, D. J. Skene, F. M. Louzada, Phenotypic plasticity of circadian entrainment
- 543 under a range of light conditions. *Neurobiol. Sleep Circadian Rhythm.* **9**, 100055 (2020).
- 544 22. M. de Jong, *et al.*, Dose-dependent responses of avian daily rhythms to artificial light at night. *Physiol.*
- 545 *Behav.* **155**, 172–179 (2016).
- 546 23. J. Sun, T. Raap, R. Pinxten, M. Eens, Artificial light at night affects sleep behaviour differently in two
- 547 closely related songbird species. *Environ. Pollut.* **231**, 882–889 (2017).
- 548 24. K. Spoelstra, I. Verhagen, D. Meijer, M. E. Visser, Artificial light at night shifts daily activity patterns but
- 549 not the internal clock in the great tit (*Parus major*). *Proc. R. Soc. B Biol. Sci.* **285**, 20172751 (2018).
- 550 25. Z. N. Ulgezen, *et al.*, The preference and costs of sleeping under light at night in forest and urban great

- 551 tits. *Proc. R. Soc. B Biol. Sci.* **286**, 20190872 (2019).
- 552 26. T. Raap, R. Pinxten, M. Eens, Light pollution disrupts sleep in free-living animals. *Sci. Rep.* **5**, 13557  
553 (2015).
- 554 27. D. Dominoni, M. Quetting, J. Partecke, Artificial light at night advances avian reproductive physiology.  
555 *Proc. R. Soc. B Biol. Sci.* **280** (2013).
- 556 28. D. M. D. Dominoni, E. O. E. Carmona-Wagner, M. Hofmann, B. Kranstauber, J. Partecke, Individual-  
557 based measurements of light intensity provide new insights into the effects of artificial light at night on  
558 daily rhythms of urban-dwelling songbirds. *J. Anim. Ecol.* **83**, 681–692 (2014).
- 559 29. V. M. Cassone, J. K. Paulose, C. E. Harpole, Y. Li, M. Whitfield-Rucker, “Avian circadian organization” in  
560 *Biological Timekeeping: Clocks, Rhythms and Behaviour*, (Springer (India) Private Ltd., 2017), pp. 241–  
561 256.
- 562 30. D. Dominoni, *et al.*, Dose-response effects of light at night on the reproductive physiology of great tits  
563 (*Parus major*): Integrating morphological analyses with candidate gene expression. *J. Exp. Zool. Part A*  
564 *Ecol. Integr. Physiol.* **2018**, 1–15 (2018).
- 565 31. S. K. Davies, *et al.*, Effect of sleep deprivation on the human metabolome. *Proc. Natl. Acad. Sci.* **111**,  
566 10761–10766 (2014).
- 567 32. H. Watson, E. Videvall, M. N. Andersson, C. Isaksson, Transcriptome analysis of a wild bird reveals  
568 physiological responses to the urban environment. *Sci. Rep.* **7**, 1–10 (2017).
- 569 33. V. N. Laine, *et al.*, Evolutionary signals of selection on cognition from the great tit genome and  
570 methylome. *Nat. Commun.* **7**, 10474 (2016).
- 571 34. P. Capilla-Lasheras, *et al.*, Elevated Immune Gene Expression Is Associated with Poor Reproductive  
572 Success of Urban Blue Tits. *Front. Ecol. Evol.* **5**, 64 (2017).
- 573 35. T. Kasukawa, *et al.*, Human blood metabolite timetable indicates internal body time. *Proc. Natl. Acad.*  
574 *Sci. U. S. A.* **109**, 15036–15041 (2012).
- 575 36. E. E. Laing, *et al.*, Blood transcriptome based biomarkers for human circadian phase. *Elife* **6** (2017).
- 576 37. B. Helm, M. E. Visser, Heritable circadian period length in a wild bird population. *Proc. R. Soc. B Biol. Sci.*  
577 **277**, 3335–3342 (2010).
- 578 38. H.-C. Chang, L. Guarente, SIRT1 Mediates Central Circadian Control in the SCN by a Mechanism that  
579 Decays with Aging. *Cell* **153**, 1448–1460 (2013).

- 580 39. A. K. Trivedi, J. Kumar, S. Rani, V. Kumar, Annual life history-dependent gene expression in the  
581 hypothalamus and liver of a migratory songbird: Insights into the molecular regulation of seasonal  
582 metabolism. *J. Biol. Rhythms* **29**, 332–345 (2014).
- 583 40. D. J. Creek, *et al.*, Toward global metabolomics analysis with hydrophilic interaction liquid  
584 chromatography-mass spectrometry: Improved metabolite identification by retention time prediction.  
585 *Anal. Chem.* **83**, 8703–8710 (2011).
- 586 41. J. Chong, *et al.*, MetaboAnalyst 4.0: Towards more transparent and integrative metabolomics analysis.  
587 *Nucleic Acids Res.* **46**, W486–W494 (2018).
- 588 42. D. M. D. Dominoni, W. Goymann, B. Helm, J. Partecke, Urban-like night illumination reduces melatonin  
589 release in European blackbirds (*Turdus merula*): implications of city life for biological time-keeping of  
590 songbirds. *Front. Zool.* **10**, 60 (2013).
- 591 43. B. Kempenaers, P. Borgström, P. Loës, E. Schlicht, M. Valcu, Artificial night lighting affects dawn song,  
592 extra-pair siring success, and lay date in songbirds. *Curr. Biol.* **20**, 1735–1739 (2010).
- 593 44. D. M. Dominoni, J. A. H. Smit, M. E. Visser, W. Halfwerk, Multisensory pollution: Artificial light at night  
594 and anthropogenic noise have interactive effects on activity patterns of great tits (*Parus major*).  
595 *Environ. Pollut.*, 113314 (2019).
- 596 45. A. Da Silva, J. Samplonius, E. Schlicht, M. Valcu, B. Kempenaers, Artificial night lighting rather than  
597 traffic noise affects the daily timing of dawn and dusk singing in common European songbirds. *Behav.*  
598 *Ecol.* **25**, 1037–1047 (2014).
- 599 46. Z. Renthlei, A. K. Trivedi, Effect of urban environment on pineal machinery and clock genes expression  
600 of tree sparrow (*Passer montanus*). *Environ. Pollut.* **255**, 113278 (2019).
- 601 47. Z. Renthlei, B. K. Borah, T. Gurumayum, A. K. Trivedi, Season dependent effects of urban environment  
602 on circadian clock of tree sparrow (*Passer montanus*). *Photochem. Photobiol. Sci.* (2020)  
603 <https://doi.org/10.1039/d0pp00257g> (December 9, 2020).
- 604 48. F. Gwinner, Testosterone Induces “Splitting” of Circadian Locomotor Activity Rhythms in Birds. *Science*  
605 (80-. ). **185**, 72–74 (1974).
- 606 49. S. N. Archer, *et al.*, PNAS Plus: From the Cover: Mistimed sleep disrupts circadian regulation of the  
607 human transcriptome. *Proc. Natl. Acad. Sci.* **111**, E682–E691 (2014).
- 608 50. D. J. Skene, *et al.*, Separation of circadian- and behavior-driven metabolite rhythms in humans provides

- 609 a window on peripheral oscillators and metabolism. *Proc. Natl. Acad. Sci. U. S. A.* **115**, 7825–7830  
610 (2018).
- 611 51. S. M. Morris, Arginine: Master and commander in innate immune responses. *Sci. Signal.* **3**, pe27–pe27  
612 (2010).
- 613 52. S. M. Morris, Enzymes of arginine metabolism in *Journal of Nutrition*, (American Institute of Nutrition,  
614 2004), pp. 2743S-2747S.
- 615 53. J. B. Clark, N-acetyl aspartate: A marker for neuronal loss or mitochondrial dysfunction in  
616 *Developmental Neuroscience*, (Dev Neurosci, 1998), pp. 271–276.
- 617 54. S. D. Yelamanchi, *et al.*, A pathway map of glutamate metabolism. *J. Cell Commun. Signal.* **10**, 69–75  
618 (2016).
- 619 55. S. M. Morris, Arginine metabolism revisited. *J. Nutr.* **146**, 2579S-2586S (2016).
- 620 56. S. K. T. Taufique, A. Prabhat, V. Kumar, Illuminated night alters hippocampal gene expressions and  
621 induces depressive-like responses in diurnal corvids. *Eur. J. Neurosci.* **48**, 3005–3018 (2018).
- 622 57. S. K. T. Taufique, A. Prabhat, V. Kumar, Constant light environment suppresses maturation and reduces  
623 complexity of new born neuron processes in the hippocampus and caudal nidopallium of a diurnal  
624 corvid: Implication for impairment of the learning and cognitive performance. *Neurobiol. Learn. Mem.*  
625 **147**, 120–127 (2018).
- 626 58. M. E. Kernbach, *et al.*, Light pollution increases West Nile virus competence of a ubiquitous passerine  
627 reservoir species. *Proc. R. Soc. B Biol. Sci.* **286**, 20191051 (2019).
- 628 59. C. C. M. Kyba, *et al.*, Artificially lit surface of Earth at night increasing in radiance and extent. *Sci. Adv.* **3**,  
629 e1701528 (2017).
- 630 60. A. Bruening, F. Hölker, S. Franke, T. Preuer, W. Kloas, Spotlight on fish: Light pollution affects circadian  
631 rhythms of European perch but does not cause stress. *Sci. Total Environ.* **511**, 516–522 (2015).
- 632 61. K. J. Gaston, T. W. Davies, J. Bennie, J. Hopkins, REVIEW: Reducing the ecological consequences of  
633 night-time light pollution: options and developments. *J. Appl. Ecol.* **49**, 1256–1266 (2012).
- 634 62. D. Dominoni, J. Borniger, R. Nelson, Light at night, clocks and health: from humans to wild organisms.  
635 *Biol. Lett.* **12**, 20160015 (2016).
- 636 63. J. Bennie, T. W. Davies, D. Cruse, K. J. Gaston, Ecological effects of artificial light at night on wild plants.  
637 *J. Ecol.* **104**, 611–620 (2016).



- 638 64. F. van Langevelde, *et al.*, Declines in moth populations stress the need for conserving dark nights. *Glob.*  
639 *Chang. Biol.* **24**, 925–932 (2018).
- 640 65. D. Paksarian, *et al.*, Association of Outdoor Artificial Light at Night with Mental Disorders and Sleep  
641 Patterns among US Adolescents. *JAMA Psychiatry* (2020)  
642 <https://doi.org/10.1001/jamapsychiatry.2020.1935> (August 27, 2020).
- 643 66. N. Perfito, *et al.*, Anticipating spring: Wild populations of great tits (*Parus major*) differ in expression of  
644 key genes for photoperiodic time measurement. *PLoS One* **7** (2012).
- 645 67. M. Kearse, *et al.*, Geneious Basic: An integrated and extendable desktop software platform for the  
646 organization and analysis of sequence data. *Bioinformatics* **28**, 1647–1649 (2012).
- 647 68. J. Vandesompele, *et al.*, Accurate normalization of real-time quantitative RT-PCR data by geometric  
648 averaging of multiple internal control genes. *Genome Biol.* **3**, research0034.1 (2002).
- 649 69. F. Dijk, E. Kraal-Muller, W. Kamphuis, Ischemia-Induced Changes of AMPA-Type Glutamate Receptor  
650 Subunit Expression Pattern in the Rat Retina: A Real-Time Quantitative PCR Study. *Investig.*  
651 *Ophthalmol. Vis. Sci.* **45**, 330–341 (2004).
- 652 70. R. A. Scheltema, A. Jankevics, R. C. Jansen, M. A. Swertz, R. Breitling, PeakML/mzMatch: A file format,  
653 Java library, R library, and tool-chain for mass spectrometry data analysis. *Anal. Chem.* **83**, 2786–2793  
654 (2011).
- 655 71. R. Tautenhahn, C. Bottcher, S. Neumann, Highly sensitive feature detection for high resolution LC/MS.  
656 *BMC Bioinformatics* **9**, 1–16 (2008).
- 657 72. D. J. Creek, A. Jankevics, K. E. V. Burgess, R. Breitling, M. P. Barrett, IDEOM: An Excel interface for  
658 analysis of LC-MS-based metabolomics data. *Bioinformatics* **28**, 1048–1049 (2012).
- 659 73. R Development Core Team, R: A language and environment for statistical computing. URL [http://www.](http://www.R-project.org)  
660 *R-project.org* (2015).

661 **Figures and Tables**

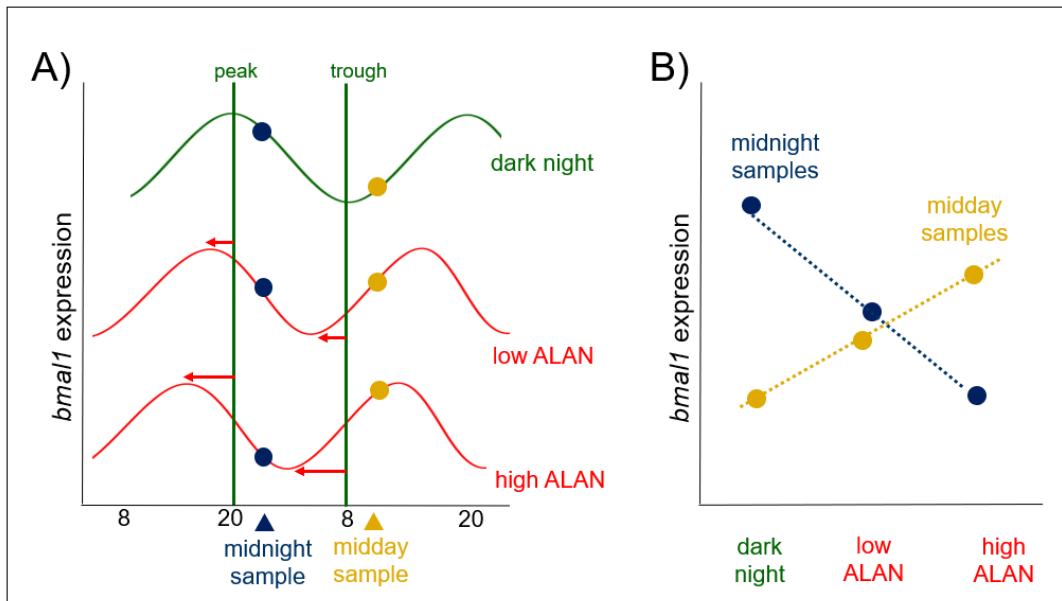

662

663 **Figure 1. Expected clock gene rhythm advance in response to ALAN.** Schematic shows ALAN effects  
664 on transcript levels of *BMAL1* measured at midnight (blue) and mid-day (yellow). (A) Rhythm of ALAN  
665 under dark night shown as green curve; if the gene's rhythm advances (red curves) with increasing  
666 ALAN, transcript levels sampled at midnight will drop, whereas those measured at mid-day will rise;  
667 horizontal arrows indicate the advance of the *BMAL1* peak. (B) The trends of transcripts with  
668 increasing ALAN therefore cross for mid-day vs. midnight sampling.

669

670

671

672

673

674

675

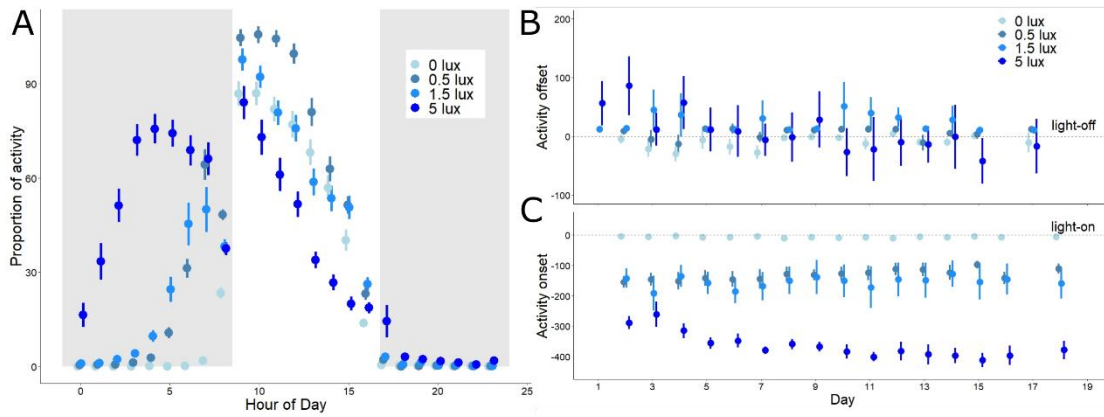

676

677 **Figure 2. Activity timing is affected by intensity of light at night.** The proportion of active 2-min  
678 intervals in each treatment group per hour of the day is shown in panel (A) (raw mean  $\pm$  SEM, N =  
679 34). Grey background indicates night-time, white background indicates daytime. On the right, we  
680 show daily treatment group data (mean  $\pm$  SEM), for the timing of (A) evening offset and (B) morning  
681 onset of activity (time in min). Activity onset and offset refer to times of lights-on and lights-off,  
682 which are shown as the horizontal lines crossing zero in both panels.

683

684

685

686

687

688

689

690

691

692

693

694

695

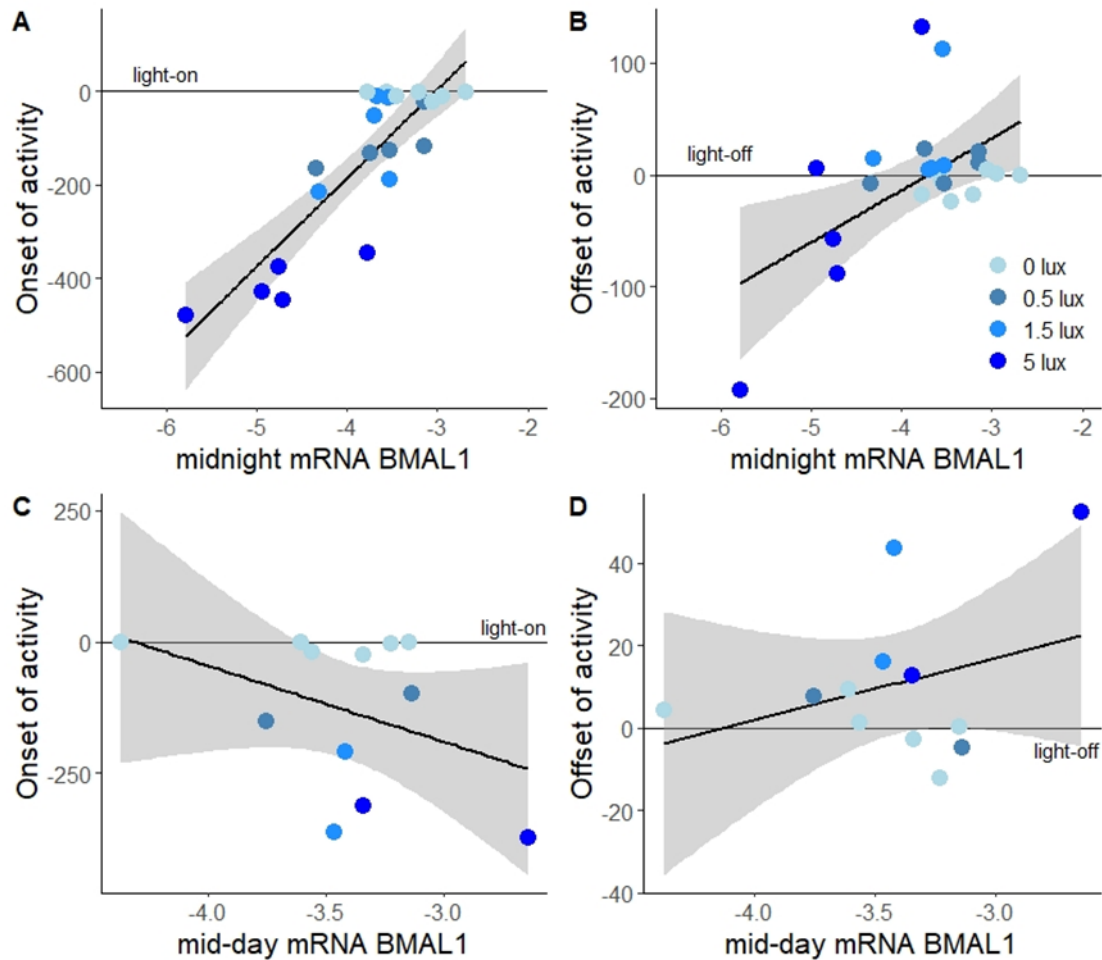

696

697 **Figure 3. *BMAL1* expression in the hypothalamus predicts the advance of morning activity.** mRNA  
698 levels of *BMAL1* at midnight correlated with the onset (A) and offset of activity (B), but mid-day levels  
699 (C, D) did not. Shown are log-transformed mRNA levels, separated by sampling time (day vs night)  
700 and ALAN treatments (blue color gradient). Points represent individual birds (total N = 34), lines and  
701 shaded areas represent model fits  $\pm$  95% confidence intervals.

702

703

704

705

706

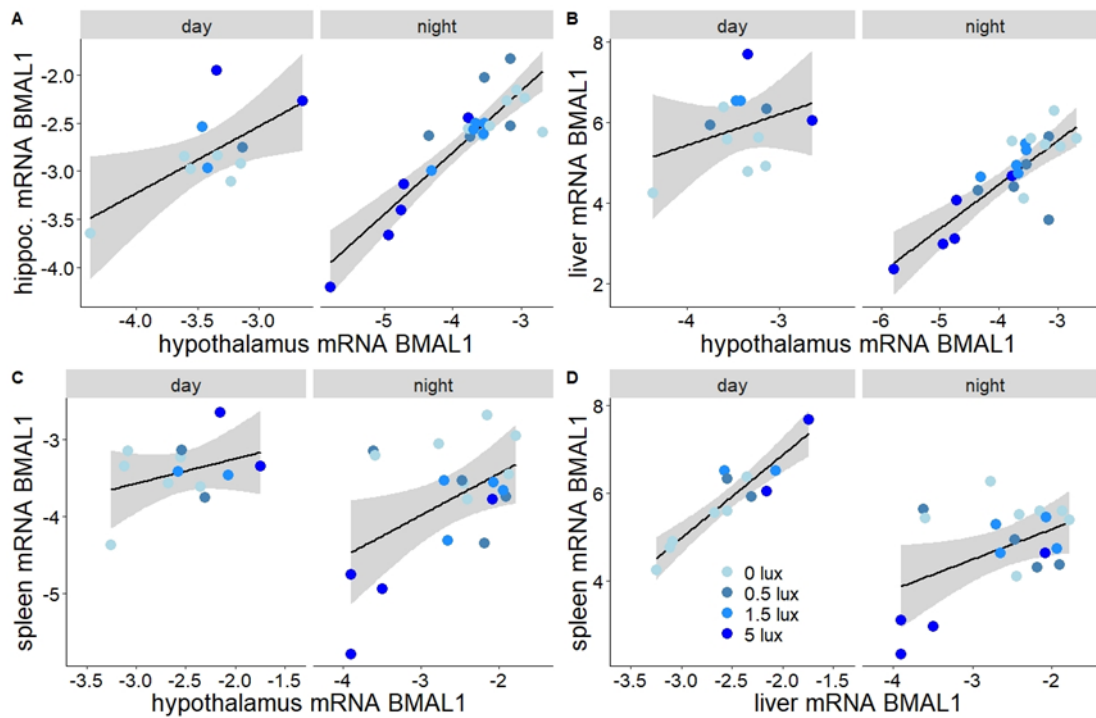

707

708 **Figure 4. ALAN effects on *BMAL1* expression were comparable in different tissues.** Correlation of

709 expression patterns of *BMAL1* in different tissues. Shown are log-transformed mRNA levels,

710 separated by sampling time (day vs night) and ALAN treatments (blue color gradient). Points

711 represent individual birds (N = 34). Lines and shaded areas depict model estimated means  $\pm$  95%

712 confidence intervals. Panels show expression levels of hypothalamic *BMAL1* levels in relation to (A)

713 hippocampus, (B) liver and (C) spleen levels, as well as spleen in relation to liver levels (D).

714

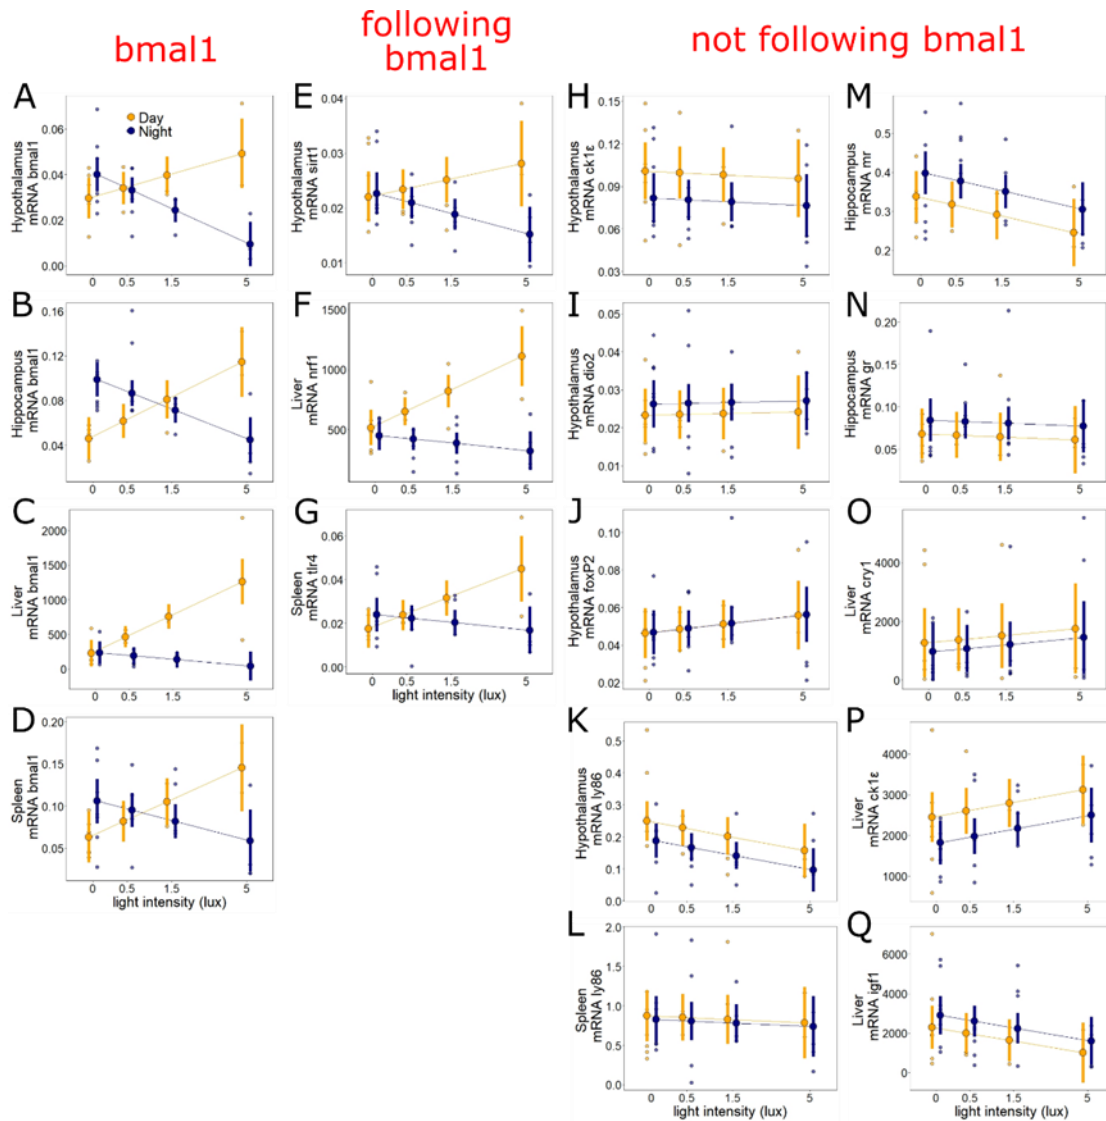

715

716 **Figure 5. ALAN effects on gene expression are gene-specific.** ALAN does not equally affect all  
 717 physiological systems. ALAN effects on *BMAL1* (A)-(D) were paralleled by those on three additional  
 718 genes in the hypothalamus (*SIRT1*), liver (*NRF1*) and spleen (*TLR4*) (E)-(G), but not by other genes  
 719 analyzed across tissues (H)-(Q). Shown are log-transformed mRNA levels, separated by sampling time  
 720 (mid-day: yellow; midnight: dark blue). Large symbols  $\pm$  SEM connected by lines represent model  
 721 estimates, whereas small symbols depict raw data points (N = 34 birds).

722

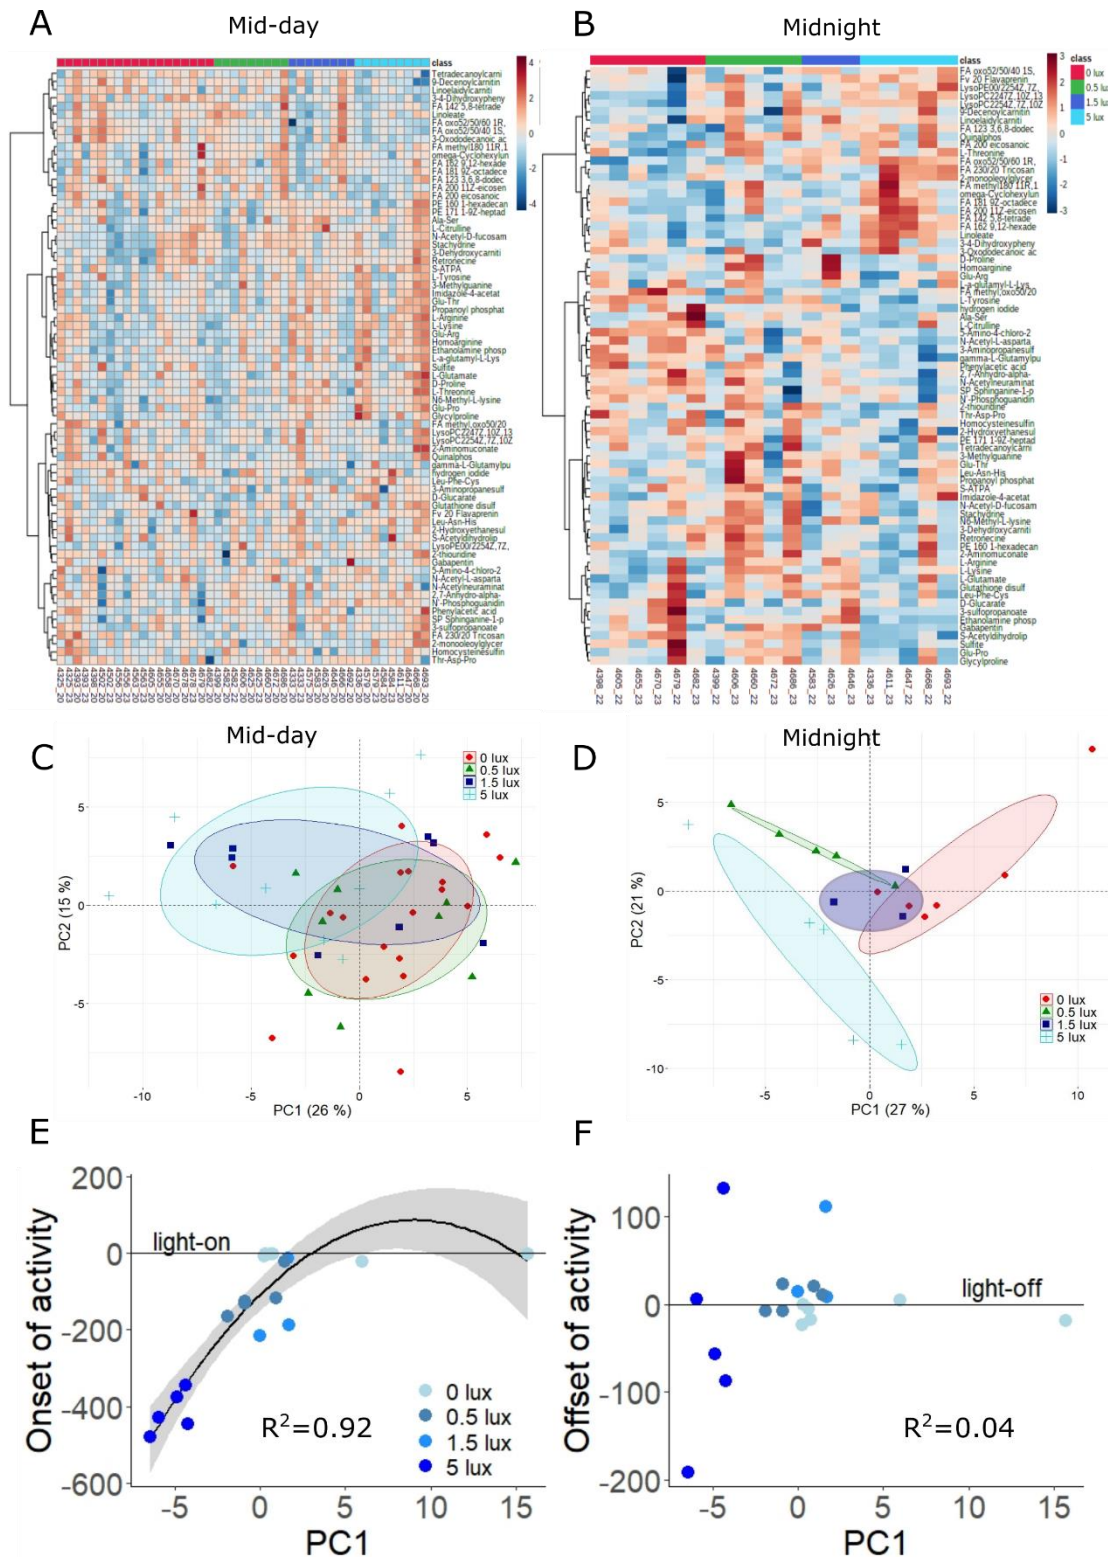

723

724 **Figure 6. Metabolomics analysis supports ALAN-induced shifts in day-night physiology.** The 73

725 metabolites found to be significantly affected by the interaction of treatment and sampling time (9.6%

726 of all metabolites, interactive dataset) were dissected by means of pathway analysis and principal

727 component analysis. Pathway analysis revealed that the Arginine Biosynthesis pathway was

728 particularly enriched in this dataset. Heatmaps show the top-25 metabolites in the interactive dataset  
729 at either mid-day (A) or mid-night (B). Principal component analysis showed considerable overlap  
730 between ALAN groups at mid-day (C), whereas ALAN treatment effects were mostly visible at midnight,  
731 particularly for the 5 lx group (D). In all PCA plots, points represent individual samples, and ellipses  
732 contain 80% of samples in a group. The first PC of the night cluster (E) significantly predicted the onset  
733 of activity in the morning (D), but not the offset of activity in the evening (F). In (E) and (F) points  
734 represent individual birds (N = 19), and lines and shaded areas represent model fits  $\pm$  95% confidence  
735 intervals.

736

737

738

739

740

741

742

743

744

745

746

747

748

749

750

751

752

753



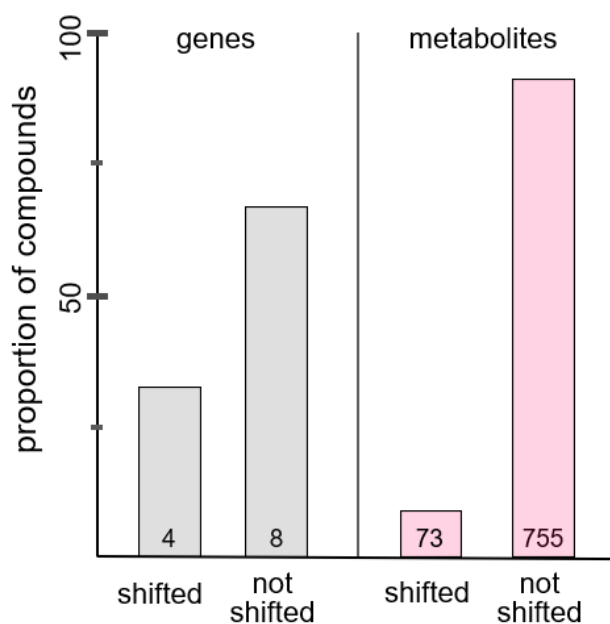

754

755 **Figure 7. Proportion of shifts in day-night pattern in response to ALAN.** Shown are proportions of  
756 genes (grey) and metabolites (red) whose levels were, or were not, significantly impacted by the  
757 interaction of sampling time and ALAN level.

758

759

760

761

762

763

764

765

766

767

768

769

770

771

772

773

774 **Supplementary information for:**

775 Artificial light at night shifts the circadian system but still leads to physiological  
776 disruption in a wild bird

777 Davide M. Dominoni<sup>1,2,\*</sup>, Maaïke de Jong<sup>2,3</sup>, Kees van Oers<sup>2</sup>, Peter O’Shaughnessy<sup>1</sup>, Gavin  
778 Blackburn<sup>4</sup>, Els Atema<sup>2</sup>, Christa A. Mateman<sup>2</sup>, Pietro B. D’Amelio<sup>5,6,7</sup>, Lisa Trost<sup>5</sup>, Michelle  
779 Bellingham<sup>1</sup>, Jessica Clark<sup>1</sup>, Marcel E. Visser<sup>2,8</sup>, Barbara Helm<sup>1,8</sup>

780

781 \* Davide M. Dominoni

782 Email: [davide.dominoni@glasgow.ac.uk](mailto:davide.dominoni@glasgow.ac.uk)

783

784 **This PDF file includes:**

785 Detailed methods

786 Supplementary References

787 Figures S1-S8

788 Tables S1-S13

789 **Other supplementary materials for this manuscript include the following:**

790 All datasets and R scripts to reproduce the results of this study are available in  
791 Figshare:

792 [https://figshare.com/projects/Artificial\\_light\\_at\\_night\\_shifts\\_the\\_circadian\\_system\\_but\\_stil  
793 l\\_leads\\_to\\_physiological\\_disruption\\_in\\_a\\_wild\\_bird/88841](https://figshare.com/projects/Artificial_light_at_night_shifts_the_circadian_system_but_still_leads_to_physiological_disruption_in_a_wild_bird/88841)).

794

795

796

797

798

799

800

801

802

803

804

## 805 **Supplementary material and methods**

### 806 *Animals and experimental design*

807 We conducted the experiment between February 1 and February 23, 2014, as described elsewhere  
808 for these same birds (1). We used 34 adult male great tits that had been used in a previous  
809 experiment aimed at assessing the impact of different levels of light intensity at night on daily activity  
810 and physiology (2). All birds had been hand-raised and housed at the Netherlands Institute of Ecology  
811 (NIOO KNAW), Wageningen, The Netherlands, in indoor-facilities in individual cages (90 × 50 × 40  
812 cm). All birds were between 1 and 4 years of age (hatched in 2012 or before), but mean age did not  
813 differ significantly between treatment ( $P = 0.576$ ). Temperature was maintained between 10 and 14  
814 °C, and did not vary between day- and night-time. Birds had access to food and water ad libitum. We  
815 used dividers between the cages, so that birds could only hear but not see each other, and light from  
816 one cage did not influence the light environment in adjacent cages.

817         During the ALAN experiment, birds were kept under fixed natural day-length of 8 hr 15 min  
818 light and 15 hr 45 min darkness. Each cage had two separate light sources for day- and night-time  
819 illumination. During the day, all birds were exposed to full spectrum daylight by high frequency  
820 fluorescent lights emitting ~1000 lux at perch level (Activa 172, Philips, Eindhoven, the Netherlands).  
821 For night-time, birds were assigned to different treatment groups that varied in the level of light  
822 intensity used (warm white LED light; Philips, Eindhoven, The Netherlands). The spectral composition  
823 of this light is shown in Supporting Information Figure S1 of (2), based on an earlier experiment with  
824 these birds. In this earlier experiment, the birds were exposed to five levels of ALAN for one month  
825 between December 10, 2013 and January 10, 2014 and otherwise kept under dark nights. The  
826 experimental setup we used here differed as we used four, and not five experimental levels of ALAN,  
827 of which one now was a dark control (0.00, 0.5, 1.5, and 5 lux). The birds in the dark control were  
828 derived from the two earlier treatment groups with the lowest light intensity (0.05 and 0.15 lux,  
829 respectively), while birds in all other treatments were kept in the same treatment that they were  
830 exposed to in the previous experiment. Thus, from the start of our present experiment on February

831 1, 2014, the birds were exposed for the entire night to either one out of three nocturnal light  
832 intensities measured at perch level in the cages: 0.5 lux (n = 7), 1.5 lux (n = 7), or 5 lux (n = 7), or to  
833 dark control conditions (n = 13) (Table S2).

834 The four treatment groups were assigned to one of seven blocks of cages arranged within  
835 two experimental rooms. Each block contained all treatment groups, distributed using a Latin  
836 Squares design. The birds were kept under these conditions for 3 weeks until culling to collect tissues  
837 for morphological, metabolomic and genetic analyses (see more details on this terminal sampling  
838 below). On Feb 20<sup>th</sup> we collected a blood sample (~200 µl) from all birds for metabolomic profiling.  
839 The randomly assigned mid-day sampling group was culled on Feb 22<sup>nd</sup>, and the midnight group  
840 during the two subsequent nights (Feb 22<sup>nd</sup>: 10 birds; Feb 23<sup>rd</sup>: 12 birds). All experimental procedures  
841 were carried out under license NIOO 13.11 of the Animal Experimentation Committee (DEC) of the  
842 Royal Netherlands Academy of Arts and Sciences.

843

#### 844 *Locomotor activity*

845 A standard wooden perch and a perch with a micro-switch were fitted into every cage before the  
846 start of the experiments. The micro-switch detected perch-hopping and logged the frequency onto a  
847 computer. A signal for on (bird on perch) and off (bird not on perch) was recorded every 0.1 s and  
848 stored in files as 30 s intervals by software developed by T&M Automation (Leidschendam, The  
849 Netherlands). An activity level of either one or zero was obtained for every two minutes, in which a  
850 bird was considered active if the micro-switch was triggered once or more times.

851 In total, we examined four different aspects of activity for each bird over a 24-h period with  
852 the program Chronoshop 1.1 (by K. Spoelstra). Activity onset (the first time point at which activity is  
853 higher than the average) and activity offset (the final time point which activity is higher than the  
854 average) were reported relative to when the daylight was switched on and off, respectively. Total  
855 activity was defined as the total active minutes within a 24-h cycle (from midnight to midnight), while

856 nocturnal activity was defined as the total number of active minutes during the relative night (lights  
857 off until lights on).

858

### 859 *Tissue preparation*

860 We culled birds under isoflurane anesthesia (Forene, Abbott, Hoofddorp, the Netherlands) at mid-  
861 day ( $\pm 2$  hr) on February 22, 2014 or midnight ( $\pm 2$  hr) on February 22 and 23, 2014. Organs were  
862 extracted, snap-frozen on dry ice, and stored at  $-80$  °C within 10 min of capture. The final sample  
863 size is shown in Table S2.

864 The whole brain was cut sagittally on a cryostat at  $-20$  °C, alternating three sections of 40  
865  $\mu\text{m}$  with one section of 60  $\mu\text{m}$ . The 40  $\mu\text{m}$  sections were used to collect tissue for gene expression  
866 analysis, thus after being cut they were temporarily stored again at  $-80$  °C until RNA extraction. The  
867 60- $\mu\text{m}$  sections were immediately Nissl-stained and used as reference, to verify histologically that we  
868 collected tissue from the regions of interest in the 40  $\mu\text{m}$  sections. From the appearance of the  
869 cerebellum in the slides, we collected 120 slices until the disappearance of the cerebellum at the  
870 opposite side, using a total of 90 slices for RNA extraction and 30 slices as reference. The  
871 hypothalamus and hippocampus in the Nissl-stained series were identified by referencing the  
872 Zebrafish atlas ZEBRA (Oregon Health & Science University, Portland, OR, USA;  
873 <http://www.zebrafinchatlas.org>). To isolate the tissue, for the hypothalamus we sampled one 3 mm  
874 of diameter circular tissue punch (Harris Uni-core, Electron Microscopy Sciences, cat#69036) from  
875 each section. We used the optic chiasma, medially, the dorsal supraoptic decussation (rostrally, when  
876 visible), and the optic tract, laterally, as a reference and punched the medial area immediately dorso-  
877 caudal to the optic chiasma (Fig. S1). The collected areas corresponded roughly to the medial basal  
878 suprachiasmatic hypothalamus region which is comprised of several nuclei and areas including the  
879 suprachiasmatic nuclei (SCN). For the hippocampus, we used forceps to remove the tissue from the  
880 medial (enlarged) part of the hippocampus above the lateral ventricle up to the edge of the brain  
881 (Fig. S1). Hypothalamic and hippocampal tissues were then immediately added to separate 1.5ml

882 buffer tubes provided by the Qiagen RNeasy micro extraction kit (see below), homogenized and  
883 stored at -80 °C until extraction.

884 Whole spleens were homogenized with a ryboliser and added to 1.5 ml RNeasy micro buffer  
885 and stored at -80 °C. For livers, we cut 0.5 g of tissue from each individual liver, homogenized it and  
886 added it to 1.5 ml RNeasy micro buffer and stored them at -80 °C.

887

#### 888 *RNA isolation and cDNA synthesis*

889 RNA isolation and cDNA syntheses was conducted in Glasgow. RNA was extracted using the  
890 RNeasy micro extraction kit (Qiagen) following the manufacturer's protocol. RNA quality and quantity  
891 were evaluated using a NanoDrop 2000 spectrophotometer (ThermoFisher Scientific). RNA yield was  
892 used to adjust the concentration for cDNA synthesis. The working RNA concentration was 25 ng/μl.  
893 For each tissue sample, we used 6μl of RNA and reverse transcribed it to generate cDNA using a  
894 standard kit following the manufacturer's instructions (Superscript III, Invitrogen). We tested serially  
895 diluted cDNA samples for each gene of interest to determine an optimal dilution.

896

#### 897 *Primer design*

898 We made a list of genes known to be involved in circadian and seasonal timing, as well as in  
899 metabolism and immune function (Table S1). Similarly, we made a list of reference "housekeeping"  
900 genes to allow normalization of the gene expression. Primers were built based on the great tit  
901 reference genome build 1.1 ([https://www.ncbi.nlm.nih.gov/assembly/GCF\\_001522545.2](https://www.ncbi.nlm.nih.gov/assembly/GCF_001522545.2)) (3) and  
902 annotation release 101 ([https://www.ncbi.nlm.nih.gov/genome/annotation\\_euk/Parus\\_major/101/](https://www.ncbi.nlm.nih.gov/genome/annotation_euk/Parus_major/101/)).  
903 Primer design was conducted with Geneious version 10.0.2 (4). Primers were checked against the  
904 great tit reference genome using a BLAST search to confirm that primers were specific for the  
905 intended target genes. In order to avoid genomic DNA (gDNA) amplification, every primer pair was  
906 designed to span an intron of more than 1000 base pairs. Selected primer pairs for the final  
907 candidate genes are listed in Table S1.

908

909 *RT-qPCR*

910 Amplification efficiency of each primer pair was determined through quantitative real-time  
911 polymerase chain reaction (RT-qPCR). We first analyzed liver samples in Glasgow, measuring  
912 fluorescence with a MX3000 cycler 96-well plates (Stratagene). By the time we could analyze brain  
913 and spleen samples, logistic issues prevented us to run these assays in Glasgow. Thus, we proceeded  
914 with analyses at the NIOO in Wageningen (see below for validation), where fluorescence was  
915 measured with the CFX Connect Real-Time PCR Detection System (Bio-Rad Laboratories). In both  
916 cases, RT-qPCR was performed by a 5-point standard curve based on a 5-dilution series (1:10, 1:20,  
917 1:40, 1:80 and 1:160) of cDNA samples. We included duplicated samples (10  $\mu$ l) for one transcript on  
918 each plate, balancing time points and treatments, using the SYBR Green method (PowerUp SYBR  
919 Green Master Mix, ThermoFisher Scientific). At the end of the amplification phase, a melting curve  
920 analysis was carried out on the products formed. In each plate, we also included duplicate negative  
921 control wells (with RNA instead of cDNA). None of the primer pairs amplified gDNA and the efficiency  
922 of the qPCR reactions was always between 95% and 103%.

923         The PCR efficiency and fractional cycle threshold number obtained in Glasgow and  
924 Wageningen were used for gene quantification. We used reference gene levels to correct for  
925 variation in PCR efficiency and RNA quality between samples. From our list of starting reference  
926 genes, we selected two per tissue to correct candidate (target) gene levels. Reference gene  
927 expression stability was calculated using the application geNorm (5), from which we identified the  
928 best pair of reference genes. Absolute amounts of cDNA were calculated by conversion of the Ct  
929 values ( $C \times E^{-Ct}$ , with  $C=10^{10}$  and  $E=2$ ) (6). The absolute amounts of the candidate genes were  
930 normalized by division by a normalization factor, calculated by taking the geometric mean from the  
931 absolute amounts of the reference genes. We thereby obtained relative mRNA transcript levels of  
932 the candidate genes.

933

934 *Validation of qPCR data obtained in Glasgow and Wageningen*

935 As quantification of qPCR products might be influenced by the machine used for the analyses, we  
936 decided to validate the data produced at the two different laboratories by analysing liver *bmal1*  
937 levels in Wageningen, too. Correlation between Glasgow and Wageningen liver data was highly  
938 significant (Spearman rho: 0.74,  $p < 0.001$ ).

939

940 *Metabolomics*

941 The 68 plasma samples (34 individuals x 2 time points = 68) were first prepared by the following  
942 protocol adjusted for the amount of plasma available (minimally 26  $\mu$ l): 100  $\mu$ l of plasma were mixed  
943 with chloroform and methanol in a 1:3:1 ratio (chloroform : methanol : sample) on a cooled shaker  
944 for one hour and then centrifuged for 3 mins at 13,000g at 4 °C. The resulting supernatant was stored  
945 at -80 °C until LC/MC analysis. All samples were analyzed on a Thermo Scientific QExactive Orbitrap  
946 mass spectrometer running in positive/negative switching mode. This was connected to a Dionex  
947 UltiMate 3000 RSLC system (Thermo Fisher Scientific, Hemel Hempstead, United Kingdom) using a  
948 ZIC-pHILIC column (150 mm  $\times$  4.6 mm, 5  $\mu$ m column, Merck Sequant, Gillingham, UK). The column  
949 was maintained at 30 °C and samples were eluted with a linear gradient (20 mM ammonium  
950 carbonate in water, A and acetonitrile, B) over 46 min at a flow rate of 0.3 mL/min as follows 0 min  
951 20% A, 30 min 80% A, 31 min 92% A, 36 min 92% A, 37 min 20% A, 46 min 20% A. The injection  
952 volume was 10  $\mu$ l and samples were maintained at 5 °C prior to injection.

953 Mass spectrometry data were processed using a combination of XCMS 3.2.0 and MZMatch.R  
954 1.0–4 (7). Briefly, data were converted from Thermo proprietary raw files to the open format mzXML.  
955 Unique signals were extracted using the centwave (8) algorithm and matched across biological  
956 replicates based on mass to charge ratio and retention time. These grouped peaks were then filtered  
957 based on relative standard deviation and combined into a single file. The combined sets were then  
958 filtered on signal to noise score, minimum intensity and minimum detections, leading to the  
959 exclusion of four bird samples (final n = 64). The final peak set was then gap-filled and converted to



960 text for use with IDEOM v18 (9). IDEOM contained peak data from 5483 compounds. From this  
961 dataset, we removed all compounds that IDEOM defined having a confidence lower than 4 (out of  
962 10). The majority of these were fragments that did not match to any known standard mass and  
963 retention time. Moreover, some metabolites were present twice as two different polarities, in which  
964 case only the polarity returning the highest signal was maintained, while the other was removed.  
965 Last, metabolites with 0 abundance in more than 10 % of the individuals were also removed. The  
966 final dataset contained 755 metabolites.

967

### 968 *Statistical analysis*

969 All statistical analyses were conducted in R, version 3.63 (10). In all models we included treatment as  
970 log-transformed light intensity (adding a constant = 1 to avoid zero returns).

971 To analyze locomotor activity data (i.e. perch-hopping), we first divided the time series of  
972 activity into a first phase, before all birds had stabilized their activity timing (defining the day of  
973 stabilization as the first day when the mean onset did not differ for more than 1 SEM to the previous  
974 and following day), and a stabilized phase thereafter. We first estimated the free-running period of  
975 birds during the first 10 days, by calculating the circadian period length using the Lomb-Scargle  
976 periodogram analysis implemented in the software Chronoshop (credits to Kamiel Spoelstra). We  
977 tested for differences in circadian period length between groups using a Gaussian LM with treatment  
978 as explanatory variable.

979 Second, using only the stabilized activity data after day 10, we ran a generalized additive  
980 mixed model (GAMM) to test for variation in the proportion of time spent active every hour. Bird ID  
981 was included as random factor. We included hour of day, in interaction with treatment, as smoothed  
982 terms. The GAMM was run using the function `gamm` in the package *mgcv* (11).

983 Third, we tested for variation in onset time, offset time, nocturnal activity and total daily  
984 activity using separate linear mixed models (LMMs) with ID as random effect, and treatment, day of

985 the experiment and their interaction, as well as the quadratic effect of day, as explanatory variables.

986 LMMs were run using the function `lmer` in the package *lme* (12).

987 To examine variation in relative transcript levels, we ran linear models (LMs) including ALAN  
988 treatment, sampling time (two-level factor, day and night), and their interaction as explanatory  
989 variables, and mRNA expression levels of the different genes in the different tissues as response  
990 variables. We used linear models also to test for individual-level relationships between mRNA levels  
991 of the same gene in different tissues, or for the relationship between mRNA levels of different genes  
992 within the same tissue. Moreover, we also used linear models to relate midnight hypothalamic  
993 mRNA levels of BMAL1 (explanatory variable) to the mean time of activity onset and offset of each  
994 bird. All linear models were run using the function `lm` in the library *stats* in R.

995 To test for variation in the levels of the individual metabolites identified by the LC-MS, we  
996 used all data, including the replicated mid-day samples (total  $n = 64$ ). Data from the subset of birds  
997 sampled both, two days before the culling and during the culling ( $n = 12$ ; Table S3) were highly  
998 correlated ( $r=0.92$  and  $p<0.001$ , Fig. S8). We ran independent LMMs for each metabolite, with  
999 metabolite levels as response variable (normalized), and treatment, time of day and their interaction  
1000 as explanatory variables. ID was always included as random factor. We corrected the p-values of all  
1001 these models by the false discovery rate test. Moreover, we ran two principal component analyses  
1002 using the function `prcomp` in the library *stats* in R. For these, we used only the 73 metabolites found  
1003 to be significantly affected by the treatment\*time interaction. The two PCAs were run on the  
1004 individual samples collected at mid-day or midnight, respectively. We then used the first two  
1005 principal components (PC1 and PC2) of the midnight based PCA as explanatory variables in two linear  
1006 models with onset and offset of activity as response variables, respectively.

1007

1008

1009

1010

## 1011 Supplementary references

- 1012 1. D. Dominoni, *et al.*, Dose-response effects of light at night on the reproductive physiology of  
1013 great tits (*Parus major*): Integrating morphological analyses with candidate gene expression. *J.*  
1014 *Exp. Zool. Part A Ecol. Integr. Physiol.* **2018**, 1–15 (2018).
- 1015 2. M. de Jong, *et al.*, Dose-dependent responses of avian daily rhythms to artificial light at night.  
1016 *Physiol. Behav.* **155**, 172–179 (2016).
- 1017 3. V. N. Laine, *et al.*, Evolutionary signals of selection on cognition from the great tit genome and  
1018 methylome. *Nat. Commun.* **7**, 10474 (2016).
- 1019 4. M. Kearse, *et al.*, Geneious Basic: An integrated and extendable desktop software platform for  
1020 the organization and analysis of sequence data. *Bioinformatics* **28**, 1647–1649 (2012).
- 1021 5. J. Vandesompele, *et al.*, Accurate normalization of real-time quantitative RT-PCR data by  
1022 geometric averaging of multiple internal control genes. *Genome Biol.* **3**, research0034.1  
1023 (2002).
- 1024 6. F. Dijk, E. Kraal-Muller, W. Kamphuis, Ischemia-Induced Changes of AMPA-Type Glutamate  
1025 Receptor Subunit Expression Pattern in the Rat Retina: A Real-Time Quantitative PCR Study.  
1026 *Investig. Ophthalmol. Vis. Sci.* **45**, 330–341 (2004).
- 1027 7. R. A. Scheltema, A. Jankevics, R. C. Jansen, M. A. Swertz, R. Breitling, PeakML/mzMatch: A file  
1028 format, Java library, R library, and tool-chain for mass spectrometry data analysis. *Anal. Chem.*  
1029 **83**, 2786–2793 (2011).
- 1030 8. R. Tautenhahn, C. Bottcher, S. Neumann, Highly sensitive feature detection for high resolution  
1031 LC/MS. *BMC Bioinformatics* **9**, 1–16 (2008).
- 1032 9. D. J. Creek, A. Jankevics, K. E. V. Burgess, R. Breitling, M. P. Barrett, IDEOM: An Excel interface  
1033 for analysis of LC-MS-based metabolomics data. *Bioinformatics* **28**, 1048–1049 (2012).
- 1034 10. R Development Core Team, R: A language and environment for statistical computing. URL  
1035 <http://www.R-project.org> (2015).
- 1036 11. , CRAN - Package mgcv (December 9, 2020).
- 1037 12. D. Bates, M. Maechler, B. Bolker, S. Walker, lme4: Linear mixed-effects models using Eigen  
1038 and S4. *R Packag. version 1.1-12* (2013).
- 1039 13. B. Helm, M. E. Visser, Heritable circadian period length in a wild bird population. *Proc. R. Soc.*  
1040 *B Biol. Sci.* **277**, 3335–3342 (2010).

1041

1042

1043

1044

1045

1046

1047 **Supplementary figures**

1048

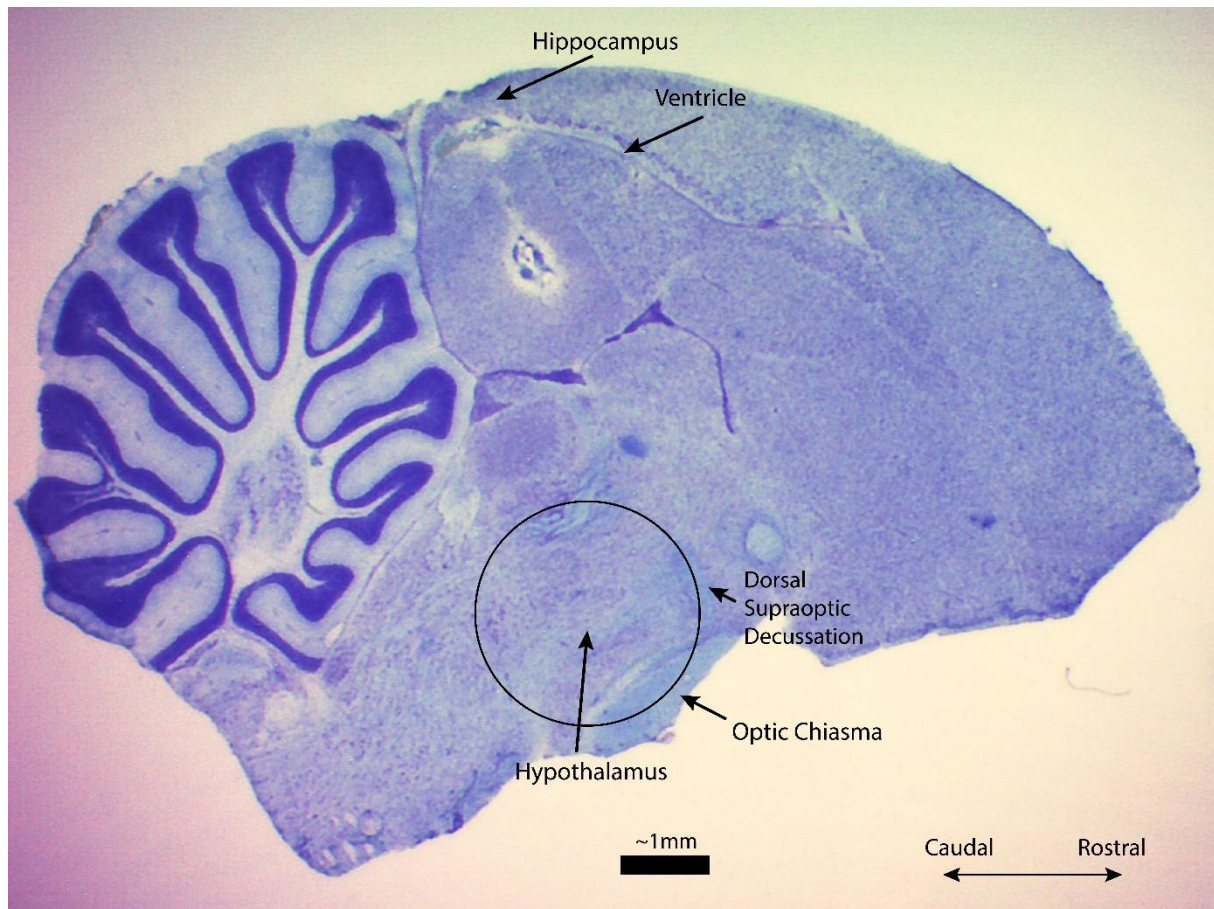

1049

1050 **Figure S1.** Sagittal section of a great tit brain sampled in the experiment. Highlighted are the two  
1051 areas used in the analyses: the hypothalamus, sampled via a 3 mm punch in the region just dorso-  
1052 caudal of the optic chiasm, caudal of the dorsal supraoptic decussation, and the hippocampus, the  
1053 central superior region of the section delimited by the below lateral ventricle.

1054

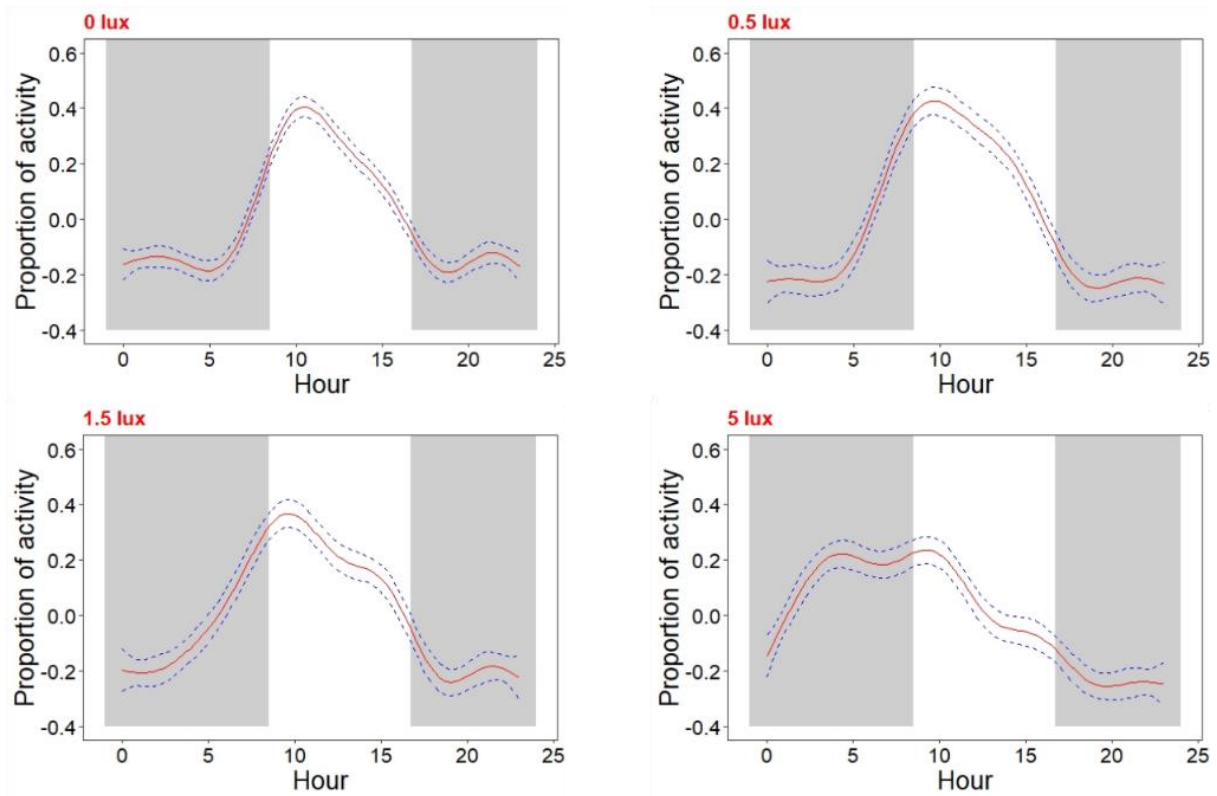

1055

1056 **Figure S2.** GAMM predictions for each light treatment for the proportion of active 2-min intervals per  
1057 hour. In each panel, red line depicts predicted mean and blue dashed lines depict 95 % confidence  
1058 intervals. Grey areas represent night hours, white areas represent daytime.

1059

1060

1061

1062

1063

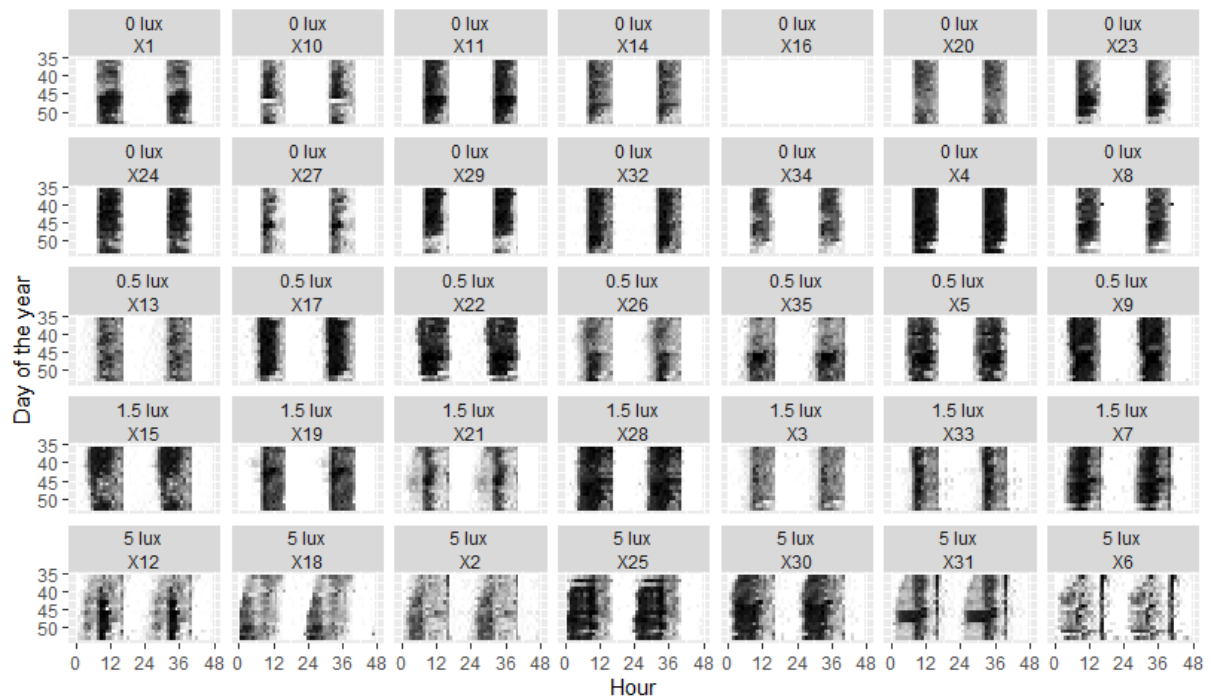

1064

1065 **Figure S3.** Actograms of all birds used in the experiment. The first two rows represent birds in the 0 lx  
1066 treatment, the third row birds in the 0.5 lux treatment, the fourth row those in the 1.5 lux treatment,  
1067 and the last row the birds in the 5 lux treatment. One bird (X16) died before the start of the  
1068 experiment. Within each plot, rows represent days since the start of the year, and columns the hours  
1069 of day. The intensity of black represents the amount of activity within each hour bin. Each actogram  
1070 is double plotted to better visualize free-running rhythms of activity.

1071

1072

1073

1074

1075

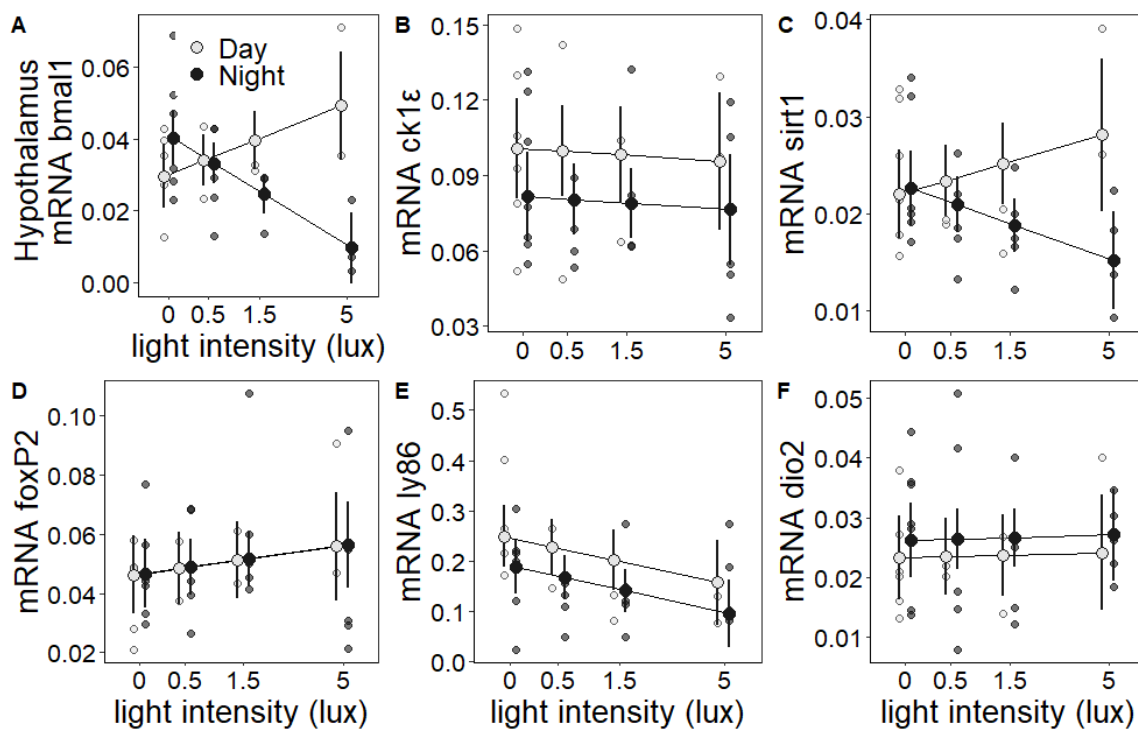

1076

1077

1078 **Figure S4.** Changes in hypothalamic gene expression in response to ALAN of different intensity  
1079 measured at mid-day vs. midnight. Large symbols  $\pm$  SEM connected by lines represent model  
1080 estimates, whereas small symbols depict raw data points (grey = mid-day, black = midnight).

1081

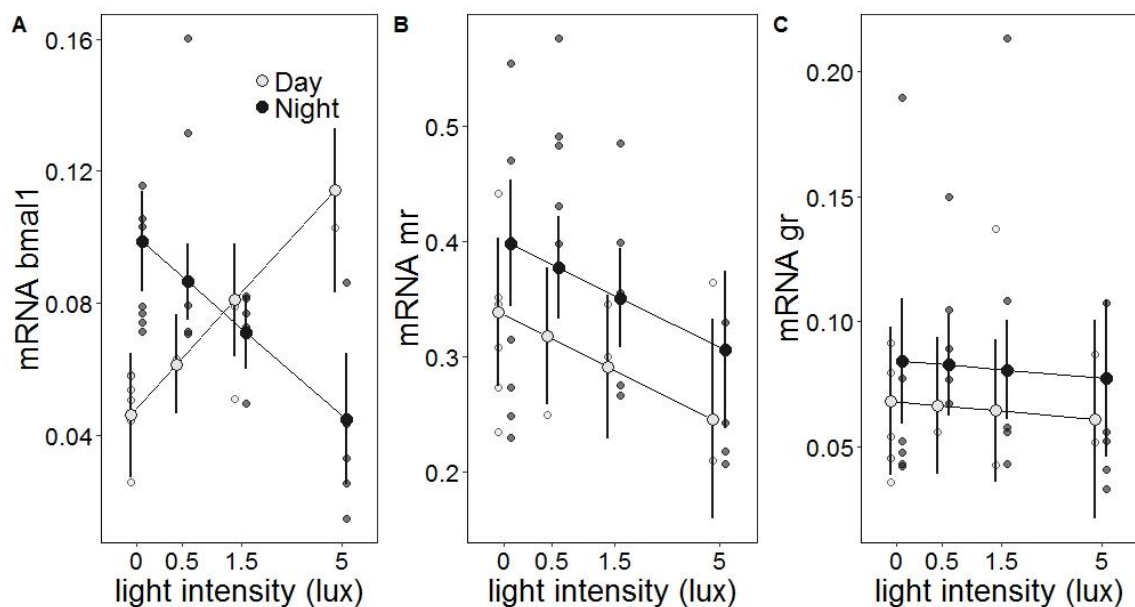

1082

1083 **Figure S5.** Changes in hippocampal gene expression in response to ALAN of different intensity. Large  
1084 symbols  $\pm$  SEM connected by lines represent model estimates, whereas small symbols depict raw  
1085 data points (grey = mid-day, black = midnight).

1086

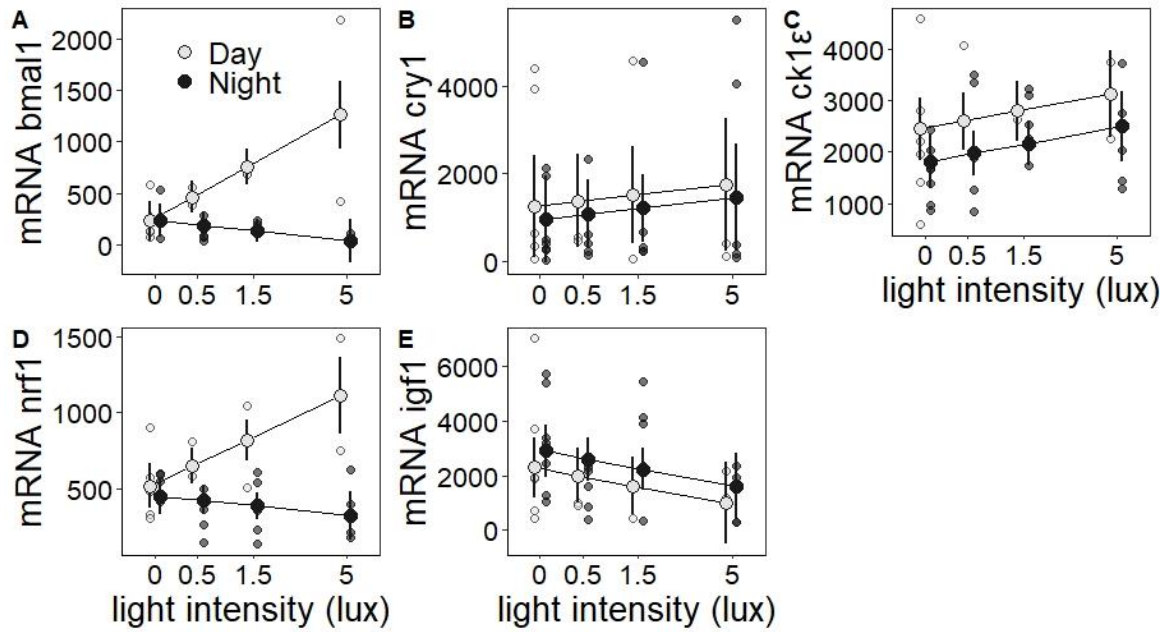

1087  
1088  
1089  
1090  
1091  
1092  
1093  
1094  
1095

**Figure S6.** Changes in liver gene expression in response to ALAN of different intensity. One outlier was detected for *CRY1* (panel B), however, its exclusion did not qualitatively modify the statistical results. Large symbols  $\pm$  SEM connected by lines represent model estimates, whereas small symbols depict raw data points (grey = mid-day, black = midnight).

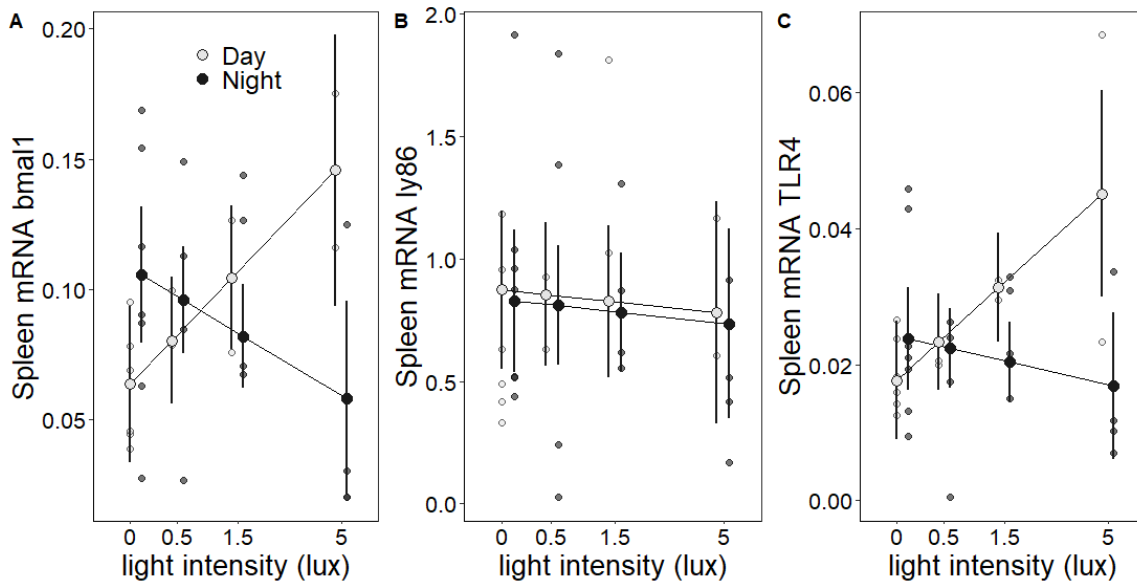

1096  
1097  
1098  
1099  
1100  
1101  
1102  
1103

**Figure S7.** Changes in spleen gene expression in response to ALAN of different intensity. Large symbols  $\pm$  SEM connected by lines represent model estimates, whereas small symbols depict raw data points (grey = mid-day, black = midnight).



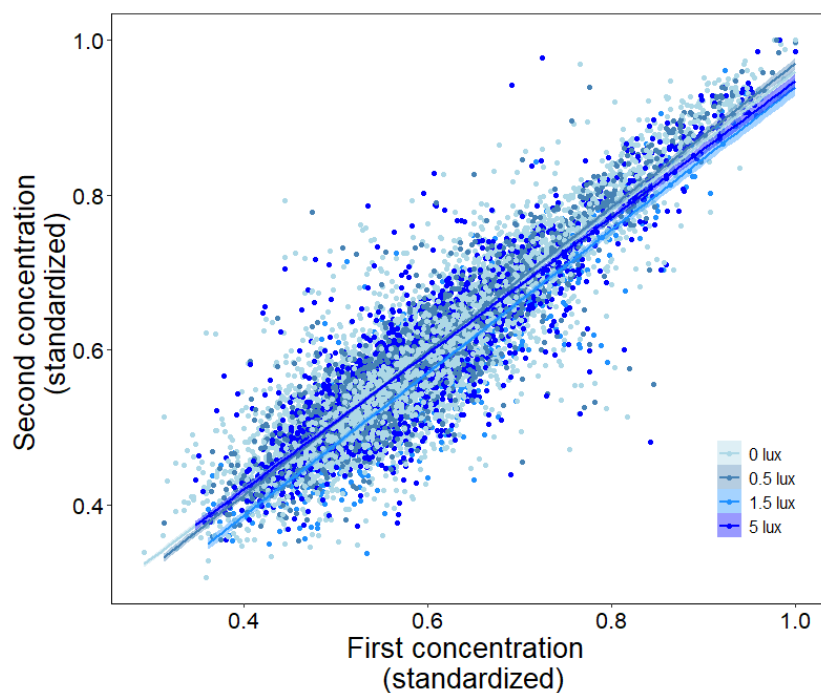

1104

1105

1106 **Figure S8.** Within-individual correlations between standardised metabolite concentration considering  
1107 the whole metabolome (892 metabolites). Each point represents one metabolite measured in one  
1108 individual two days apart, before the final culling (x-axis) and at the time of culling (y-axis).

1109

## Supplementary tables

**Table S1.** Overview of genes analyzed. Indicated are genes with their full names, a functional note, the tissues where they were measured (Hth=hypothalamus, Hip=hippocampus, Liv=liver, Spl=spleen), and forward and reverse primers for RT-qPCR. Superscripts indicate functional groups. <sup>a</sup> clock genes and modulators; <sup>b</sup> seasonal regulators; <sup>c</sup> metabolic genes; <sup>d</sup> immune genes; <sup>e</sup> endocrine genes; <sup>f</sup> reference genes.

| Gene                                          | Full name                                            | Functional note                                                              | Hth | Hip | Liv | Spl | Forward                   | Reverse                       |
|-----------------------------------------------|------------------------------------------------------|------------------------------------------------------------------------------|-----|-----|-----|-----|---------------------------|-------------------------------|
| <sup>a</sup> <i>bmal1</i><br>( <i>arntl</i> ) | Brain and Muscle ARNT-Like1                          | core clock gene                                                              | yes | yes | yes | yes | cgcttcgtggtgctacaaac      | ccatctgctgcctgagaat           |
| <sup>a</sup> <i>cry1</i>                      | Cryptochrome Circadian Regulator 1                   | core clock gene                                                              |     |     | yes |     | tcaccatttagcccggcatgc     | gaaagaaggaactacaggacagccacatc |
| <sup>a</sup> <i>ck1ε</i><br>( <i>CSNK1E</i> ) | Casein kinase I isoform epsilon                      | posttranslational modulator of clock proteins (PER)                          | yes |     | yes |     | cattaagtgggtggagcag       | aaatttcgggaacagaagt           |
| <sup>b</sup> <i>dio2</i>                      | Type II iodothyronine deiodinase                     | converts thyroxine (T4) to bioactive thyroid hormone triiodothyronine (T3)   | yes |     |     |     | tccacacttgccaccaacat      | caaaactgggaggagaagccc         |
| <sup>b</sup> <i>foxP2</i>                     | Forkhead box protein P2                              | transcription factor involved in vocal learning and plasticity               | yes |     |     |     | aaaggagcagatggacagt       | agctgtggtgatgttttc            |
| <sup>c</sup> <i>sirt1</i>                     | Sirtuin 1                                            | enzyme deacetylating transcription factors (clock-, stress-, ageing- linked) | yes |     |     |     | gtcacaagttcatcgcttg       | atcctttggattcctgcaac          |
| <sup>c</sup> <i>nrf1</i>                      | Nuclear Respiratory Factor 1                         | key nuclear transcription factor of involved in mitochondrial activity       |     |     | yes |     | gggccacgctggatgagtaca     | gccagcgccgattccagat           |
| <sup>d</sup> <i>ly86</i><br>( <i>MD1</i> )    | Lymphocyte antigen 86                                | regulates T cell activation and cytokine production                          | yes |     |     | yes | gaccattgtgctgatattgcaacc  | agcttatcatgaccggccca          |
| <sup>d</sup> <i>tlr4</i>                      | Toll-like receptor 4                                 | Pattern recognition factor, innate immune system activation                  |     |     |     | yes | cacctccacacctggatatt      | tcgaaggtcaggagcttattg         |
| <sup>e</sup> <i>nr3c1</i><br>( <i>gr</i> )    | Nuclear receptor subfamily 3, group C, member 1      | glucocorticoid receptor                                                      |     | yes |     |     | attggctccgctgggaacg       | aggcctcgtcagagcacacca         |
| <sup>e</sup> <i>nr3c2</i><br>( <i>mr</i> )    | Nuclear receptor subfamily 3, group C, member 2      | mineralocorticoid receptor                                                   |     | yes |     |     | tgtgtctgtcatcgtttgccttgag | cggacgaactcaggctgatct         |
| <sup>e</sup> <i>igf1</i>                      | Insulin-like growth factor 1                         | hormone linked to mitochondrial biogenesis, respiration and ageing           |     |     | yes |     | ttgctgtggtccagaacac       | cacaactctggaagcagcattcatcc    |
| <sup>f</sup> <i>RPL13</i>                     | ribosomal protein L13                                | component of ribosome                                                        | yes | yes | yes |     | tactcctcagcctctgcac       | acaagaagttgcccggact           |
| <sup>f</sup> <i>RPL19</i>                     | ribosomal protein L19                                | component of ribosome                                                        | yes |     |     | yes | ctgggcaagaagaagggtg       | tcagccatccttgatcagc           |
| <sup>f</sup> <i>SDHA</i>                      | Succinate Dehydrogenase Complex Flavoprotein Subunit | mitochondrial respiratory chain                                              |     | yes | yes | yes | gggcaataactccacggcat      | ttgatggcaggtctctacga          |
| <sup>f</sup> <i>PMM1</i>                      | Phosphomannomutase                                   | glycosylation                                                                |     |     | yes |     | cacccagaggagcgaatcga      | tcgagcacattaggcagtagcg        |
| <sup>f</sup> <i>TBP</i>                       | TATA-binding protein                                 | general transcription factor                                                 |     |     | yes |     | aaaactattgcactctgtgccga   | gaatatcagtcagtggtacgtgttctct  |

1 **Table S2.** Sample sizes for treatment and time of sampling used in the gene expression analyses.

| Treatment | Day | Night |
|-----------|-----|-------|
| 0 lux     | 6   | 7     |
| 0.5 lux   | 2   | 5     |
| 1.5 lux   | 2   | 5     |
| 5 lux     | 2   | 5     |

2

3

4

5 **Table S3.** Sample sizes for treatment and time of sampling used for the metabolomics analysis.  
6 All birds were sampled at mid-day two days before the final culling, on Feb 20<sup>th</sup>. Birds were then  
7 re-sampled at mid-day or midnight during the culling. Metabolomics data from 64 individual bird  
8 samples (4 samples were excluded due to low signal in the LC-MS data) were used in our  
9 analyses. For a subset of birds (n = 12, the sum of all birds sampled at mid-day during culling),  
10 we have two mid-day samples which we used to examine within-individual correlation of  
11 metabolite levels (see Fig. S8 for these results).

| Treatment | Pre-culling samples<br>(Feb 20 <sup>th</sup> 2014) | Culling samples<br>(Feb 22 <sup>nd</sup> & 23 <sup>rd</sup> 2014) |       |
|-----------|----------------------------------------------------|-------------------------------------------------------------------|-------|
|           | Day                                                | Day                                                               | Night |
| 0 lux     | 13                                                 | 6                                                                 | 6     |
| 0.5 lux   | 7                                                  | 2                                                                 | 5     |
| 1.5 lux   | 6                                                  | 2                                                                 | 3     |
| 5 lux     | 7                                                  | 2                                                                 | 5     |

12

13

14

15

16

17

18

19

20

21 **Table S4.** Results of generalized additive mixed model (GAMM) testing for variation in the  
 22 proportion of 2-min intervals spent active per hour of day, depending on night light intensity.  
 23 Treatment was included as linear predictor. Hour of day was included as smoothed predictor,  
 24 and we included four smoothed terms referring to the four treatments. Plots for these  
 25 smoothed terms can be seen in Fig. 2 of the main text.

26

| <b>Parametric coefficients</b>       |                 |                   |                |                |
|--------------------------------------|-----------------|-------------------|----------------|----------------|
| <i>Predictor</i>                     | <i>Estimate</i> | <i>Std. Error</i> | <i>t value</i> | <i>p value</i> |
| Intercept                            | 0.18            | 0.01              | 14.51          | < 0.001        |
| Treatment                            | 0.02            | 0.01              | 3.18           | <b>0.001</b>   |
| <b>Significance of smooth terms:</b> |                 |                   |                |                |
| <i>Predictor</i>                     | <i>F</i>        | <i>p value</i>    |                |                |
| s(Hour of Day)*Treatment 0 lux       | 177.38          | <b>&lt;0.001</b>  |                |                |
| s(Hour of Day)*Treatment 0.5 lux     | 141.02          | <b>&lt;0.001</b>  |                |                |
| s(Hour of Day)*Treatment 1.5 lux     | 95.86           | <b>&lt;0.001</b>  |                |                |
| s(Hour of Day)*Treatment 5 lux       | 81.13           | <b>&lt;0.001</b>  |                |                |

27

28

29 **Table S5.** Results of Gaussian linear mixed models testing for variation in activity levels  
 30 depending on night light intensity, day of the experiment and their interaction. The day of the  
 31 experiment was also coded as a quadratic term for testing non-linear changes in activity traits  
 32 over the course of the experiment after the initial exposure to ALAN. The error structure used in  
 33 each model is specified in brackets.

34

| <b>Onset of activity</b>   |                 |                  |                |                  |  |
|----------------------------|-----------------|------------------|----------------|------------------|--|
| <i>predictor</i>           | <i>estimate</i> | <i>std.error</i> | <i>t value</i> | <i>p value</i>   |  |
| Intercept                  | -134.7          | 10.4             | -12.92         | <0.001           |  |
| Day                        | -23.7           | 9.8              | -2.41          | <b>0.017</b>     |  |
| Treatment                  | -124.9          | 10.4             | -11.96         | <b>&lt;0.001</b> |  |
| Day <sup>2</sup>           | 19              | 9.3              | 2.04           | <b>0.042</b>     |  |
| Treatment*Day              | -34.6           | 9.9              | -3.52          | <b>&lt;0.001</b> |  |
| Treatment*Day <sup>2</sup> | 19.4            | 9.3              | 2.08           | <b>0.038</b>     |  |
| <b>Offset of activity</b>  |                 |                  |                |                  |  |
| <i>predictor</i>           | <i>estimate</i> | <i>std.error</i> | <i>t value</i> | <i>p value</i>   |  |
| Intercept                  | 4.2             | 7.5              | 0.56           | 0.578            |  |
| Day                        | -8              | 7.6              | -1.06          | 0.289            |  |
| Treatment                  | 8.4             | 7.5              | 1.12           | 0.271            |  |
| Day <sup>2</sup>           | 4.5             | 7.6              | 0.59           | 0.556            |  |
| Treatment*Day              | -10.9           | 1.8              | -6.15          | <b>&lt;0.001</b> |  |
| <b>Nocturnal activity</b>  |                 |                  |                |                  |  |
| <i>predictor</i>           | <i>estimate</i> | <i>std.error</i> | <i>t value</i> | <i>p value</i>   |  |
| Intercept                  | -1.7            | 0.1              | -12.1          | <b>&lt;0.001</b> |  |
| Day                        | 0.1             | 0.1              | 0.51           | <b>&lt;0.001</b> |  |
| Treatment                  | 1.1             | 0.1              | 8.83           | <b>&lt;0.001</b> |  |
| <b>Total 24h activity</b>  |                 |                  |                |                  |  |
| <i>predictor</i>           | <i>estimate</i> | <i>std.error</i> | <i>t value</i> | <i>p value</i>   |  |
| Intercept                  | 377.7           | 17.3             | 21.78          | <b>&lt;0.001</b> |  |
| Day                        | 41.9            | 10.8             | 3.87           | <b>&lt;0.001</b> |  |
| Treatment                  | 32.8            | 17.4             | 1.89           | 0.068            |  |
| Day <sup>2</sup>           | -30.9           | 10.8             | -2.86          | <b>0.004</b>     |  |
| Treatment*Day              | 14.6            | 2.5              | 5.77           | <b>&lt;0.001</b> |  |

35

36

37

38 **Table S6.** Estimated period length (tau) of Great tits exposed to ALAN until activity patterns  
 39 stabilized. Shown are estimated means from a Gaussian LM and outcomes of Tukey post-hoc  
 40 testing for differences in tau through pair-wise contrasts of treatment groups. Tau was  
 41 estimated via Lomb-Scargle periodogram analysis implemented in the software Chronoshop  
 42 (courtesy of Kamiel Spoelstra), using only the first 10 days of activity data. During this phase  
 43 shifting interval, period lengths in the 5 lx group were similar to the reported free-running  
 44 period length of this species (13).

45

| <b>Estimated means</b> |                                    |                      |                     |
|------------------------|------------------------------------|----------------------|---------------------|
| <i>treatment</i>       | <i>estimated mean (mins)</i>       | <i>lower 95 % CI</i> | <i>upper 95% CI</i> |
| 0 lux                  | 23.95                              | 23.88                | 24.01               |
| 0.5 lux                | 23.89                              | 23.80                | 23.97               |
| 1.5 lux                | 23.85                              | 23.76                | 23.94               |
| 5 lux                  | 23.59                              | 23.50                | 23.68               |
| <b>Post-hoc test</b>   |                                    |                      |                     |
| <i>contrast</i>        | <i>estimated difference (mins)</i> | <i>std.error</i>     | <i>P value</i>      |
| 0 lux - 0.5 lux        | 3.8                                | 3.2                  | 0.646               |
| 0 lux - 1.5 lux        | 6.1                                | 3.2                  | 0.254               |
| 0 lux - 5 lux          | 21.5                               | 3.2                  | <b>&lt;0.001</b>    |
| 0.5 lux - 1.5 lux      | 2.3                                | 3.7                  | 0.924               |
| 0.5 lux - 5 lux        | 17.7                               | 3.7                  | <b>&lt;0.001</b>    |
| 1.5 lux - 5 lux        | 15.4                               | 3.7                  | <b>0.001</b>        |

46

47

48

49

50

51

52

53

54

55

56

57

58 **Table S7.** Results of linear models (Gaussian error structure) testing for variation in mRNA levels  
 59 of six different genes in the hypothalamus. Estimates for the predictor sampling time refer to  
 60 midnight values, while mid-day values are the reference level.

| <b>HYPOTHALAMUS GENE EXPRESSION</b> |                 |                  |                |                  |
|-------------------------------------|-----------------|------------------|----------------|------------------|
| <b>bmal1</b>                        |                 |                  |                |                  |
| <i>predictor</i>                    | <i>estimate</i> | <i>std.error</i> | <i>t value</i> | <i>p value</i>   |
| Intercept                           | 0.03            | 0.004            | 6.8            | <0.001           |
| Treatment                           | 0.011           | 0.005            | 2.1            | <b>0.044</b>     |
| Time                                | 0.01            | 0.006            | 1.84           | 0.076            |
| Treatment*Time                      | -0.028          | 0.006            | -4.37          | <b>&lt;0.001</b> |
| <b>ck1ε</b>                         |                 |                  |                |                  |
| <i>predictor</i>                    | <i>estimate</i> | <i>std.error</i> | <i>t value</i> | <i>p value</i>   |
| Intercept                           | 0.101           | 0.01             | 10.32          | <b>&lt;0.001</b> |
| Treatment                           | -0.003          | 0.008            | -0.38          | 0.709            |
| Time                                | -0.019          | 0.011            | -1.72          | 0.095            |
| <b>sirt1</b>                        |                 |                  |                |                  |
| <i>predictor</i>                    | <i>estimate</i> | <i>std.error</i> | <i>t value</i> | <i>p value</i>   |
| Intercept                           | 0.022           | 0.002            | 9.83           | <0.001           |
| Treatment                           | 0.003           | 0.003            | 1.26           | 0.216            |
| Time                                | 0.001           | 0.003            | 0.22           | 0.831            |
| Treatment*Time                      | -0.008          | 0.003            | -2.29          | <b>0.029</b>     |
| <b>dio2</b>                         |                 |                  |                |                  |
| <i>predictor</i>                    | <i>estimate</i> | <i>std.error</i> | <i>t value</i> | <i>p value</i>   |
| Intercept                           | 0.023           | 0.003            | 6.75           | <0.001           |
| Treatment                           | 0               | 0.003            | 0.17           | 0.866            |
| Time                                | 0.003           | 0.004            | 0.76           | 0.455            |
| <b>foxp2</b>                        |                 |                  |                |                  |
| <i>predictor</i>                    | <i>estimate</i> | <i>std.error</i> | <i>t value</i> | <i>p value</i>   |
| Intercept                           | 0.046           | 0.007            | 7.07           | <0.001           |
| Treatment                           | 0.005           | 0.005            | 1.02           | 0.317            |
| Time                                | 0               | 0.007            | 0.05           | 0.958            |
| <b>ly86</b>                         |                 |                  |                |                  |
| <i>predictor</i>                    | <i>estimate</i> | <i>std.error</i> | <i>t value</i> | <i>p value</i>   |
| Intercept                           | 0.249           | 0.03             | 8.29           | <0.001           |
| Treatment                           | -0.051          | 0.024            | -2.12          | <b>0.042</b>     |
| Time                                | -0.061          | 0.034            | -1.79          | 0.083            |

61 **Table S8.** Results of linear models (Gaussian error structure) testing for variation in mRNA levels  
 62 of three different genes in the hippocampus. Estimates for the predictor sampling time refer to  
 63 midnight values, while mid-day values are the reference level.

64

| <b>HIPPOCAMPUS GENE EXPRESSION</b> |                 |                  |                |                  |
|------------------------------------|-----------------|------------------|----------------|------------------|
| <b>bmal1</b>                       |                 |                  |                |                  |
| <i>predictor</i>                   | <i>estimate</i> | <i>std.error</i> | <i>t value</i> | <i>p value</i>   |
| Intercept                          | 0.046           | 0.009            | 5.03           | <0.001           |
| Treatment                          | 0.038           | 0.011            | 3.59           | <b>0.001</b>     |
| Time                               | 0.053           | 0.012            | 4.45           | <b>&lt;0.001</b> |
| Treatment*Time                     | -0.068          | 0.013            | -5.22          | <b>&lt;0.001</b> |
| <b>mineralocorticoid receptor</b>  |                 |                  |                |                  |
| <i>predictor</i>                   | <i>estimate</i> | <i>std.error</i> | <i>t value</i> | <i>p value</i>   |
| Intercept                          | 0.338           | 0.032            | 10.69          | <0.001           |
| Treatment                          | -0.052          | 0.025            | -2.11          | <b>0.044</b>     |
| Time                               | 0.06            | 0.036            | 1.67           | 0.105            |
| <b>glucocorticoid receptor</b>     |                 |                  |                |                  |
| <i>predictor</i>                   | <i>estimate</i> | <i>std.error</i> | <i>t value</i> | <i>p value</i>   |
| Intercept                          | 0.068           | 0.015            | 4.67           | <0.001           |
| Treatment                          | -0.004          | 0.011            | -0.35          | 0.728            |
| Time                               | 0.016           | 0.016            | 0.99           | 0.329            |

65

66

67

68

69

70

71

72

73

74

75

76



77 **Table S9.** Relationships between *BMAL1* mRNA levels in different tissues. Shown are results of  
 78 Gaussian linear models testing for the relationship between mRNA levels (all log-transformed) in  
 79 two tissues per model, while controlling for sampling time and treatment, which were included  
 80 as covariates in all models.

81

| <b><i>bmal1</i> hippocampus ~ <i>bmal1</i> hypothalamus</b> |                 |                   |                |                |
|-------------------------------------------------------------|-----------------|-------------------|----------------|----------------|
| <i>Predictor</i>                                            | <i>Estimate</i> | <i>Std. Error</i> | <i>t value</i> | <i>p value</i> |
| Intercept                                                   | -0.44           | 0.30              | -1.50          | 0.145          |
| <i>bmal1</i> hypothalamus                                   | 0.71            | 0.09              | 8.02           | < <b>0.001</b> |
| Time                                                        | 0.40            | 0.11              | 3.72           | 0.001          |
| Treatment                                                   | 0.04            | 0.03              | 1.44           | 0.160          |
| <b><i>bmal1</i> liver ~ <i>bmal1</i> hypothalamus</b>       |                 |                   |                |                |
| <i>Predictor</i>                                            | <i>Estimate</i> | <i>Std. Error</i> | <i>t value</i> | <i>p value</i> |
| Intercept                                                   | 9.62            | 0.77              | 12.57          | < 0.001        |
| <i>bmal1</i> hypothalamus                                   | 1.11            | 0.23              | 4.89           | < <b>0.001</b> |
| Time                                                        | -0.80           | 0.27              | -2.97          | 0.006          |
| Treatment                                                   | 0.04            | 0.08              | 0.58           | 0.567          |
| <b><i>bmal1</i> spleen ~ <i>bmal1</i> hypothalamus</b>      |                 |                   |                |                |
| <i>Predictor</i>                                            | <i>Estimate</i> | <i>Std. Error</i> | <i>t value</i> | <i>p value</i> |
| Intercept                                                   | -2.17           | 0.43              | -5.10          | < 0.001        |
| <i>bmal1</i> hypothalamus                                   | 0.43            | 0.16              | 2.72           | <b>0.011</b>   |
| Time                                                        | -0.28           | 0.20              | -1.41          | 0.170          |
| Treatment                                                   | -0.13           | 0.05              | -2.46          | 0.021          |
| <b><i>bmal1</i> spleen ~ <i>bmal1</i> liver</b>             |                 |                   |                |                |
| <i>Predictor</i>                                            | <i>Estimate</i> | <i>Std. Error</i> | <i>t value</i> | <i>p value</i> |
| Intercept                                                   | -4.71           | 0.65              | -7.30          | < 0.001        |
| <i>bmal1</i> liver                                          | 0.37            | 0.10              | 3.59           | <b>0.001</b>   |
| Time                                                        | 0.32            | 0.23              | 1.42           | 0.166          |
| Treatment                                                   | 0.00            | 0.05              | 0.02           | 0.987          |

82

83

84

85 **Table S10.** Results of linear models (Gaussian error structure) testing for variation in mRNA  
 86 levels of four different genes in the liver. Estimates for the predictor sampling time refer to  
 87 midnight values, while mid-day values are the reference level.

88

| <b>LIVER GENE EXPRESSION</b> |                 |                  |                |                  |
|------------------------------|-----------------|------------------|----------------|------------------|
| <b>bmal1</b>                 |                 |                  |                |                  |
| <i>predictor</i>             | <i>estimate</i> | <i>std.error</i> | <i>t value</i> | <i>p value</i>   |
| Intercept                    | 228.703         | 94.065           | 2.43           | 0.021            |
| Treatment                    | 576.357         | 112.237          | 5.14           | <b>&lt;0.001</b> |
| Time                         | 4.893           | 122.818          | 0.04           | 0.968            |
| Treatment*Time               | -684.509        | 138.231          | -4.95          | <b>&lt;0.001</b> |
| <b>ck1ε</b>                  |                 |                  |                |                  |
| <i>predictor</i>             | <i>estimate</i> | <i>std.error</i> | <i>t value</i> | <i>p value</i>   |
| Intercept                    | 2446.672        | 300.406          | 8.14           | <0.001           |
| Treatment                    | 376.241         | 242.042          | 1.55           | 0.131            |
| Time                         | -625.039        | 342.306          | -1.83          | 0.078            |
| <b>nrf1</b>                  |                 |                  |                |                  |
| <i>predictor</i>             | <i>estimate</i> | <i>std.error</i> | <i>t value</i> | <i>p value</i>   |
| Intercept                    | 516.546         | 71.402           | 7.23           | <0.001           |
| Treatment                    | 330.961         | 85.196           | 3.88           | <b>0.001</b>     |
| Time                         | -65.376         | 93.228           | -0.7           | 0.489            |
| Treatment*Time               | -402.217        | 104.928          | -3.83          | <b>0.001</b>     |
| <b>igf1</b>                  |                 |                  |                |                  |
| <i>predictor</i>             | <i>estimate</i> | <i>std.error</i> | <i>t value</i> | <i>p value</i>   |
| Intercept                    | 2289.529        | 541.793          | 4.23           | <0.001           |
| Treatment                    | -720.868        | 436.532          | -1.65          | 0.109            |
| Time                         | 604.69          | 617.361          | 0.98           | 0.335            |

89

90

91

92

93

94

95

96 **Table S11.** Results of linear models (Gaussian error structure) testing for variation in mRNA  
 97 levels of three different genes in the spleen. Estimates for the predictor sampling time refer to  
 98 midnight values, while mid-day values are the reference level.

99

| <b>SPLEEN GENE EXPRESSION</b> |                 |                  |                |                |
|-------------------------------|-----------------|------------------|----------------|----------------|
| <b>bmal1</b>                  |                 |                  |                |                |
| <i>predictor</i>              | <i>estimate</i> | <i>std.error</i> | <i>t value</i> | <i>p value</i> |
| Intercept                     | 0.063           | 0.015            | 4.3            | 0              |
| Treatment                     | 0.046           | 0.018            | 2.61           | <b>0.015</b>   |
| Time                          | 0.043           | 0.019            | 2.19           | <b>0.037</b>   |
| Treatment*Time                | -0.072          | 0.022            | -3.25          | <b>0.003</b>   |
| <b>ly86</b>                   |                 |                  |                |                |
| <i>predictor</i>              | <i>estimate</i> | <i>std.error</i> | <i>t value</i> | <i>p value</i> |
| Intercept                     | 0.873           | 0.158            | 5.52           | 0              |
| Treatment                     | -0.049          | 0.132            | -0.37          | 0.711          |
| Time                          | -0.045          | 0.183            | -0.25          | 0.806          |
| <b>tlr4</b>                   |                 |                  |                |                |
| <i>predictor</i>              | <i>estimate</i> | <i>std.error</i> | <i>t value</i> | <i>p value</i> |
| Intercept                     | 0.018           | 0.004            | 4.09           | 0              |
| Treatment                     | 0.015           | 0.005            | 2.98           | <b>0.006</b>   |
| Time                          | 0.006           | 0.006            | 1.12           | 0.272          |
| Treatment*Time                | -0.019          | 0.006            | -2.97          | <b>0.006</b>   |

100

101

102

103

104

105

106

107

108

109

110 **Table S12.** List of 29 metabolites significantly affected by the linear effect of treatment, as  
 111 tested via individuals LMMs run on all 755 identified metabolites. P-values were corrected using  
 112 a false discovery rate of 0.05.

| metabolite                                                          | F value | p value | p (fdr) |
|---------------------------------------------------------------------|---------|---------|---------|
| &beta;-ketophosphonate                                              | 12      | 0.002   | 0.013   |
| [FA] O-Palmitoyl-R-carnitine                                        | 7.7     | 0.007   | 0.035   |
| [PC (20:0)] 1-eicosanoyl-sn-glycero-3-phosphocholine                | 11.6    | 0.002   | 0.012   |
| [PC acetyl(17:2)] 1-heptadecyl-2-acetyl-sn-glycero-3-phosphocholine | 10.4    | 0.003   | 0.017   |
| 1,2-dioctanoyl-1-amino-2,3-propanediol                              | 11      | 0.002   | 0.014   |
| 3-4-DihydroxyphenylglycolO-sulfate                                  | 7.4     | 0.009   | 0.039   |
| 4-Pyridoxate                                                        | 8.7     | 0.006   | 0.03    |
| Ala-Asp-Pro                                                         | 8.4     | 0.007   | 0.033   |
| Anandamide                                                          | 12.8    | 0.001   | 0.005   |
| D-Glucuronate                                                       | 12.8    | 0.001   | 0.008   |
| D-Ornithine                                                         | 7.4     | 0.008   | 0.038   |
| dimethylsulfonio-2-hydroxybutyrate                                  | 7.7     | 0.01    | 0.042   |
| gamma-L-Glutamylputrescine                                          | 8.7     | 0.004   | 0.024   |
| Glu-Arg                                                             | 9.4     | 0.003   | 0.018   |
| Glu-Thr                                                             | 7.7     | 0.007   | 0.034   |
| Glyceraldehyde                                                      | 7.1     | 0.01    | 0.042   |
| Hypotaurine                                                         | 11.7    | 0.002   | 0.011   |
| Imidazole-4-acetate                                                 | 10.9    | 0.002   | 0.01    |
| L-a-glutamyl-L-Lysine                                               | 9.6     | 0.003   | 0.017   |
| L-Aspartate                                                         | 7.3     | 0.009   | 0.04    |
| L-Cysteinyglycinedisulfide                                          | 6.8     | 0.009   | 0.041   |
| Leucyl-leucine                                                      | 6.9     | 0.011   | 0.046   |
| LysoPE(0:0/22:0)                                                    | 8.8     | 0.006   | 0.028   |
| Ne,Ne dimethyllysine                                                | 7.3     | 0.009   | 0.039   |
| Protoporphyrin                                                      | 7.1     | 0.01    | 0.042   |
| Stearoylcarnitine                                                   | 9.3     | 0.003   | 0.019   |
| Taxa-4(20),11(12)-dien-5alpha-yl acetate                            | 8.9     | 0.004   | 0.022   |
| Tetradecanoylcarnitine                                              | 12.2    | 0.001   | 0.01    |
| Xylitol                                                             | 6.9     | 0.011   | 0.046   |

113

114 **Table S13.** List of 73 metabolites significantly affected by the interaction of treatment and  
 115 sampling time, as tested via individuals LMMs run on all 755 identified metabolites. P-values were  
 116 corrected using a false discovery rate of 0.05.

| metabolite                                                             | F value | p value | p (fdr) |
|------------------------------------------------------------------------|---------|---------|---------|
| (S)-ATPA                                                               | 7.9     | 0.007   | 0.027   |
| [FA (12:3)] 3,6,8-dodecatrien-1-ol                                     | 4.5     | 0.039   | 0.047   |
| [FA (14:2)] 5,8-tetradecadienoic acid                                  | 4.5     | 0.04    | 0.047   |
| [FA (16:2)] 9,12-hexadecadienoic acid                                  | 5.4     | 0.025   | 0.044   |
| [FA (18:1)] 9Z-octadecenoic acid                                       | 6.2     | 0.017   | 0.041   |
| [FA (20:0)] 11Z-eicosenoic acid                                        | 9.8     | 0.003   | 0.026   |
| [FA (20:0)] eicosanoic acid                                            | 4.6     | 0.037   | 0.047   |
| [FA (23:0/2:0)] Tricosanedioic acid                                    | 8.1     | 0.007   | 0.027   |
| [FA methyl(18:0)] 11R,12S-methylene-octadecanoic acid                  | 5.8     | 0.021   | 0.042   |
| [FA methyl,oxo(5:0/2:0)] 2-methylene-4-oxo-pentanedioic acid           | 5       | 0.029   | 0.046   |
| [FA oxo(5:2/5:0/4:0)] (1S,2S)-3-oxo-2-pentyl-cyclopentanebutanoic acid | 4.8     | 0.034   | 0.047   |
| [FA oxo(5:2/5:0/6:0)] (1R,2R)-3-oxo-2-pentyl-cyclopentanehexanoic acid | 8.2     | 0.007   | 0.027   |
| [Fv (2:0)] Flavaprenin 7,4'-diglucoside                                | 10.4    | 0.002   | 0.024   |
| [PE (16:0)] 1-hexadecanoyl-sn-glycero-3-phosphoethanolamine            | 4.6     | 0.037   | 0.047   |
| [PE (17:1)] 1-(9Z-heptadecenoyl)-sn-glycero-3-phosphoethanolamine      | 4.2     | 0.044   | 0.047   |
| [SP] Sphinganine-1-phosphate                                           | 7.6     | 0.008   | 0.03    |
| 2-Aminomuconate                                                        | 9.1     | 0.005   | 0.027   |
| 2-Hydroxyethanesulfonate                                               | 5.4     | 0.024   | 0.043   |
| 2-monooleoylglycerol                                                   | 5.9     | 0.019   | 0.042   |
| 2-thiouridine                                                          | 6.6     | 0.012   | 0.038   |
| 2,7-Anhydro-alpha-N-acetylneuraminic acid                              | 6.6     | 0.013   | 0.039   |
| 3-4-DihydroxyphenylglycolO-sulfate                                     | 4.7     | 0.036   | 0.047   |
| 3-Aminopropanesulfonate                                                | 11.5    | 0.001   | 0.022   |
| 3-Dehydroxycarnitine                                                   | 6.5     | 0.015   | 0.041   |
| 3-Methylguanidine                                                      | 4.3     | 0.045   | 0.047   |
| 3-Oxododecanoic acid                                                   | 5.1     | 0.029   | 0.046   |
| 3-sulfopropanoate                                                      | 4.1     | 0.048   | 0.048   |
| 5-Amino-4-chloro-2-(2,3-dihydroxyphenyl)-3(2H)-pyridazinone            | 5.5     | 0.022   | 0.043   |
| 9-Decenoylcarnitine                                                    | 8.2     | 0.007   | 0.027   |
| Ala-Ser                                                                | 6.2     | 0.016   | 0.041   |
| D-Glucarate                                                            | 4.3     | 0.043   | 0.047   |
| D-Proline                                                              | 4.7     | 0.037   | 0.047   |
| Ethanolamine phosphate                                                 | 8       | 0.006   | 0.027   |
| Gabapentin                                                             | 5.7     | 0.021   | 0.042   |
| gamma-L-Glutamylputrescine                                             | 13      | 0.001   | 0.022   |
| Glu-Arg                                                                | 5.5     | 0.023   | 0.043   |
| Glu-Pro                                                                | 11.3    | 0.002   | 0.022   |
| Glu-Thr                                                                | 4.1     | 0.049   | 0.049   |

|                                           |      |       |       |
|-------------------------------------------|------|-------|-------|
| Glutathione disulfide                     | 4.1  | 0.047 | 0.048 |
| Glycylproline                             | 4.5  | 0.04  | 0.047 |
| Homoarginine                              | 4.6  | 0.038 | 0.047 |
| Homocysteinesulfinicacid                  | 4.7  | 0.034 | 0.047 |
| hydrogen iodide                           | 4.5  | 0.038 | 0.047 |
| Imidazole-4-acetate                       | 4.6  | 0.035 | 0.047 |
| L-a-glutamyl-L-Lysine                     | 6    | 0.017 | 0.041 |
| L-Arginine                                | 5.4  | 0.025 | 0.044 |
| L-Citrulline                              | 4.5  | 0.04  | 0.047 |
| L-Glutamate                               | 5.1  | 0.027 | 0.045 |
| L-Lysine                                  | 7    | 0.012 | 0.038 |
| L-Threonine                               | 5.7  | 0.019 | 0.042 |
| L-Tyrosine                                | 12.6 | 0.001 | 0.022 |
| Leu-Asn-His                               | 6.3  | 0.016 | 0.041 |
| Leu-Phe-Cys                               | 4.3  | 0.043 | 0.047 |
| Linoelaidylcarnitine                      | 4.1  | 0.047 | 0.048 |
| Linoleate                                 | 8.9  | 0.005 | 0.027 |
| LysoPC(22:4(7Z,10Z,13Z,16Z))              | 4.6  | 0.038 | 0.047 |
| LysoPC(22:5(4Z,7Z,10Z,13Z,16Z))           | 10.7 | 0.002 | 0.022 |
| LysoPE(0:0/22:5(4Z,7Z,10Z,13Z,16Z))       | 4.3  | 0.042 | 0.047 |
| N'-Phosphoguanidinoethyl methyl phosphate | 7.9  | 0.007 | 0.027 |
| N-Acetyl-D-fucosamine                     | 9.1  | 0.005 | 0.027 |
| N-Acetyl-L-aspartate                      | 6.2  | 0.015 | 0.041 |
| N-Acetylneuraminate                       | 7.1  | 0.01  | 0.034 |
| N6-Methyl-L-lysine                        | 4.6  | 0.038 | 0.047 |
| omega-Cyclohexylundecanoic acid           | 6.1  | 0.018 | 0.042 |
| Phenylacetic acid                         | 5.2  | 0.027 | 0.045 |
| Propanoyl phosphate                       | 4.2  | 0.044 | 0.047 |
| Quinalphos                                | 8    | 0.006 | 0.027 |
| Retronecine                               | 5.6  | 0.024 | 0.043 |
| S-Acetyldihydrolipoamide                  | 10.7 | 0.002 | 0.022 |
| Stachydrine                               | 10.2 | 0.003 | 0.026 |
| Sulfite                                   | 5.7  | 0.02  | 0.042 |
| Tetradecanoylcarnitine                    | 5.1  | 0.029 | 0.046 |
| Thr-Asp-Pro                               | 4.3  | 0.043 | 0.047 |

117

118
