1

2 **Artificial light at night leads to circadian disruption in a songbird:**

3 **integrated evidence from behavioural, genomic and metabolomic data**

4

5 Davide M. Dominoni<sup>1,2,\*</sup>, Maaïke de Jong<sup>2,3</sup>, Kees van Oers<sup>2</sup>, Peter O'Shaughnessy<sup>1</sup>, Gavin

6 Blackburn<sup>4</sup>, Els Atema<sup>2</sup>, Christa A. Mateman<sup>2</sup>, Pietro B. D'Amelio<sup>5,6,7</sup>, Lisa Trost<sup>5</sup>, Michelle

7 Bellingham<sup>1</sup>, Jessica Clark<sup>1</sup>, Marcel E. Visser<sup>2,8</sup>, Barbara Helm<sup>1,8</sup>

8

9 <sup>1</sup> Institute of Biodiversity, Animal Health and Comparative Medicine, University of Glasgow,

10 University Avenue, Glasgow, G12 8QQ UK

11 <sup>2</sup> Department of Animal Ecology, Netherlands Institute of Ecology (NIOO-KNAW), Wageningen,

12 The Netherlands

13 <sup>3</sup> Plant Ecology and Nature Conservation Group, Wageningen University & Research,

14 Wageningen, The Netherlands

15 <sup>4</sup> Glasgow Polyomics, Wolfson Wohl Cancer Research Centre, College of Medical, Veterinary and

16 Life Sciences, University of Glasgow, Glasgow G61 1BD, UK

17 <sup>5</sup> Department of Behavioural Neurobiology, Max Planck Institute for Ornithology, Seewiesen,

18 Germany

19 <sup>6</sup> FitzPatrick Institute of African Ornithology, University of Cape Town, Rondebosch 7701, South

20 Africa

21 <sup>7</sup> Centre d'Ecologie Fonctionnelle et Evolutive, University of Montpellier, CNRS, EPHE, IRD, Univ

22 Paul-Valéry Montpellier 3, Montpellier, France

23 <sup>8</sup> Groningen Institute of Evolutionary Life Sciences (GELIFES), University of Groningen,  
24 Nijenborgh 7, 9747 AG Groningen, The Netherlands

25 \*Correspondence: Davide M. Dominoni, [davide.dominoni@glasgow.ac.uk](mailto:davide.dominoni@glasgow.ac.uk)

26

## 27 **Abstract**

28 Globally increasing levels of artificial light at night (ALAN) are associated with shifts in circadian  
29 rhythms of behaviour in many wild species. However, it is still unclear whether changes in  
30 behavioural timing are underlined by parallel shifts in the molecular clock, and whether such  
31 internal shifts may differ between different tissues and physiological pathways, which could  
32 highlight circadian disruption. We tackled these questions in a comprehensive study that  
33 integrated behavioural, gene expression and metabolomic analyses. We exposed captive male  
34 great tits (*Parus major*) to three ALAN intensities or to dark nights, recorded their activity  
35 rhythms and obtained mid-day and midnight samples of brain, liver, spleen and blood. ALAN  
36 advanced wake-up time, and this shift was paralleled by an advance in the expression of the  
37 clock gene *BMAL1* in all tissues, suggesting close links of brain and peripheral clock gene  
38 expression with activity rhythms. However, several metabolic and immune genes were  
39 desynchronised the shifted *BMAL1* expression, suggesting circadian disruption of behaviour and  
40 physiology. This result was reinforced by untargeted metabolomic profiling, which showed that  
41 only 9.7% of the 755 analysed metabolites followed the behavioural shift. We suggest circadian  
42 as a key mediator of the health impacts of ALAN on wild animals.

43

44

45

## 46 **Introduction**

47 On our rhythmic planet, organisms have adapted to the change of day and night by evolving  
48 circadian rhythms that are highly sensitive to light [1]. The near-ubiquity of circadian rhythms  
49 across kingdoms of life suggests major fitness benefits on two grounds. Internally, the circadian  
50 system regulates temporal coordination within the body to reduce conflict and overlap between  
51 different processes. Externally, the circadian system anticipates environmental fluctuations,  
52 enabling organisms to align their behavior and physiology with nature's cycles [1,2], such as the  
53 daily alternation of light and darkness. However, globally most humans and wild organisms in  
54 their vicinity are now exposed to artificial light at night (ALAN), and thus to a rapidly altered light  
55 environment [3,4] that threatens the refined functioning of the circadian system.

56 In animals, rhythmicity is primarily generated on a molecular level by a transcription-  
57 translation feed-back loop (TTFL). This rhythmicity is modulated by multiple interacting systems,  
58 including neuronal, endocrine, metabolic and immune pathways [5,6][7]. The orchestration of  
59 these processes involves complex interactions between sensory input, central and peripheral  
60 clocks, and effector systems [2]. There is increasing evidence that ALAN disrupts these  
61 processes, with possible consequences ranging from compromised human health to loss of  
62 ecosystem functions [8–10]. In free-living and captive organisms, altered daily and annual  
63 activity has been widely reported, and experimental illumination has confirmed causal effects of  
64 ALAN [11,12]. Still, it is largely unclear whether the circadian system, its multiple components,  
65 and the physiological pathways it coordinates, remain synchronized with activity patterns [13–  
66 18]. ALAN has also been shown to induce physiological changes, including in endocrine, immune  
67 and metabolic pathways [15,19,20]. These changes could be due to circadian disruption, with  
68 possible negative consequences for fitness [9,21]. Addressing these issues requires multi-level

69 analyses that simultaneously examine effects of ALAN on rhythmic behavior and different  
70 physiological pathways [9], but these are currently lacking.

71 Here we aim to fill this gap by an integrated study of a bird, the great tit (*Parus major*),  
72 whose behavioral response to ALAN is well-characterized [11,22–26]. We measured day-night  
73 differences in gene transcripts in multiple tissues and in blood metabolites under a realistic  
74 range [27,28] of experimental ALAN and in dark controls, and investigated links to behavioral  
75 rhythms. The selected genes represented the circadian TTFL (Brain and Muscle ARNT-Like 1,  
76 *BMAL1*, alias *ARNTL*; cryptochrome 1, *CRY1*), a clock modulator (*casein kinase 1ε*, *CK1ε*) [29],  
77 and endocrine, immune and metabolic pathways putatively affected by circadian disruption  
78 (Table S1). Tissues included central pacemaker and memory sites (hypothalamus, where  
79 important avian circadian pacemaker components are located [29], and hippocampus; Fig. S1),  
80 and metabolic (liver) and immune tissues (spleen). Testes of the same birds were analyzed in a  
81 separate study [30]. In contrast to the candidate gene approach, our untargeted metabolomics  
82 approach captured both expected and novel effects of ALAN [31]. We aimed to identify whether  
83 i) hypothalamic clock gene expression was affected by ALAN, ii) potential temporal shifts in clock  
84 gene expression were consistent across tissues, iii) behavioral and clock gene rhythms were  
85 aligned, and iv) transcript and metabolite temporal shifts were consistent across physiological  
86 pathways. Any inconsistencies in temporal shifts indicate the potential for internal  
87 desynchronization, and hence, circadian disruption [9,21].

88 Great tits are a rewarding study system because their urbanized distribution allows to  
89 study ALAN responses also in free-living individuals, because detailed molecular and circadian  
90 information is available [32–34], and because like humans, they are diurnal [9,11,22]. We  
91 studied 34 male great tits under simulated winter daylength (LD 8.25:15.75 h) in four treatment

92 groups, ranging from dark night controls to 5 lx (Table S2, S3), and sampled metabolites and  
93 transcripts at mid-day (3 h 30 min after lights on; i.e. 3.5 h Zeitgeber time) and midnight (7 h 15  
94 min after lights off; i.e. 15.5 h Zeitgeber time). We chose a study design that enabled detection  
95 of rhythmicity and ALAN effects from sampling two time-points 12 h apart [35,36]. The design  
96 was enhanced firstly by tracking possible shifts in circadian rhythms by a focal clock gene,  
97 *BMAL1*, whose transcription under dark nights in songbirds peaks in the late evening [29].  
98 Secondly, we applied ALAN levels that advance activity of captive great tits by 6 h [22] and thus,  
99 if molecular rhythms track behavior, day-night differences at all phase positions are captured.

100 Our specific predictions are illustrated in Figure 1, which shows expected patterns for  
101 *BMAL1*. Under dark nights (Fig. 1A, green curve), during midnight sampling (blue dots) *BMAL1*  
102 transcripts will have just passed the peak (maximum), and during mid-day (yellow dots) they will  
103 have just passed the trough (minimum). Under our hypothesis, the TTFL matches behavior, and  
104 thus, with increasing ALAN (red curves), the *BMAL1* rhythm will also advance. Hence, at  
105 midnight *BMAL1* levels will be measured progressively later than the peak, and drop, whereas  
106 mid-day levels will be measured closer to the next peak, and hence rise. When combining  
107 midnight and mid-day data (Fig. 1B), we thus expected a cross-over of detected *BMAL1* levels.  
108 Other rhythmic compounds should show similar patterns, although the point of intersection and  
109 precise change of level depends on their phase. In contrast, if the TTFL does not match the  
110 behavioral shift by ALAN, compound levels will show as two horizontal lines across ALAN,  
111 representing day and night, respectively. Levels of non-rhythmic compounds will fall on a  
112 horizontal line, representing both day and night.

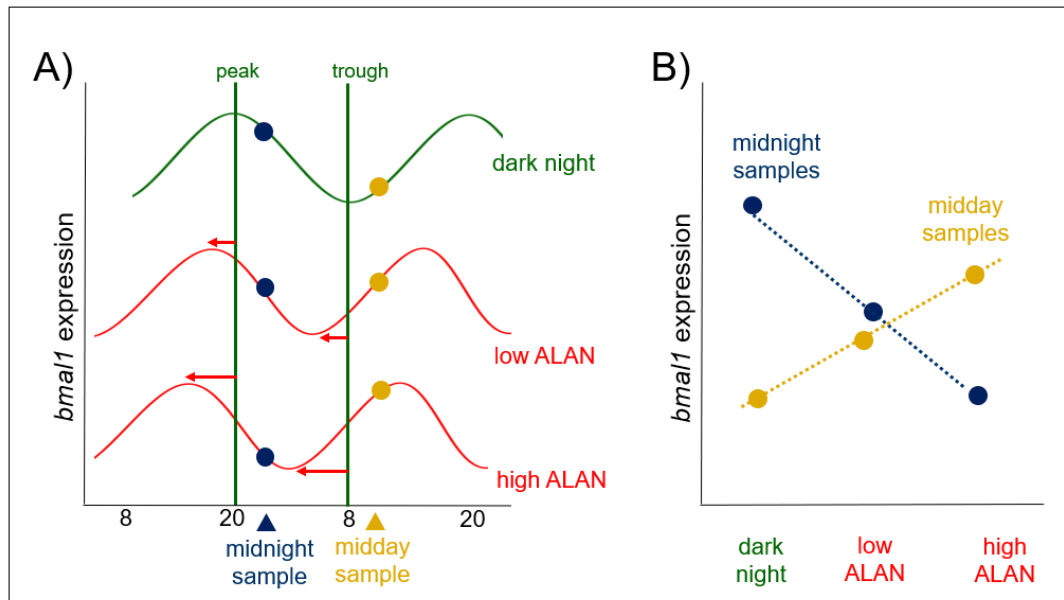

113

114 **Figure 1. Expected clock gene rhythm advance in response to ALAN.** Schematic shows ALAN  
115 effects on transcript levels of *BMAL1* measured at midnight (blue) and mid-day (yellow). (A)  
116 Rhythm of ALAN under dark night shown as green curve; if the gene's rhythm advances (red  
117 curves) with increasing ALAN, transcript levels sampled at midnight will drop, whereas those  
118 measured at mid-day will rise; horizontal arrows indicate the advance of the *BMAL1* peak. (B)  
119 The trends of transcripts with increasing ALAN therefore cross for mid-day vs. midnight  
120 sampling.

121

## 122 Results

### 123 *ALAN advances circadian timing of activity and BMAL1 expression*

124 Daily cycles of activity were strongly affected by the ALAN treatment (GAMM,  $p=0.001$ , Fig. 2A  
125 and Fig. S2; Table S4). In the 5 lx group birds were generally active 6-7 h before lights-on,  
126 whereas birds in the other two light treatments (0.5 and 1.5 lx) advanced morning activity to a  
127 much lesser extent. This advancement in the onset of morning activity led to 40% of the overall  
128 diel activity in the 5 lx group to occur during the night, compared to 11 and 14% in the 0.5 and  
129 1.5 lx groups, and less than 1% in the control dark group. Thus, with increasing ALAN, nocturnal  
130 activity also increased (LMM, treatment  $p < 0.001$ , Fig. 2A and Table S5).

131

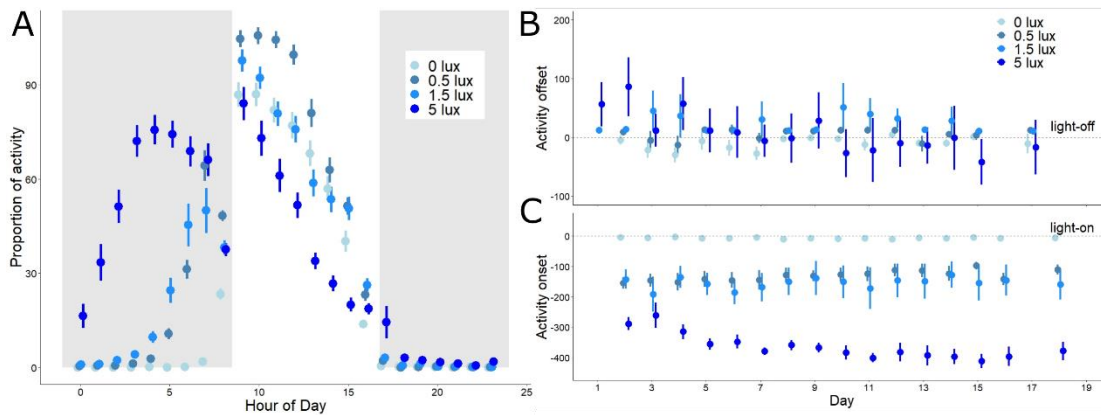

132

133 **Figure 2. Activity timing is affected by intensity of light at night.** The proportion of active 2-min  
134 intervals in each treatment group per hour of the day is shown in panel (A) (raw mean  $\pm$  SEM, N  
135 = 34). Grey background indicates night-time, white background indicates daytime. On the right,  
136 we show daily treatment group data (mean  $\pm$  SEM), for the timing of (A) evening offset and (B)  
137 morning onset of activity (time in min). Activity onset and offset refer to times of lights-on and  
138 lights-off, which are shown as the horizontal lines crossing zero in both panels.

139

140

141

142

143

144

145

146

147

148

149

150

151

152

Breaking down this average diel profile (Fig. 2A) by time since first exposure to ALAN (i.e., days from start of the experiment to first sampling, days 0 to 18) yields insights into how differences in activity developed, and into circadian mechanisms involved (Fig. 2B-C). Upon exposure to ALAN, the birds' activity onset (Fig. 2C) advanced in all treatment groups. In the groups with intermediate light exposure (0.5 lx, 1.5 lx) the phase-advance occurred instantaneously and to a similar extent (155 and 142 min for the 0.5 and 1.5 lx groups respectively,  $P > 0.1$  for this pairwise comparison), but thereafter timing remained stable. The group exposed to 5 lx showed an even larger instantaneous phase advance of an average of almost five hours (mean  $\pm$  SEM =  $289 \pm 21$  min), but thereafter continued to gradually phase-advance until reaching a stable phase after 10 days (interaction treatment\*day,  $p < 0.001$ , Fig. 2C, Table S2). The advance until stabilization could equally represent gradual entrainment to an early phase, or temporary free-run of activity, as suggested by periodogram analysis. Indeed, we

153 found that in the 5 lx group, prior to stabilization, period length deviated from that of all other  
154 groups and from 24 h, reaching levels similar to those of free-running conspecifics in an earlier  
155 study [37] (mean period length 5 lx group: 23.6 h; LM; Table S6). The individual actograms (Fig.  
156 S3) further suggest that the activity rhythm in the 5 lx group may have split into an advancing  
157 morning component and a more stably entrained evening component, suggesting internal  
158 desynchronization.

159 Changes in the activity offset were much less pronounced (Fig. 2B). The 5 lx group  
160 showed an instantaneous phase-shift, which in contrast to morning activity delayed, rather than  
161 advanced, activity compared to the lights-off time. This initial delay was followed by a gradual  
162 advance of evening offset, similar to but smaller than that of morning onset. At the end of the  
163 experiment birds in the 5 lx group ceased their activity before lights-off, and earlier than other  
164 groups (treatment\*day,  $p < 0.001$ , Fig. 2B, Table S5). This advance did not compensate for the  
165 earlier onset, as birds in the 5 lx group were more active over the whole 24h than the remaining  
166 birds (treatment\*day,  $p = 0.01$ , Table S5).

167

### 168 ***Hypothalamic BMAL1 expression at night parallels advanced activity onset***

169 We next sought to identify whether the profound shifts in activity patterns were paralleled by  
170 corresponding shifts in the pacemaker, measured by expression of *BMAL1* in the hypothalamus.  
171 Day-night differences in transcripts of *BMAL1* inverted with increasing ALAN (Fig. S4A), as  
172 predicted above (Fig. 1). While *BMAL1* expression was higher at midnight than at mid-day for  
173 the control birds, increasing ALAN induced a reversal of this pattern, so that birds in the 5 lx  
174 group had much higher expression at mid-day than at midnight (treatment\*time,  $p < 0.01$ , Table  
175 S7).



176 To assess whether changes in day-night *BMAL1* gene expression correlated with  
177 temporal behavioral shifts, we related *BMAL1* levels to onset of activity of an individual once it  
178 had stably shifted in response to the ALAN treatment (Fig. 2B, 2C, after 10 days). Onset was  
179 closely predicted by hypothalamic *BMAL1* expression at midnight (Gaussian LM,  $p < 0.001$ ,  
180  $R^2 = 0.71$ , Fig. 3A). Across ALAN levels, the earliest rising birds had the lowest midnight expression  
181 of *BMAL1*. However, the steep linear regression was largely based on differences between ALAN  
182 groups in both activity timing (Figs. 2, 3) and *BMAL1* expression (Fig. S4A). Indeed, this  
183 relationship was even stronger when we only considered the 0.5, 1.5 and 5 lx group in the  
184 analysis (Gaussian LM  $p < 0.001$ ,  $R^2 = 0.85$ ), but the association was not present for the dark  
185 control birds (Gaussian LM,  $P = 0.87$ ). Individual midnight *BMAL1* levels were also predictive of  
186 mean offset of activity, albeit less strongly so than for onset (Gaussian LM,  $p = 0.006$ ,  $R^2 = 0.28$ , Fig.  
187 3B). Conversely, mid-day *BMAL1* levels did not significantly predict variation in any of the  
188 activity traits (Gaussian LMs,  $p > 0.1$  and  $R^2 < 0.16$  for all measures, Fig. 3C-D).  
189

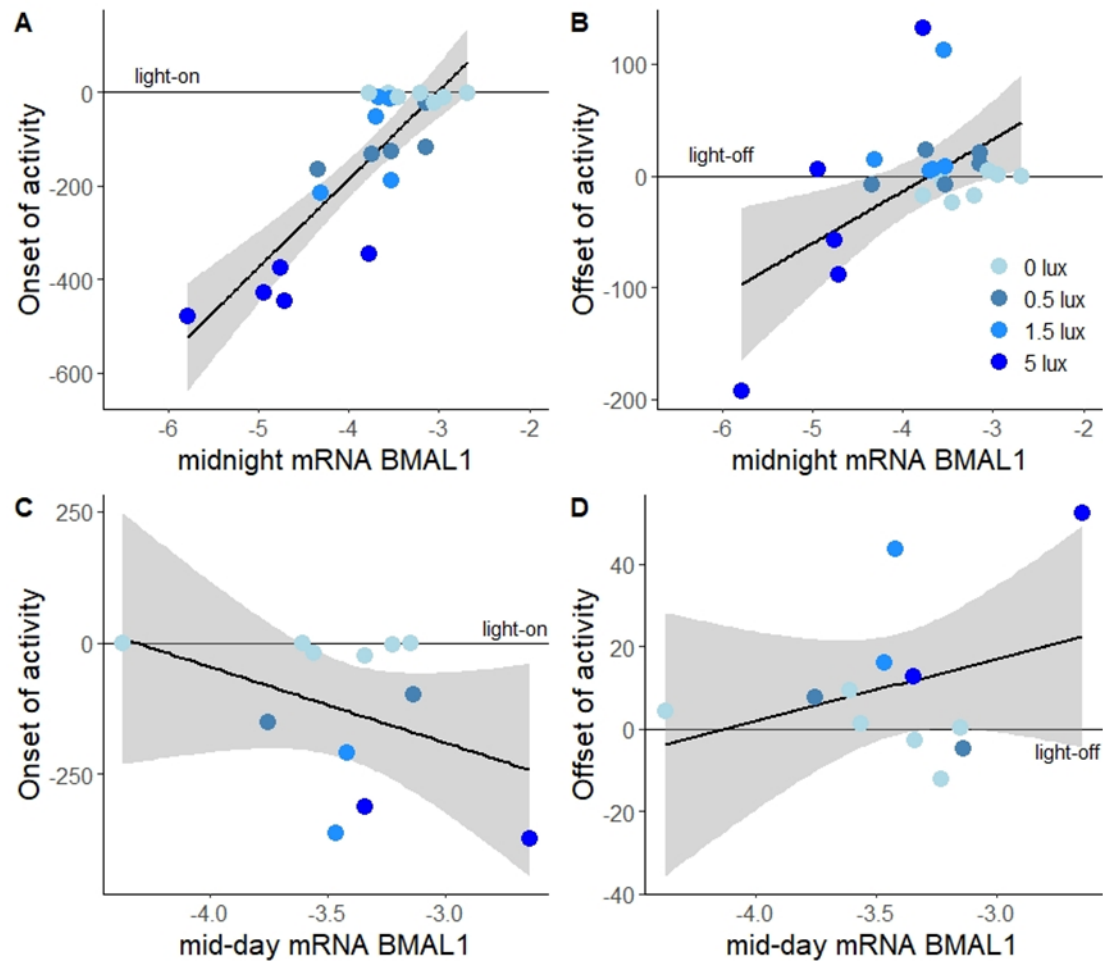

190

191 **Figure 3. *BMAL1* expression in the hypothalamus predicts the advance of morning activity.**  
192 mRNA levels of *BMAL1* at midnight correlated with the onset (A) and offset of activity (B), but  
193 mid-day levels (C, D) did not. Shown are log-transformed mRNA levels, separated by sampling  
194 time (day vs night) and ALAN treatments (blue color gradient). Points represent individual birds  
195 (total N = 34), lines and shaded areas represent model fits  $\pm$  95% confidence intervals.  
196

197

### 198 ***ALAN reverses day-night *BMAL1* expression patterns in multiple tissues***

199 ALAN-induced shifts in *BMAL1*, as detected in the hypothalamus, were remarkably consistent  
200 across tissues. Hippocampal *BMAL1* expression profiles resembled those in the hypothalamus  
201 (Fig. S5A) and were strongly affected by the interaction of treatment and sampling time  
202 ( $p < 0.001$ , Table S8). Within individuals, mid-day and midnight transcripts in both brain tissues

203 were closely related (LM,  $p < 0.001$ , Fig. 4A, Table S9). Also liver *BMAL1* showed similar effects of  
204 ALAN on day-night expression profiles (Fig. S6A; time\*treatment,  $p < 0.001$ , Table S10), so that  
205 within individuals, hepatic and hypothalamic transcripts also correlated closely (LM,  $p < 0.001$ ,  
206 Fig. 4B, Table S9). These findings were consolidated by parallel ALAN effects on *BMAL1*  
207 expression in the spleen (Fig. S7A; time\*treatment,  $p = 0.003$ , Table S11), and close individual-  
208 level correlation of spleen transcripts with those in hypothalamus (LM,  $p = 0.011$ , Fig. 4C) and  
209 liver (LM,  $p = 0.001$ , Fig. 4D, Table S9).

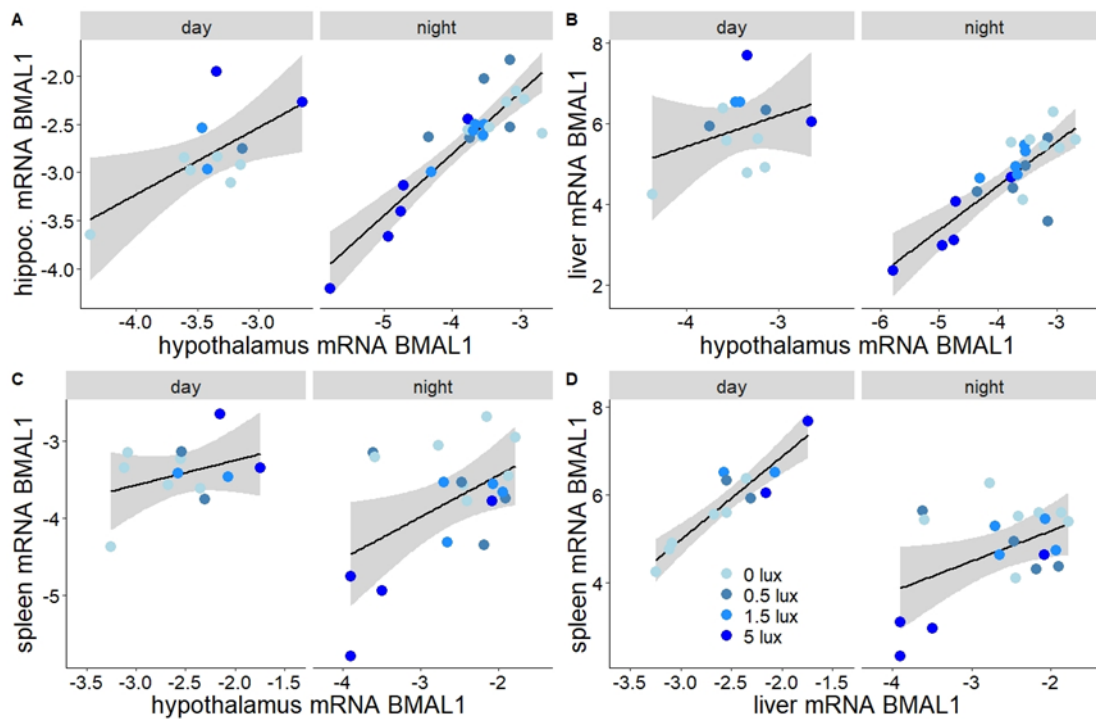

210

211 **Figure 4. ALAN effects on *BMAL1* expression were comparable in different tissues.** Correlation  
212 of expression patterns of *BMAL1* in different tissues. Shown are log-transformed mRNA levels,  
213 separated by sampling time (day vs night) and ALAN treatments (blue color gradient). Points  
214 represent individual birds (N = 34). Lines and shaded areas depict model estimated means  $\pm$  95%  
215 confidence intervals. Panels show expression levels of hypothalamic *BMAL1* levels in relation to  
216 (A) hippocampus, (B) liver and (C) spleen levels, as well as spleen in relation to liver levels (D).  
217

218

219

220 ***Partial disruption of expression patterns by ALAN in other genes***

221 We next sought to assess whether the same reversal of day-night expression patterns  
222 found for *BMAL1* was paralleled in other genes analyzed in the different tissues. We found  
223 mixed evidence for this, as in most of the pathways we examined some genes shifted in concert  
224 with *BMAL1*, while others did not. This suggests that different pathways were differentially  
225 affected by ALAN.

226 Among clock-related genes, hypothalamic expression levels of *CK1ε*, a clock modulator,  
227 was not affected by the light treatment ( $p=0.71$ ). Expression was consistently, although not  
228 significantly, higher at mid-day ( $p=0.09$ , Fig. 5H, Table S7). Similarly, the same gene was not  
229 significantly affected by sampling time or treatment in the liver. Expression of hepatic *CK1ε*  
230 increased with light intensity, albeit not significantly so ( $p=0.078$ , Fig. 5P, Table S10), and was not  
231 affected by sampling time ( $p=0.13$ , Table S10). In the liver another circadian gene, *CRY1*, showed  
232 no expression trend that aligned with that of *BMAL1* (Fig. 5O). Moreover, *CRY1* was not affected  
233 by treatment or sampling time ( $P>0.6$  for both variables, Fig. 5O, Table S10).

234 Among metabolic genes, patterns similar to those in *BMAL1* were evident in *SIRT1*, a  
235 gene which is also involved in the modulation of the circadian cycle [38][39] (Table S1).  
236 Hypothalamic *SIRT1* showed a clear change of day-night expression with increasing ALAN (Fig.  
237 5E; treatment\*time,  $p = 0.029$ , Table S7), and *SIRT1* mRNA levels were closely related to those of  
238 hypothalamic *BMAL1* (LM,  $p<0.001$ , Table S9). In the liver, the metabolic gene *NRF1* showed a  
239 similar response to ALAN as *BMAL1*, with reversed day-night expression in the 5 lx group  
240 compared to other groups (treatment\*time,  $p<0.001$ , Fig. 5F, Table S10), and close correlation  
241 with *BMAL1* (LM,  $p<0.001$ ). In contrast, another hepatic metabolic gene, *IGF1*, was not  
242 significantly affected by light treatment or sampling time (for both,  $p>0.11$ , Fig. 5Q, Table S10).

243 In the hippocampus (Table S8), mid-day and midnight levels of the mineralocorticoid receptor,  
244 *MR*, decreased significantly with increasing ALAN ( $p=0.044$ , Fig. 5M). Levels were higher at night  
245 than during the day, albeit not significantly so ( $p=0.1$ ). Last, the levels of the glucocorticoid  
246 receptor, *GR*, showed no significant relationship with either light treatment or sampling time  
247 ( $p>0.33$  in both cases, Fig. 5N).

248 Among immune genes, ALAN affected the hypothalamic mRNA levels of *LY86*, which  
249 showed reduced levels with increasing ALAN ( $p=0.04$ , Fig. 5K, Table S7). Expression of this gene  
250 tended to be lower at midnight than mid-day, albeit not significantly so ( $p=0.08$ ). However, the  
251 same gene analyzed in the spleen was not affected by either treatment or sampling time ( $p>0.7$ ,  
252 Fig. 5L, Table S11). Conversely, another immune gene in the spleen, *TLR4*, showed the same  
253 pattern as *BMAL1* (Fig. 5G, time\*treatment,  $p=0.006$ , Table S11).

254 Last, we also analyzed genes involved in photoperiod seasonal response in the avian  
255 brain. *FOXP2*, a gene that in birds is involved in learning, song development and photoperiod-  
256 dependent seasonal brain growth, showed no significant trends related to ALAN or sampling time  
257 ( $p>0.32$  in both cases, Fig. 5J). *DIO2*, a thyroid-axis gene involved in photoperiodic reproductive  
258 activation, was also not affected by either ALAN or sampling time ( $p>0.45$  for both variables, Fig.  
259 5I).

260

261

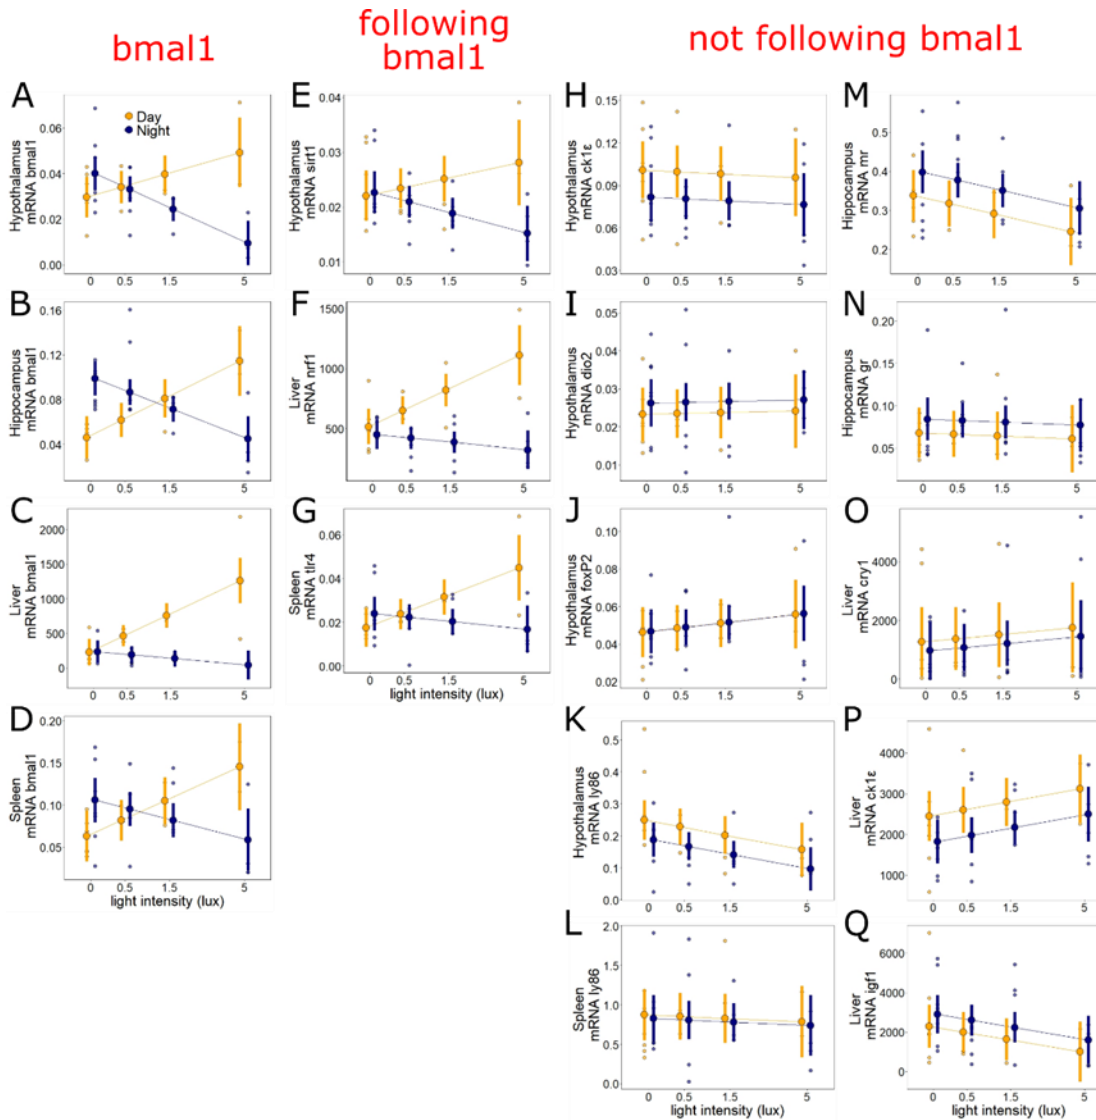

262

263 **Figure 5. ALAN effects on gene expression are gene-specific.** ALAN does not equally affect all  
 264 physiological systems. ALAN effects on *BMAL1* (A)-(D) were paralleled by those on three  
 265 additional genes in the hypothalamus (*SIRT1*), liver (*NRF1*) and spleen (*TLR4*) (E)-(G), but not by  
 266 other genes analyzed across tissues (H)-(Q). Shown are log-transformed mRNA levels, separated  
 267 by sampling time (mid-day: yellow; midnight: dark blue). Large symbols  $\pm$  SEM connected by  
 268 lines represent model estimates, whereas small symbols depict raw data points (N = 34 birds).  
 269

270

271

272

273 ***Metabolomic profiles support only a limited reversal of day-night physiology under ALAN***

274 To explore the different impacts of ALAN on whole-body physiology, we carried out  
275 untargeted LC-MS metabolomic analysis and obtained abundance values for 5483 compounds.  
276 Out of these, 682 were annotated as known metabolites based on accurate mass and predicted  
277 retention time [40] and 73 were identified based on accurate mass measurement and matching  
278 retention time to a known standard (within 5%), for a total of 755 metabolites. We ran  
279 individual linear mixed models for all these 755 metabolites (correcting for false discovery rate  
280 at 5%), and found that 44.1% (333) differed significantly by sampling time, with higher levels at  
281 mid-day in 197, and higher levels at midnight in 136 (to see all metabolite tables:  
282 <https://doi.org/10.6084/m9.figshare.12927539.v1>). For 29 metabolites we found significant  
283 effects of treatment (Table S12). The direction of the treatment effect depended on the  
284 metabolite considered. In 11 metabolites, levels decreased with ALAN, while in the remaining 18  
285 metabolites an increase was observed when compared to the dark night control group. Finally,  
286 73 (9.7%) of the 755 metabolites showed significant interaction between treatment and  
287 sampling time (Fig. 6 and Table S13; 34 of those also differed by sampling time). As this pattern  
288 supported reversal of day-night physiology similar to that shown for activity and *BMAL1*  
289 expression, these metabolites were selected for subsequent focal analyses (hereafter named  
290 “interactive dataset”).

291 We dissected variation in the interactive dataset by using two principal component  
292 analyses (PCA) on the samples collected at mid-day and midnight (Fig. 6C, D). For mid-day  
293 samples, ALAN treatments overlapped considerably (Fig. 6C), although low values of PC1 (26 %  
294 of variance explained) aligned with some of the birds in the 1.5 lx and 5 lx treatments. PC1 in the  
295 mid-day dataset was heavily loaded with metabolites of Arginine biosynthesis pathway,

296 including L-Arginine, Homoarginine and L-Glutamate, as well as other important amino acids  
297 such as L-Threonine, L-Lysine and L-Tyrosine. Conversely, the midnight samples (Fig. 6D)  
298 separated clearly between the 5 lx treatment and the remaining groups. In this midnight PCA,  
299 PC1 explained 27% of the variance and was heavily loaded with metabolites of the Glutamate  
300 and Arginine pathways, as well as with N-acetyl-L-aspartate. PC2, which explained 21% of  
301 variation, was heavily loaded with fatty acids, including Linoleate (to see all factor loading  
302 tables: <https://doi.org/10.6084/m9.figshare.12927536.v1>). The contribution of the Arginine  
303 pathway was further confirmed by pathway analysis, conducted with Metaboanalyst [41], which  
304 indicated “Arginine biosynthesis” as a highly significant pathway in this interactive dataset  
305 ( $p < 0.001$ ). “Aminoacyl-tRNA metabolism” ( $p < 0.001$ ), “Histidine metabolism” ( $p = 0.005$ ), and  
306 “Alanine, Aspartate and glutamate metabolism” ( $p = 0.026$ ) were also indicated as significant  
307 pathways.

308 We finally investigated whether, just like midnight levels of *BMAL1* expression (Fig. 4),  
309 midnight principal components of metabolites correlated with individual activity timing. PC1  
310 strongly predicted the onset of activity via a linear and quadratic relationship ( $n = 19$ ,  $p_{\text{linear}} =$   
311  $0.007$ ,  $p_{\text{quadratic}} = 0.014$ ,  $R^2 = 0.92$ , Fig. 6E), but did not explain offset of activity ( $p = 0.63$ ,  $R^2 = 0.04$ ,  
312 Fig. 6F). PC2 was related to neither timing trait ( $p > 0.2$ ).



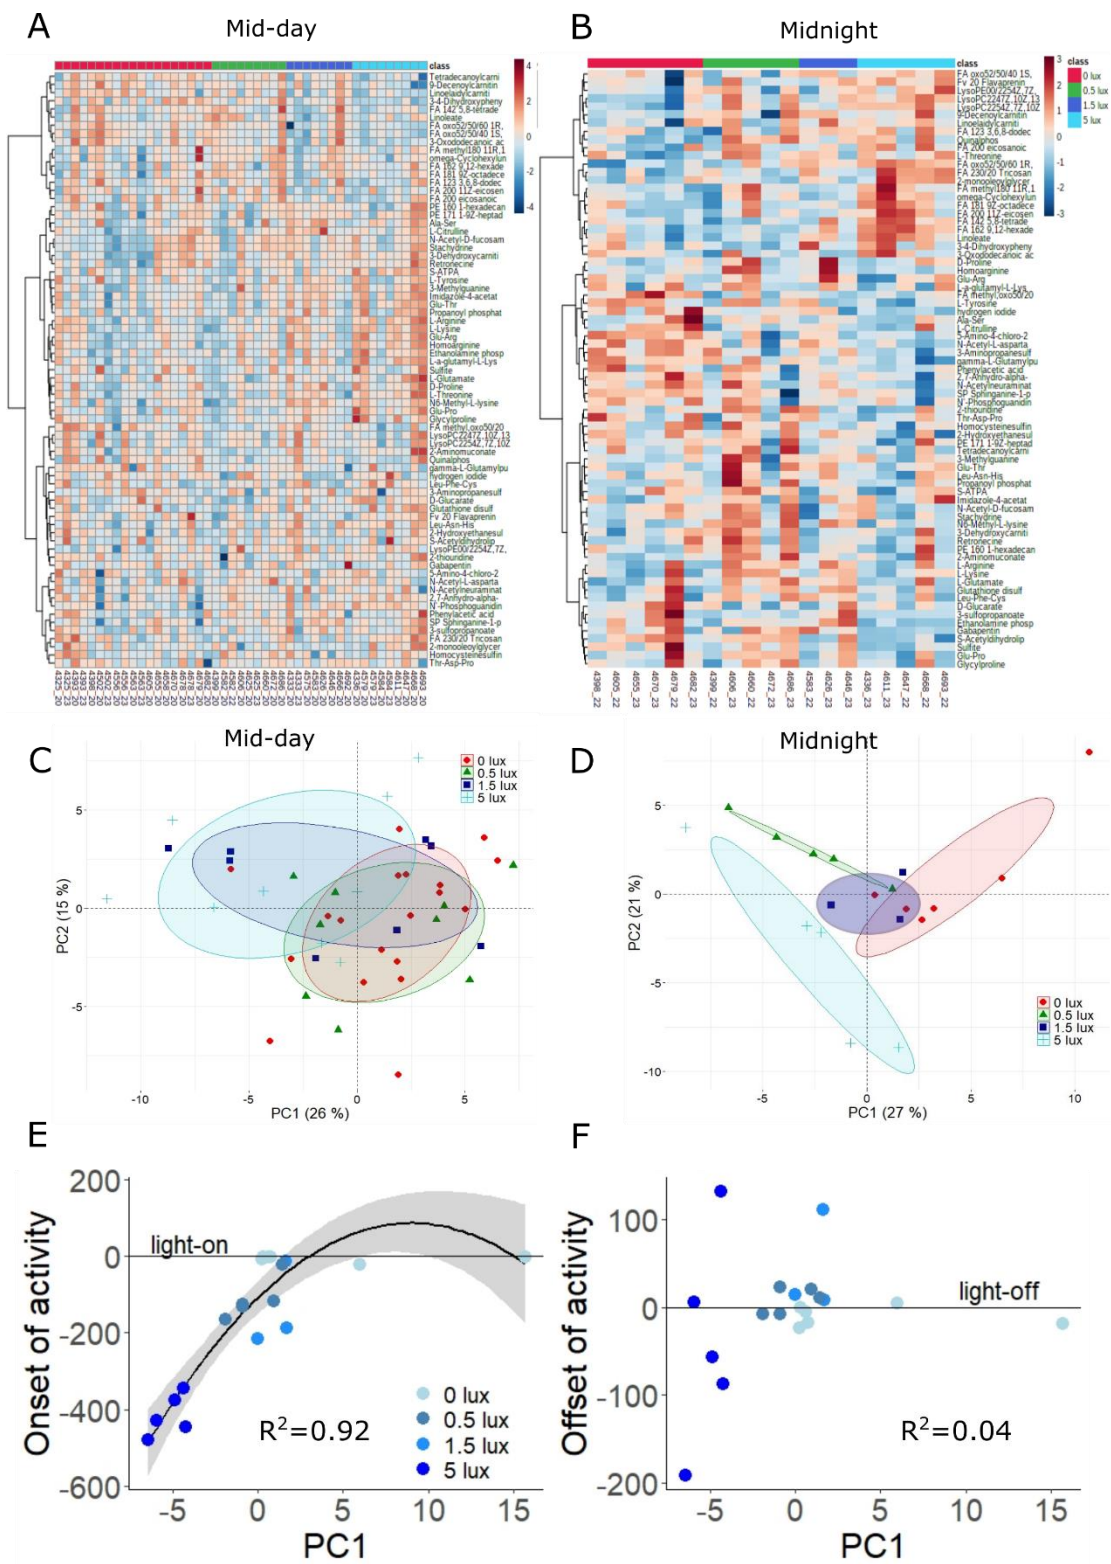

313

314

315 **Figure 6. Metabolomics analysis supports ALAN-induced shifts in day-night physiology.** The 73  
316 metabolites found to be significantly affected by the interaction of treatment and sampling time  
317 (9.6% of all metabolites, interactive dataset) were dissected by means of pathway analysis and  
318 principal component analysis. Pathway analysis revealed that the Arginine Biosynthesis pathway  
319 was particularly enriched in this dataset. Heatmaps show the top-25 metabolites in the interactive  
320 dataset at either mid-day (A) or mid-night (B). Principal component analysis showed considerable  
321 overlap between ALAN groups at mid-day (C), whereas ALAN treatment effects were mostly  
322 visible at midnight, particularly for the 5 lx group (D). In all PCA plots, points represent individual  
323 samples, and ellipses contain 80% of samples in a group. The first PC of the night cluster (E)  
324 significantly predicted the onset of activity in the morning (D), but not the offset of activity in the  
325 evening (F). In (E) and (F) points represent individual birds (N = 19), and lines and shaded areas  
326 represent model fits  $\pm$  95% confidence intervals.  
327

## 328 Discussion

329 Birds advanced the circadian timing of their activity as expected with increasing levels of ALAN,  
330 and in parallel the gene expression of our focal clock gene, *BMAL1*, was also advanced in the  
331 hypothalamus. Advances in *BMAL1* were consistent across tissues, indicating a shift of the  
332 circadian system in tissues implicated in timing, memory, metabolism and immune function.  
333 Furthermore, advances in nocturnal *BMAL1* potentially correlated with activity onset at the  
334 individual level, consolidating close links between core clock gene expression and behavior.  
335 Responses of *BMAL1* expression were paralleled by a minority of other genes. Similarly, only  
336 9.7% of the metabolome followed the same shift observed in *BMAL1*, indicating that most  
337 physiological pathways were desynchronized from the circadian system. The emerging picture is  
338 that birds shifted their internal clock time under ALAN, but suffered a high degree of internal  
339 desynchronization.

340 On a behavioral level, our findings closely match those of earlier demonstrations of  
341 advanced daily activity under ALAN in captivity for several avian species, including the great tit  
342 [15,22,24,42]. In the wild, birds also advanced daily activity under ALAN, although to a lesser  
343 extent (e.g. [14,26,43]), and often in onset but not offset [25,26,28,44,45]. Previously,

344 behavioral shifts were interpreted as not involving the circadian clock [24]. In an experiment  
345 also on the great tit, Spoelstra and colleagues [24] exposed birds to dark nights and then to  
346 ALAN as in our study. Subsequently, birds were released to constant low-levels of dim light (0.5  
347 lx), where they free-ran. The study found that the birds free-ran from the timing they had shown  
348 under initial dark nights, rather than from their advanced timing under ALAN. Thus, the authors  
349 concluded that the behavioral response to ALAN was due to masking, while the internal clock  
350 remained unchanged [24]. Our molecular data suggest a different conclusion, namely that  
351 within three weeks of ALAN exposure, internal time had phase-advanced in concert with  
352 behavior. These discrepancies are difficult to interpret because inferences of the studies are  
353 based on different criteria (molecular vs. behavioral) and different experimental phases (during  
354 ALAN vs. during ensuing free-run), but it is clear that additional experimental data are needed.

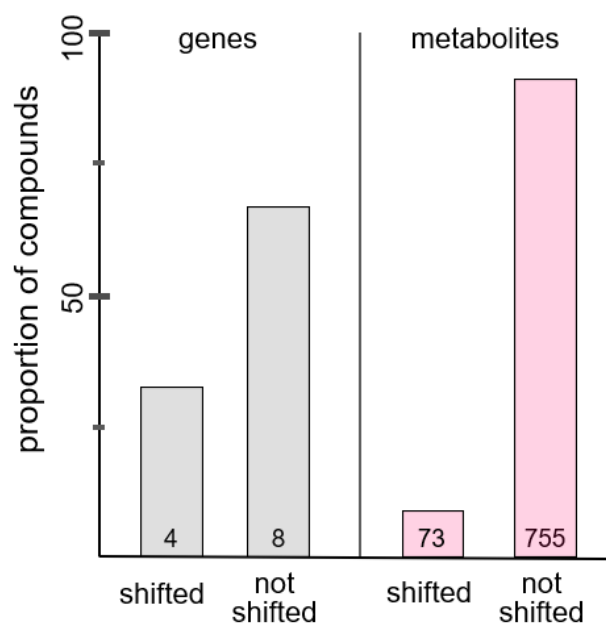

355

356 **Figure 7. Proportion of shifts in day-night pattern in response to ALAN.** Shown are proportions  
357 of genes (grey) and metabolites (red) whose levels were, or were not, significantly impacted by  
358 the interaction of sampling time and ALAN level.

359

360 Our transcriptional findings of ALAN-altered rhythmicity gain support from a comparison  
361 of clock gene expression in Tree sparrows (*Passer montanus*) from an illuminated urban and  
362 dark non-urban habitat [46]. Sampled within a day after being brought into captivity, urban  
363 birds showed clear advances in the circadian system, including, as in our birds, in hypothalamic  
364 *BMAL1*. Other experimental studies have also confirmed effects of ALAN on avian rhythms in  
365 brain and other tissues [16,17]. In our study, only some of the investigated regulatory genes  
366 aligned with the ALAN-dependent advances of rhythms in behavior and *BMAL1*. The genes from  
367 metabolic pathways that have close molecular links to the TTFL, *SIRT1* and *NRF1*, mirrored  
368 ALAN-dependent changes in *BMAL1*. However, regulatory genes of immune pathways  
369 responded inconsistently, whereby *TLR4* aligned with *BMAL1* whereas *LY86* did not. The learning  
370 gene, *FOXP2* and the thyroid-activating gene *DIO2* did not mirror the changes in *BMAL1*, nor did  
371 the endocrine genes (*MR*, *GR*, *IGF1*). Conversely, in a complementary study on these same birds,  
372 we observed that ALAN exposure, which also activated the reproductive system, shifted the day-  
373 night expression patterns of corticoid receptors [30].

374 Other experimental studies have confirmed that effects of ALAN on avian rhythms in  
375 brain and other tissues differed between genes and pathways. For example, a study on Zebra  
376 finches (*Taeniopygia guttata*) reported ALAN-induced changes in rhythmic expression of  
377 hypothalamic *CRY1* but not *BMAL1* [16]. This differs from our findings, where advances in  
378 *BMAL1* were not paralleled by *CRY1* [17], and from findings that *BMAL1* and *CRY1*, but not  
379 another TTFL gene, *CLOCK*, advanced in an urban bird [47]. Divergent responses between clock  
380 genes might participate in circadian disruption, and could underlie discrepant behavioral  
381 responses, such as differences between activity onset and offset observed in our study, and in  
382 wild great tits [25,26,44] and other avian species [28,45]. In our study in the 5 lx group, we also

383 observed splitting of rhythms, which has previously been linked to reproductive activation [48],  
384 a known side-effect of ALAN [13].

385 Our metabolomic data corroborated our main findings on gene expression. Of the 755  
386 identified metabolites, nearly 50% (333) differed between mid-day and mid-night levels.  
387 However, less than 10 % showed changes in rhythm under ALAN (Fig. 7). These findings confirm  
388 that some, but not all featured pathways aligned with shifts in behavior and *BMAL1*. Our  
389 findings from captive wild birds under ALAN match those from human studies. To identify the  
390 mechanisms by which circadian disruption drives metabolic disorders and other pathologies,  
391 these studies severely disrupted the circadian system by sleep deprivation and shift-work  
392 protocols [31,49,50]. The reported changes in gene expression and metabolite levels were  
393 similar to those of our birds under ALAN, including highly responsive pathways and compounds,  
394 in particular Arginine [50], an amino acid strongly linked to circadian rhythms and innate  
395 immune responses [51]. Glutamate production from arginine is well known [52], and changes in  
396 these two metabolites may be due to changes in energy requirements at the different light  
397 intensities. N-acetyl-aspartate, a metabolite involved in energy production from glutamate [53],  
398 was also observed to follow changes in behavior and *BMAL1*. Both glutamate and arginine have  
399 a variety of biochemical roles [54,55], so further work would be required to determine which of  
400 these functions, if any, are associated to the behavioral and gene expression changes we  
401 observed. While preliminary, this data shows the potential of metabolomic techniques for  
402 furthering this area of research.

403 Despite our sampling design of only two time-points and low sample sizes, we derived  
404 descriptors of internal time (*BMAL1* expression; metabolomics PC1 of interactive dataset) whose  
405 midnight levels had high predictive power of activity timing. Thereby, we have shown that

406 internal time can be captured in birds by a single sample of blood or tissue, a frontline ambition  
407 of biomedical research [35,36]. Our predictive power was limited to treatment groups and  
408 within-ALAN individuals, whereas birds kept under dark nights were highly synchronized to the  
409 sudden switch of lights-on.

410 For wild animals, our study adds to emerging evidence of detrimental effects of ALAN on  
411 physiological pathways [9,10,21]. For example, under ALAN molecular markers for sleep  
412 deprivation were elevated, hypothalamic expression of genes such as *TLR4* was altered [16],  
413 neuronal features in the brain were changed, and cognitive processes and mental health-like  
414 states were impaired [16,20,56,57]. Altered hepatic expression of several metabolic genes  
415 further suggested negative effects on gluconeogenesis and cholesterol biosynthesis [15].  
416 Consequences of ALAN-induced changes in immune function include increased host  
417 competence for infectious disease [58], indicating how effects on individuals may cascade to  
418 ecological or epidemiological scales.

419 Addressing effects of ALAN is therefore urgent [10,59]. Our data contribute to the rising  
420 evidence for dose-dependent responses of behavior and physiology [22,30,60], which might  
421 allow mitigating against ALAN impacts on wildlife by reducing light intensity [61]. Importantly,  
422 we detected substantial effects even at light intensities (0.5 lx) that are typically far exceeded by  
423 street illumination, and to which animals are exposed to in the wild [27,28]. These findings  
424 transfer to other organisms including plants, insects, and mammals including humans [12,62–65]  
425 and call for limits to the ever faster global increase in light pollution [3].

426

427

428

429

430

## 431 **Methods**

### 432 *Data availability*

433 The full details of our methods are presented in the *Supporting Information* document. Raw

434 data, created datasets and R scripts are available via Figshare:

435 [https://figshare.com/projects/Artificial\\_light\\_at\\_night\\_shifts\\_the\\_circadian\\_system\\_but\\_still\\_l](https://figshare.com/projects/Artificial_light_at_night_shifts_the_circadian_system_but_still_leads_to_physiological_disruption_in_a_wild_bird/88841)  
436 [eads\\_to\\_physiological\\_disruption\\_in\\_a\\_wild\\_bird/88841](https://figshare.com/projects/Artificial_light_at_night_shifts_the_circadian_system_but_still_leads_to_physiological_disruption_in_a_wild_bird/88841).

437

### 438 *Animals and experimental design*

439 We studied 34 hand-raised, adult male great tits that were kept in individual cages (90 × 50 × 40

440 cm) under simulated natural daylength and ambient temperature of 10 to 14 °C with *ad libitum*

441 access to food and water, as described in [30].

442 The experiment started on February 1<sup>st</sup>, 2014, when daylength was fixed at 8 h 15 min

443 light and 15 h 45 min darkness. During the day, all birds were exposed to full spectrum daylight

444 by high frequency fluorescent lights emitting ~1000 lx at perch level (Activa 172, Philips,

445 Eindhoven, the Netherlands). During the night, birds were assigned to four treatment groups

446 exposed to nocturnal light intensity of 0 lx (n = 13), 0.5 lx (n = 7), 1.5 lx (n = 7), or 5 lx (n = 7). In

447 composing these groups, we prioritized assigning birds to the dark night group to obtain reliable

448 benchmark data on day-night differences in gene expression. Lights were provided by warm

449 white LED light (Philips, Eindhoven, The Netherlands; for details on the spectral composition of

450 lights, see [22]).

451 On Feb 20<sup>th</sup> an initial blood sample (~200 µl) was collected from all birds at mid-day for

452 metabolomic profiling. On Feb 22<sup>nd</sup> birds were randomly assigned to mid-day or midnight groups



453 for culling to collect tissues for morphological and molecular analyses. The mid-day group was  
454 culled on Feb 22<sup>nd</sup>, whereas culling of the midnight group was divided over two subsequent  
455 nights (Feb 22<sup>nd</sup>: 12 birds; Feb 23<sup>rd</sup>: 10 birds). Blood was again collected for metabolomic  
456 profiling.

457 All experimental procedures were carried out under license NIOO 13.11 of the Animal  
458 Experimentation Committee (DEC) of the Royal Netherlands Academy of Arts and Sciences.

459

#### 460 *Locomotor activity*

461 Daily activity patterns of each individual bird were measured continuously using micro-switches  
462 recorded by a computer, as described in de Jong et al [22]. See Supporting Information for more  
463 details.

464

#### 465 *Gene expression analyses*

466 After culling, organs were extracted, snap-frozen on dry ice, and stored at -80 °C within 10 min  
467 of capture.

468 Brain tissue was cut on a cryostat at -20 °C. We cut sagittal sections throughout the  
469 brain (Fig. S1). The hypothalamus and hippocampus were located by the use of the Zebrafinch  
470 atlas ZEBra (Oregon Health & Science University, Portland, OR, USA;  
471 <http://www.zebrafinchatlas.org>) and isolated from the frozen brain sections either by surgical  
472 punches for the hypothalamus (Harris Uni-Core, 3.0 mm), or by scraping the relevant tissue with  
473 forceps, for the hippocampus. For the hypothalamus, the edge of the circular punch was  
474 positioned adjacent to the midline and ventral edge of the section, just above the optic chiasm,  
475 following the procedure of [66]. Hypothalamic and hippocampal tissue was then immediately



476 added to separate 1.5ml buffer tubes provided by the Qiagen RNeasy micro extraction kit (see  
477 below), homogenized and stored at -80 °C until extraction.

478 Whole spleens were homogenized with a ryboliser and added to 1.5 ml RNeasy micro  
479 buffer and stored at -80 °C. For livers, we cut 0.5 g of tissue from each individual liver,  
480 homogenized it and added it to 1.5 ml RNeasy micro buffer and stored it at -80 °C. RNA was  
481 extracted using the RNeasy micro extraction kit and reverse transcribed it to generate cDNA  
482 using a standard kit following the manufacturer's instructions (Superscript III, Invitrogen).

483 We selected exemplary genes known to be involved in circadian timing, seasonal timing,  
484 and in metabolic, immune and endocrine function (Table S1). We analyzed the core clock gene  
485 *BMAL1* in all tissues as our primary clock indicator because of the timing of its expression and  
486 because of its role as central hub for inter-linking molecular pathways [7]. We also studied a  
487 second core clock gene, *CRY1*, in a single tissue, and a clock modulator, *CK1ε*, in two tissues. In  
488 the hypothalamus, we also studied two genes involved in seasonal changes (*DIO2*, *FOXP2*), and  
489 one metabolic and ageing gene (*SIRT1*). The second metabolic gene, *NRF1*, was studied in the  
490 liver. Two immune genes represented different pathways (*LY86*, *TLR4*). Finally, we studied  
491 endocrine genes involved in stress signaling in the Hippocampus (*NR3C1* (*alias GR*), *NR3C2* (*alias*  
492 *MR*)) and in tissue homeostasis (*IGF1*), as well as reference genes (for full details see Table S1).  
493 Primers were built based on the great tit reference genome build 1.1

494 ([https://www.ncbi.nlm.nih.gov/assembly/GCF\\_001522545.2](https://www.ncbi.nlm.nih.gov/assembly/GCF_001522545.2)) [33] and annotation release 101  
495 ([https://www.ncbi.nlm.nih.gov/genome/annotation\\_euk/Parus\\_major/101/](https://www.ncbi.nlm.nih.gov/genome/annotation_euk/Parus_major/101/)). Primer design was  
496 conducted with Geneious version 10.0.2 [67].

497 Amplification efficiency of each primer pair was determined through quantitative real-  
498 time polymerase chain reaction (RT-qPCR). RT-qPCR was performed on duplicate samples by a 5-

499 point standard curve. We used reference gene levels to correct for variation in PCR efficiency  
500 between samples. Reference gene expression stability was calculated using the application  
501 geNorm [68], from which we identified the best pair of reference genes for each tissue. Absolute  
502 amounts of cDNA were calculated by conversion of the Ct values ( $C \times E^{-Ct}$ , with  $C=10^{10}$  and  $E=2$ )  
503 [69]. The absolute amounts of the candidate genes were then normalized by division by the  
504 geometric mean of the absolute amounts of the reference genes. This step yielded relative  
505 mRNA expression levels of the candidate genes. For more details, see the Supporting  
506 Information document.

507

#### 508 *Metabolomics analysis*

509 See Supporting information for initial sample preparation and for additional details. All samples  
510 were analyzed on a Thermo Scientific QExactive Orbitrap mass spectrometer running in  
511 positive/negative switching mode. Mass spectrometry data were processed using a combination  
512 of XCMS 3.2.0 and MZMatch.R 1.0–4 [70]. Unique signals were extracted using the centwave  
513 algorithm [71] and matched across biological replicates based on mass to charge ratio and  
514 retention time. The final peak set was converted to text for use with IDEOM v18 [72], and  
515 filtered on the basis of signal to noise score, minimum intensity and minimum detections,  
516 resulting in a final dataset of 755 metabolites.

517

#### 518 *Statistical analysis*

519 All statistical analyses were conducted in R, version 3.63 [73]. In all models we included  
520 treatment as log-transformed light intensity (adding a constant to avoid zero). Details of all  
521 statistical analyses can be seen in the Supporting Information document.

522 To analyze locomotor activity data (i.e. perch-hopping), we first divided the time series  
523 of activity into an unstable phase and stable phase (see Supporting information). We used the  
524 data in the unstable phase to quantify circadian period length ( $\tau$ ) for each bird, then tested  
525 treatment effects using a gaussian linear model (LM). The data in the stable phase were used to  
526 test for variation in the proportion of time spent active every hour depending on treatment,  
527 using a generalized additive mixed model (GAMM). Finally, we tested for variation in onset time,  
528 offset time, nocturnal activity and total daily activity using separate linear mixed models  
529 (LMMs).

530 To examine variation in relative transcript levels, we ran LMs including ALAN treatment,  
531 sampling time (two-level factor, day and night), and their interaction as explanatory variables,  
532 and mRNA expression levels of the different genes in the different tissues as response variables.  
533 Similar models were used to test for relationships in mRNA levels between the same gene in  
534 different tissues, or different genes in the same tissue.

535 To test for variation in the levels of the individual metabolites identified by the LC-MS,  
536 we used all data, including the replicated mid-day samples (total  $n = 64$ ). We ran independent  
537 LMMs for each metabolite, with metabolite levels as response variable (log transformed and  
538 normalized), and treatment, time of day and their interaction as explanatory variables.  
539 Moreover, we ran two principal component analyses using only the 73 metabolites found to be  
540 significantly affected by the treatment\*time interaction in the LMMs described above. The two  
541 PCAs were run separately for the individual samples collected at mid-day or midnight. We then  
542 used the first two principal components (PC1 and PC2) of the midnight based PCA as  
543 explanatory variables in two LMs with onset and offset of activity as response variables,  
544 respectively.

## 545 **References**

- 546 1. Foster RG, Kreitzmann L. Rhythms of life: The biological clocks that control the daily lives of every  
547 living thing. New Haven, CT, USA: Yale University Press; 2004.
- 548 2. Helm B, Visser ME, Schwartz W, Kronfeld-Schor N, Gerkema M, Piersma T, et al. Two sides of a  
549 coin: Ecological and chronobiological perspectives of timing in the wild. *Philosophical Transactions*  
550 *of the Royal Society B: Biological Sciences*. Royal Society Publishing; 2017.  
551 doi:10.1098/rstb.2016.0246
- 552 3. Falchi F, Cinzano P, Duriscoe D, Kyba CCM, Elvidge CD, Baugh K, et al. The new world atlas of  
553 artificial night sky brightness. *Sci Adv*. 2016;2: e1600377–e1600377. doi:10.1126/sciadv.1600377
- 554 4. Davies TW, Smyth T. Why artificial light at night should be a focus for global change research in  
555 the 21st century. *Glob Chang Biol*. 2017; early view. doi:10.1111/gcb.13927
- 556 5. Borniger JC, Cisse YM, Surbhi, Nelson RJ. Reciprocal Regulation of Circadian Rhythms and Immune  
557 Function. *Current Sleep Medicine Reports*. Springer International Publishing; 2017. pp. 93–103.  
558 doi:10.1007/s40675-017-0070-7
- 559 6. Caratti G, Iqbal M, Hunter L, Kim D, Wang P, Vonslow RM, et al. REVERBa couples the circadian  
560 clock to hepatic glucocorticoid action. *J Clin Invest*. 2018;128: 4454–4471. doi:10.1172/JCI96138
- 561 7. Ribas-Latre A, Eckel-Mahan K. Interdependence of nutrient metabolism and the circadian clock  
562 system: Importance for metabolic health. *Molecular Metabolism*. Elsevier GmbH; 2016. pp. 133–  
563 152. doi:10.1016/j.molmet.2015.12.006
- 564 8. Dominoni DM, Nelson RJ. Artificial light at night as an environmental pollutant: An integrative  
565 approach across taxa, biological functions, and scientific disciplines. *J Exp Zool Part A Ecol Integr*  
566 *Physiol*. 2018;329. doi:10.1002/jez.2241
- 567 9. Vetter C. Circadian disruption: What do we actually mean? *European Journal of Neuroscience*.  
568 Blackwell Publishing Ltd; 2020. pp. 531–550. doi:10.1111/ejn.14255
- 569 10. Falcón J, Torriglia A, Attia D, Viénot F, Gronfier C, Behar-Cohen F, et al. Exposure to Artificial Light

- 570 at Night and the Consequences for Flora, Fauna, and Ecosystems. *Frontiers in Neuroscience*.  
571 *Frontiers Media S.A.*; 2020. p. 1183. doi:10.3389/fnins.2020.602796
- 572 11. Ouyang JQ, de Jong M, van Grunsven RHA, Matson KD, Haussmann MF, Meerlo P, et al. Restless  
573 roosts – light pollution affects behavior, sleep and physiology in a free-living songbird. *Glob Chang*  
574 *Biol*. 2017; 1–8.
- 575 12. Knop E, Zoller L, Ryser R, Gerpe C, Hörlner M, Fontaine C. Artificial light at night as a new threat to  
576 pollination. *Nature*. 2017. doi:10.1038/nature23288
- 577 13. Dominoni D, Quetting M, Partecke J. Artificial light at night advances avian reproductive  
578 physiology. *Proc R Soc B Biol Sci*. 2013;280: 20123017. doi:10.1098/rspb.2012.3017
- 579 14. Dominoni DMM, Helm B, Lehmann M, Dowse HBB, Partecke J. Clocks for the city: circadian  
580 differences between forest and city songbirds. *Proc R Soc London B Biol Sci*. 2013;280: 20130593.  
581 doi:10.1098/rspb.2013.0593
- 582 15. Batra T, Malik I, Kumar V. Illuminated night alters behaviour and negatively affects physiology and  
583 metabolism in diurnal zebra finches. *Environ Pollut*. 2019;254: 112916.  
584 doi:10.1016/J.ENVPOL.2019.07.084
- 585 16. Batra T, Malik I, Prabhat A, Bhardwaj SK, Kumar V. Sleep in unnatural times: illuminated night  
586 negatively affects sleep and associated hypothalamic gene expressions in diurnal zebra finches.  
587 *Proc R Soc B Biol Sci*. 2020;287: 20192952. doi:10.1098/rspb.2019.2952
- 588 17. Yang Y, Liu Q, Wang T, Pan J. Light pollution disrupts molecular clock in avian species: A power-  
589 calibrated meta-analysis. *Environ Pollut*. 2020; 114206. doi:10.1016/j.envpol.2020.114206
- 590 18. Van Der Vinne V, Riede SJ, Gorter JA, Eijer WG, Sellix MT, Menaker M, et al. Cold and hunger  
591 induce diurnality in a nocturnal mammal. *Proc Natl Acad Sci U S A*. 2014;111: 15256–15260.  
592 doi:10.1073/pnas.1413135111
- 593 19. Ouyang JQ, Davies S, Dominoni D. Hormonally mediated effects of artificial light at night on  
594 behavior and fitness: linking endocrine mechanisms with function. *J Exp Biol*. 2018;221:  
595 jeb156893. doi:10.1242/jeb.156893

- 596 20. Moaraf S, Vistoropsky Y, Pozner T, Heiblum R, Okuliarová M, Zeman M, et al. Artificial light at  
597 night affects brain plasticity and melatonin in birds. *Neurosci Lett*. 2020;716: 134639.  
598 doi:10.1016/j.neulet.2019.134639
- 599 21. Moreno CRC, Wright K, Skene DJ, Louzada FM. Phenotypic plasticity of circadian entrainment  
600 under a range of light conditions. *Neurobiol Sleep Circadian Rhythm*. 2020;9: 100055.  
601 doi:10.1016/j.nbscr.2020.100055
- 602 22. de Jong M, Jeninga L, Ouyang JQ, van Oers K, Spoelstra K, Visser ME. Dose-dependent responses  
603 of avian daily rhythms to artificial light at night. *Physiol Behav*. 2016;155: 172–179.  
604 doi:10.1016/j.physbeh.2015.12.012
- 605 23. Sun J, Raap T, Pinxten R, Eens M. Artificial light at night affects sleep behaviour differently in two  
606 closely related songbird species. *Environ Pollut*. 2017;231: 882–889.  
607 doi:10.1016/j.envpol.2017.08.098
- 608 24. Spoelstra K, Verhagen I, Meijer D, Visser ME. Artificial light at night shifts daily activity patterns  
609 but not the internal clock in the great tit (*Parus major*). *Proc R Soc B Biol Sci*. 2018;285: 20172751.  
610 doi:10.1098/rspb.2017.2751
- 611 25. Ulgezen ZN, Kämpylä T, Meerlo P, Spoelstra K, Visser ME, Dominoni DM. The preference and costs  
612 of sleeping under light at night in forest and urban great tits. *Proc R Soc B Biol Sci*. 2019;286:  
613 20190872. doi:10.1098/rspb.2019.0872
- 614 26. Raap T, Pinxten R, Eens M. Light pollution disrupts sleep in free-living animals. *Sci Rep*. 2015;5:  
615 13557. doi:10.1038/srep13557
- 616 27. Dominoni D, Quetting M, Partecke J. Artificial light at night advances avian reproductive  
617 physiology. *Proc R Soc B Biol Sci*. 2013;280. doi:10.1098/rspb.2012.3017
- 618 28. Dominoni DMD, Carmona-Wagner EOE, Hofmann M, Kranstauber B, Partecke J. Individual-based  
619 measurements of light intensity provide new insights into the effects of artificial light at night on  
620 daily rhythms of urban-dwelling songbirds. *J Anim Ecol*. 2014;83: 681–692. doi:10.1111/1365-  
621 2656.12150

- 622 29. Cassone VM, Paulose JK, Harpole CE, Li Y, Whitfield-Rucker M. Avian circadian organization.  
623 Biological Timekeeping: Clocks, Rhythms and Behaviour. Springer (India) Private Ltd.; 2017. pp.  
624 241–256. doi:10.1007/978-81-322-3688-7\_11
- 625 30. Dominoni D, de Jong M, Bellingham M, O’Shaughnessy P, van Oers K, Robinson J, et al. Dose-  
626 response effects of light at night on the reproductive physiology of great tits (*Parus major*):  
627 Integrating morphological analyses with candidate gene expression. *J Exp Zool Part A Ecol Integr*  
628 *Physiol.* 2018;2018: 1–15. doi:10.1002/jez.2214
- 629 31. Davies SK, Ang JE, Revell VL, Holmes B, Mann a., Robertson FP, et al. Effect of sleep deprivation  
630 on the human metabolome. *Proc Natl Acad Sci.* 2014;111: 10761–10766.  
631 doi:10.1073/pnas.1402663111
- 632 32. Watson H, Videvall E, Andersson MN, Isaksson C. Transcriptome analysis of a wild bird reveals  
633 physiological responses to the urban environment. *Sci Rep.* 2017;7: 1–10. doi:10.1038/srep44180
- 634 33. Laine VN, Gossmann TI, Schachtschneider KM, Garroway CJ, Madsen O, Verhoeven KJ, et al.  
635 Evolutionary signals of selection on cognition from the great tit genome and methylome. *Nat*  
636 *Commun.* 2016;7: 10474. doi:10.1038/ncomms10474
- 637 34. Capilla-Lasheras P, Dominoni DMDM, Babayan SASA, O’Shaughnessy PJPJ, Mladenova M,  
638 Woodford L, et al. Elevated Immune Gene Expression Is Associated with Poor Reproductive  
639 Success of Urban Blue Tits. *Front Ecol Evol.* 2017;5: 64. doi:10.3389/fevo.2017.00064
- 640 35. Kasukawa T, Sugimoto M, Hida A, Minami Y, Mori M, Honma S, et al. Human blood metabolite  
641 timetable indicates internal body time. *Proc Natl Acad Sci U S A.* 2012;109: 15036–15041.  
642 doi:10.1073/pnas.1207768109
- 643 36. Laing EE, Möller-Levet CS, Poh N, Santhi N, Archer SN, Dijk DJ. Blood transcriptome based  
644 biomarkers for human circadian phase. *Elife.* 2017;6. doi:10.7554/eLife.20214
- 645 37. Helm B, Visser ME. Heritable circadian period length in a wild bird population. *Proc R Soc B Biol*  
646 *Sci.* 2010;277: 3335–3342. doi:10.1098/rspb.2010.0871
- 647 38. Chang H-C, Guarente L. SIRT1 Mediates Central Circadian Control in the SCN by a Mechanism that

- 648           Decays with Aging. *Cell*. 2013;153: 1448–1460. doi:10.1016/j.cell.2013.05.027
- 649   39.   Trivedi AK, Kumar J, Rani S, Kumar V. Annual life history-dependent gene expression in the  
650           hypothalamus and liver of a migratory songbird: Insights into the molecular regulation of seasonal  
651           metabolism. *J Biol Rhythms*. 2014;29: 332–345. doi:10.1177/0748730414549766
- 652   40.   Creek DJ, Jankevics A, Breitling R, Watson DG, Barrett MP, Burgess KEV. Toward global  
653           metabolomics analysis with hydrophilic interaction liquid chromatography-mass spectrometry:  
654           Improved metabolite identification by retention time prediction. *Anal Chem*. 2011;83: 8703–8710.  
655           doi:10.1021/ac2021823
- 656   41.   Chong J, Soufan O, Li C, Caraus I, Li S, Bourque G, et al. MetaboAnalyst 4.0: Towards more  
657           transparent and integrative metabolomics analysis. *Nucleic Acids Res*. 2018;46: W486–W494.  
658           doi:10.1093/nar/gky310
- 659   42.   Dominoni DMD, Goymann W, Helm B, Partecke J. Urban-like night illumination reduces melatonin  
660           release in European blackbirds (*Turdus merula*): implications of city life for biological time-keeping  
661           of songbirds. *Front Zool*. 2013;10: 60. doi:10.1186/1742-9994-10-60
- 662   43.   Kempnaers B, Borgström P, Loës P, Schlicht E, Valcu M. Artificial night lighting affects dawn song,  
663           extra-pair siring success, and lay date in songbirds. *Curr Biol*. 2010;20: 1735–1739.  
664           doi:10.1016/j.cub.2010.08.028
- 665   44.   Dominoni DM, Smit JAH, Visser ME, Halfwerk W. Multisensory pollution: Artificial light at night  
666           and anthropogenic noise have interactive effects on activity patterns of great tits (*Parus major*).  
667           *Environ Pollut*. 2019; 113314. doi:10.1016/j.envpol.2019.113314
- 668   45.   Da Silva A, Samplonius J, Schlicht E, Valcu M, Kempnaers B. Artificial night lighting rather than  
669           traffic noise affects the daily timing of dawn and dusk singing in common European songbirds.  
670           *Behav Ecol*. 2014;25: 1037–1047. doi:10.1093/beheco/aru103
- 671   46.   Renthlei Z, Trivedi AK. Effect of urban environment on pineal machinery and clock genes  
672           expression of tree sparrow (*Passer montanus*). *Environ Pollut*. 2019;255: 113278.  
673           doi:10.1016/j.envpol.2019.113278



- 674 47. Renthlei Z, Borah BK, Gurumayum T, Trivedi AK. Season dependent effects of urban environment  
675 on circadian clock of tree sparrow ( *Passer montanus* ). *Photochem Photobiol Sci*. 2020 [cited 9  
676 Dec 2020]. doi:10.1039/d0pp00257g
- 677 48. Gwinner F. Testosterone Induces “Splitting” of Circadian Locomotor Activity Rhythms in Birds.  
678 *Science*. 1974. pp. 72–74. doi:10.1126/science.185.4145.72
- 679 49. Archer SN, Laing EE, Moller-Levet CS, van der Veen DR, Bucca G, Lazar a. S, et al. PNAS Plus: From  
680 the Cover: Mistimed sleep disrupts circadian regulation of the human transcriptome. *Proc Natl*  
681 *Acad Sci*. 2014;111: E682–E691. doi:10.1073/pnas.1316335111
- 682 50. Skene DJ, Skornyakov E, Chowdhury NR, Gajula RP, Middleton B, Satterfield BC, et al. Separation  
683 of circadian- and behavior-driven metabolite rhythms in humans provides a window on peripheral  
684 oscillators and metabolism. *Proc Natl Acad Sci U S A*. 2018;115: 7825–7830.  
685 doi:10.1073/pnas.1801183115
- 686 51. Morris SM. Arginine: Master and commander in innate immune responses. *Science Signaling*.  
687 American Association for the Advancement of Science; 2010. pp. pe27–pe27.  
688 doi:10.1126/scisignal.3135pe27
- 689 52. Morris SM. Enzymes of arginine metabolism. *Journal of Nutrition*. American Institute of Nutrition;  
690 2004. pp. 2743S–2747S. doi:10.1093/jn/134.10.2743s
- 691 53. Clark JB. N-acetyl aspartate: A marker for neuronal loss or mitochondrial dysfunction.  
692 *Developmental Neuroscience*. *Dev Neurosci*; 1998. pp. 271–276. doi:10.1159/000017321
- 693 54. Yelamanchi SD, Jayaram S, Thomas JK, Gundimeda S, Khan AA, Singhal A, et al. A pathway map of  
694 glutamate metabolism. *J Cell Commun Signal*. 2016;10: 69–75. doi:10.1007/s12079-015-0315-5
- 695 55. Morris SM. Arginine metabolism revisited. *J Nutr*. 2016;146: 2579S–2586S.  
696 doi:10.3945/jn.115.226621
- 697 56. Taufique SKT, Prabhat A, Kumar V. Illuminated night alters hippocampal gene expressions and  
698 induces depressive-like responses in diurnal corvids. *Eur J Neurosci*. 2018;48: 3005–3018.  
699 doi:10.1111/ejn.14157

- 700 57. Taufique SKT, Prabhat A, Kumar V. Constant light environment suppresses maturation and  
701 reduces complexity of new born neuron processes in the hippocampus and caudal nidopallium of  
702 a diurnal corvid: Implication for impairment of the learning and cognitive performance. *Neurobiol*  
703 *Learn Mem.* 2018;147: 120–127. doi:10.1016/j.nlm.2017.12.001
- 704 58. Kernbach ME, Newhouse DJ, Miller JM, Hall RJ, Gibbons J, Oberstaller J, et al. Light pollution  
705 increases West Nile virus competence of a ubiquitous passerine reservoir species. *Proc R Soc B*  
706 *Biol Sci.* 2019;286: 20191051. doi:10.1098/rspb.2019.1051
- 707 59. Kyba CCM, Kuester T, Sánchez de Miguel A, Baugh K, Jechow A, Hölker F, et al. Artificially lit  
708 surface of Earth at night increasing in radiance and extent. *Sci Adv.* 2017;3: e1701528.  
709 doi:10.1126/sciadv.1701528
- 710 60. Bruening A, Hölker F, Franke S, Preuer T, Kloas W. Spotlight on fish: Light pollution affects  
711 circadian rhythms of European perch but does not cause stress. *Sci Total Environ.* 2015;511: 516–  
712 522. doi:10.1016/j.scitotenv.2014.12.094
- 713 61. Gaston KJ, Davies TW, Bennie J, Hopkins J. REVIEW: Reducing the ecological consequences of  
714 night-time light pollution: options and developments. *J Appl Ecol.* 2012;49: 1256–1266.  
715 doi:10.1111/j.1365-2664.2012.02212.x
- 716 62. Dominoni D, Borniger J, Nelson R. Light at night, clocks and health: from humans to wild  
717 organisms. *Biol Lett.* 2016;12: 20160015. doi:10.1098/rsbl.2016.0015
- 718 63. Bennie J, Davies TW, Cruse D, Gaston KJ. Ecological effects of artificial light at night on wild plants.  
719 *J Ecol.* 2016;104: 611–620. doi:10.1111/1365-2745.12551
- 720 64. van Langevelde F, Braamburg-Annegarn M, Huigens ME, Groendijk R, Poitevin O, van Deijk JR, et  
721 al. Declines in moth populations stress the need for conserving dark nights. *Glob Chang Biol.*  
722 2018;24: 925–932. doi:10.1111/gcb.14008
- 723 65. Paksarian D, Rudolph KE, Stapp EK, Dunster GP, He J, Mennitt D, et al. Association of Outdoor  
724 Artificial Light at Night with Mental Disorders and Sleep Patterns among US Adolescents. *JAMA*  
725 *Psychiatry.* 2020 [cited 27 Aug 2020]. doi:10.1001/jamapsychiatry.2020.1935

- 726 66. Perfito N, Jeong SY, Silverin B, Calisi RM, Bentley GE, Hau M. Anticipating spring: Wild populations  
727 of great tits (*Parus major*) differ in expression of key genes for photoperiodic time measurement.  
728 PLoS One. 2012;7. doi:10.1371/journal.pone.0034997
- 729 67. Kearse M, Moir R, Wilson A, Stones-Havas S, Cheung M, Sturrock S, et al. Geneious Basic: An  
730 integrated and extendable desktop software platform for the organization and analysis of  
731 sequence data. *Bioinformatics*. 2012;28: 1647–1649. doi:10.1093/bioinformatics/bts199
- 732 68. Vandesompele J, De Preter K, Pattyn F, Poppe B, Van Roy N, De Paepe A, et al. Accurate  
733 normalization of real-time quantitative RT-PCR data by geometric averaging of multiple internal  
734 control genes. *Genome Biol*. 2002;3: research0034.1. doi:10.1186/gb-2002-3-7-research0034
- 735 69. Dijk F, Kraal-Muller E, Kamphuis W. Ischemia-Induced Changes of AMPA-Type Glutamate Receptor  
736 Subunit Expression Pattern in the Rat Retina: A Real-Time Quantitative PCR Study. *Investig*  
737 *Ophthalmol Vis Sci*. 2004;45: 330–341. doi:10.1167/iovs.03-0285
- 738 70. Scheltema RA, Jankevics A, Jansen RC, Swertz MA, Breitling R. PeakML/mzMatch: A file format,  
739 Java library, R library, and tool-chain for mass spectrometry data analysis. *Anal Chem*. 2011;83:  
740 2786–2793. doi:10.1021/ac2000994
- 741 71. Tautenhahn R, Bottcher C, Neumann S. Highly sensitive feature detection for high resolution  
742 LC/MS. *BMC Bioinformatics*. 2008;9: 1–16. doi:10.1186/1471-2105-9-504
- 743 72. Creek DJ, Jankevics A, Burgess KEV, Breitling R, Barrett MP. IDEOM: An Excel interface for analysis  
744 of LC-MS-based metabolomics data. *Bioinformatics*. 2012;28: 1048–1049.  
745 doi:10.1093/bioinformatics/bts069
- 746 73. R Development Core Team. R: A language and environment for statistical computing. URL  
747 <http://www.R-project.org>. Vienna: R Foundation for Statistical Computing; 2015.  
748  
749

750 **Acknowledgments:** This work was supported by a Wellcome Trust grant to B.H and D.M.D  
751 (097821/Z/11/Z), a Marie-Curie Career Integration Grant to B.H. (ECCIG (618578) Wildclocks), a  
752 NERC Highlight Topics grant to D.M.D. (NE/S005773/1) and the Dutch Technology Foundation  
753 (STW). We thank Kamiel Spoelstra, Takashi Yoshimura and Bill Schwartz for fruitful discussions  
754 on the results of this study.

755

756 **Author Contributions:** DMD, MdJ, MEV and BH designed the study. DMD, MdJ, PBD, LT and BH  
757 collected the data and samples. DMD, KvO, POS, EA, CAM, MB, JC performed the gene  
758 expression assays. GB performed the metabolomics analyses. DMD conducted the statistical  
759 analyses. DMD and BH wrote the paper.

760

761 **Competing Interest Statement:** We declare no competing interests.

762
